# Supplementary material
Source: PubMed Central journal article supplement (PMC3959744)
Supplement: NIHMS490881-supplement-1_si_001.pdf [file NIHMS490881-supplement-1_si_001.pdf]

## SUPPORTING INFORMATION

# **Systematic Structure Modifications of Multi-target Prostate Cancer Clinical Candidate Galeterone to Produce Novel Androgen Receptor Down-regulating Agents as an Approach to Treatment of Advanced Prostate Cancer**

Puranik Purushottamachar<sup>#,1,2</sup>, Abhijit M. Godbole<sup>#,1,2</sup>, Lalji K. Gediya<sup>1,2</sup>, Marlena S. Martin<sup>1,2</sup>, Tadas S. Vasaitis<sup>4,5</sup>, Andrew Kwegyir-Afful<sup>1,2</sup>, Zeynep Ates-Alagoz<sup>6,7</sup> and Vincent C. O. Njar<sup>\*,1,2,3</sup>

<sup>1</sup>Department of Pharmacology, <sup>2</sup>Center for Biomolecular Therapeutics, Maryland, <sup>3</sup>Marlene Stewart Greenebaum Cancer Center, University of Maryland School of Medicine, 685 West Baltimore Street, Baltimore, MD 21201-1559, USA. <sup>4</sup>Department of Medicine, University of Maryland School of Medicine; Baltimore, MD; and <sup>5</sup>Department of Pharmaceutical Sciences, University of Maryland Eastern Shore, Princes Anne, MD, USA. <sup>6</sup>Department of Pharmaceutical Chemistry, Faculty of Pharmacy, Ankara University, Tandogan, Ankara 06100, Turkey. <sup>7</sup>Department of Pharmaceutical Sciences, Philadelphia College of Pharmacy, University of the Sciences, Philadelphia, PA 19104, USA.

<sup>#</sup>These authors contributed equally to the work performed in this manuscript.

\*Corresponding author: Vincent C. O. Njar: Tel: (410) 706 6364; E-mail: [vnjar@som.umaryland.edu](mailto:vnjar@som.umaryland.edu)

**Contents:** HPLC chromatograms and high resolution mass spectral data for compounds **16 – 22, 25, 28, 31** and **33 – 49**. This material is available free of charge via the internet at <http://pubs.acs.org>

**SAMPLE INFORMATION**

Sample Name: VNPT144  
 Sample Type: Unknown  
 Vial: 23  
 Injection #: 1  
 Injection Volume: 20.00 ul  
 Run Time: 30.0 Minutes  
 Sample Set Name: Puru Sample Set 2

Acquired By: System  
 Date Acquired: 4/13/2012 12:08:12 AM  
 Acq. Method Set: VN124  
 Date Processed: 4/13/2012 10:49:19 AM  
 Processing Method: VN124venky  
 Channel Name: WIn Ch1  
 Proc. Chnl. Descr.: FDA 242.7 nm

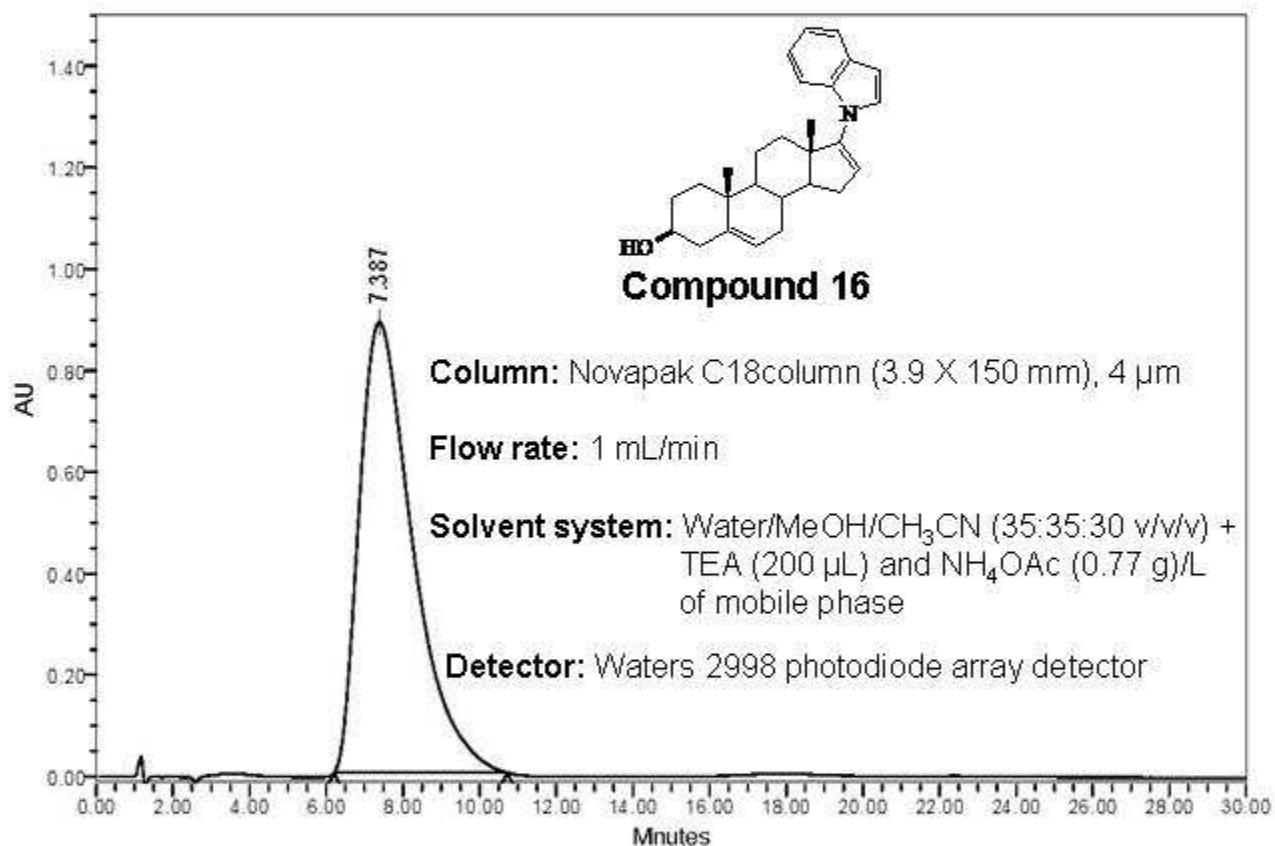

**PDA Result Table**

|   | Name | RT    | Area     | Purity (#1)<br>Angle | Purity (#1)<br>Threshold | Purity<br>Flag | Match (#1)<br>Spect. Name | Match (#1)<br>Angle | Match (#1)<br>Threshold | PDA Match<br>Flag |
|---|------|-------|----------|----------------------|--------------------------|----------------|---------------------------|---------------------|-------------------------|-------------------|
| 1 |      | 7.387 | 85848846 |                      |                          | No             |                           |                     |                         | No                |

| Name | Retention Time<br>(min) | Purity1<br>Angle | Purity1<br>Threshold | PDA Match1<br>Spect. Name | PDA Match1<br>Angle | PDA Match1<br>Threshold | PDA Match1<br>Lib. Name | Area<br>(µV*sec) | % Area | Height<br>(µV) | Int Type | Amount |
|------|-------------------------|------------------|----------------------|---------------------------|---------------------|-------------------------|-------------------------|------------------|--------|----------------|----------|--------|
| 1    | 7.387                   |                  |                      |                           |                     |                         |                         | 85848846         | 100.00 | 887465         | bb       |        |

# Mass Spectrum List Report

## Analysis Info

Analysis Name VNPT144\_pos\_000001.d

Method XMASS\_Method

Sample Name: VNPT144\_pos  
VNPT144\_pos: in 1:1 THF:MeOH w/ NaCl.

Acquisition Date 12/13/2010 3:22:31 PM

Operator FTMS\_USER

Instrument apex-Qe

## Acquisition Parameter

Sample Name: VNPT144

Exact Mass of (C<sub>27</sub>H<sub>33</sub>NO)Na<sup>+</sup>: 410.245436u

Observed Mass: 410.246008u

Difference: 1.4 ppm

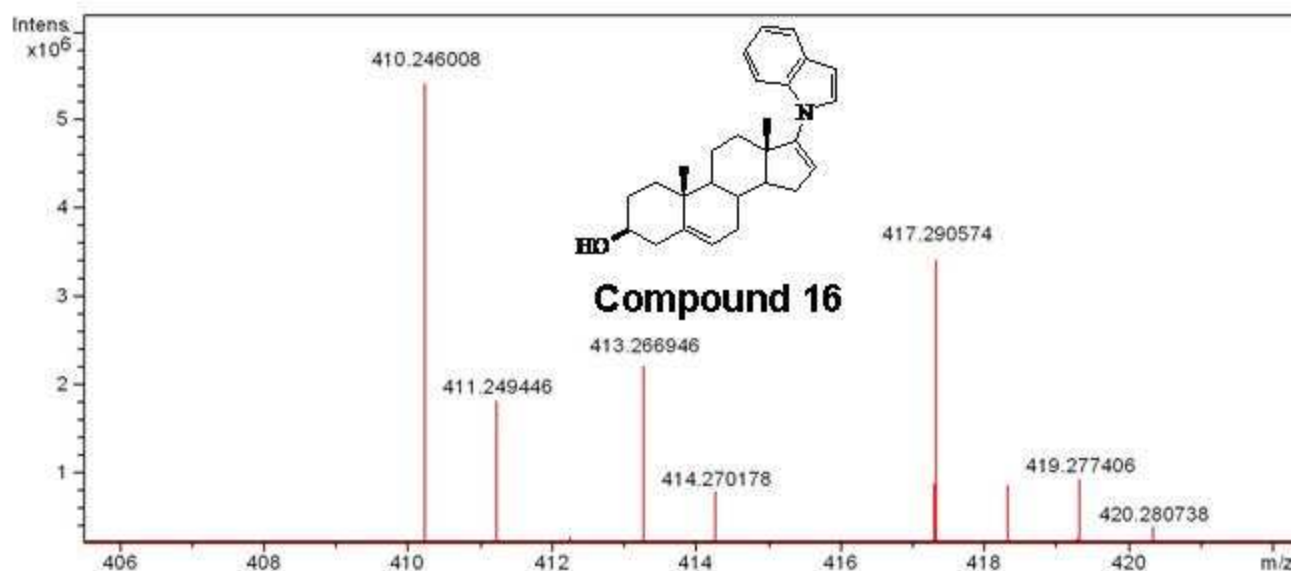

| #  | m/z        | I       |
|----|------------|---------|
| 1  | 134.556119 | 403440  |
| 2  | 136.518053 | 429200  |
| 3  | 137.090914 | 1156049 |
| 4  | 137.291678 | 400945  |
| 5  | 146.927649 | 602594  |
| 6  | 160.827351 | 458290  |
| 7  | 171.361692 | 392829  |
| 8  | 184.232201 | 400095  |
| 9  | 184.451713 | 462658  |
| 10 | 210.584345 | 566629  |
| 11 | 228.484673 | 592840  |
| 12 | 228.484951 | 837320  |
| 13 | 233.292188 | 459175  |
| 14 | 319.930282 | 415031  |
| 15 | 342.717320 | 1126513 |
| 16 | 342.726527 | 727665  |
| 17 | 368.109441 | 577251  |
| 18 | 368.117713 | 982627  |
| 19 | 368.120246 | 1038051 |
| 20 | 368.124977 | 1222243 |
| 21 | 368.127888 | 1354723 |
| 22 | 368.131810 | 1103587 |
| 23 | 368.135190 | 3157987 |

**SAMPLE INFORMATION**

Sample Name: VNPT140  
 Sample Type: Unknown  
 Vial: 22  
 Injection #: 2  
 Injection Volume: 10.00 ul  
 Run Time: 20.0 Minutes  
 Sample Set Name:

Acquired By: System  
 Date Acquired: 4/16/2012 4:51:57 PM  
 Acq. Method Set: VN124  
 Date Processed: 4/16/2012 5:46:42 PM  
 Processing Method: VN124venky  
 Channel Name: WWin Ch1  
 Proc. Chnl. Descr.: FDA 242.7 nm

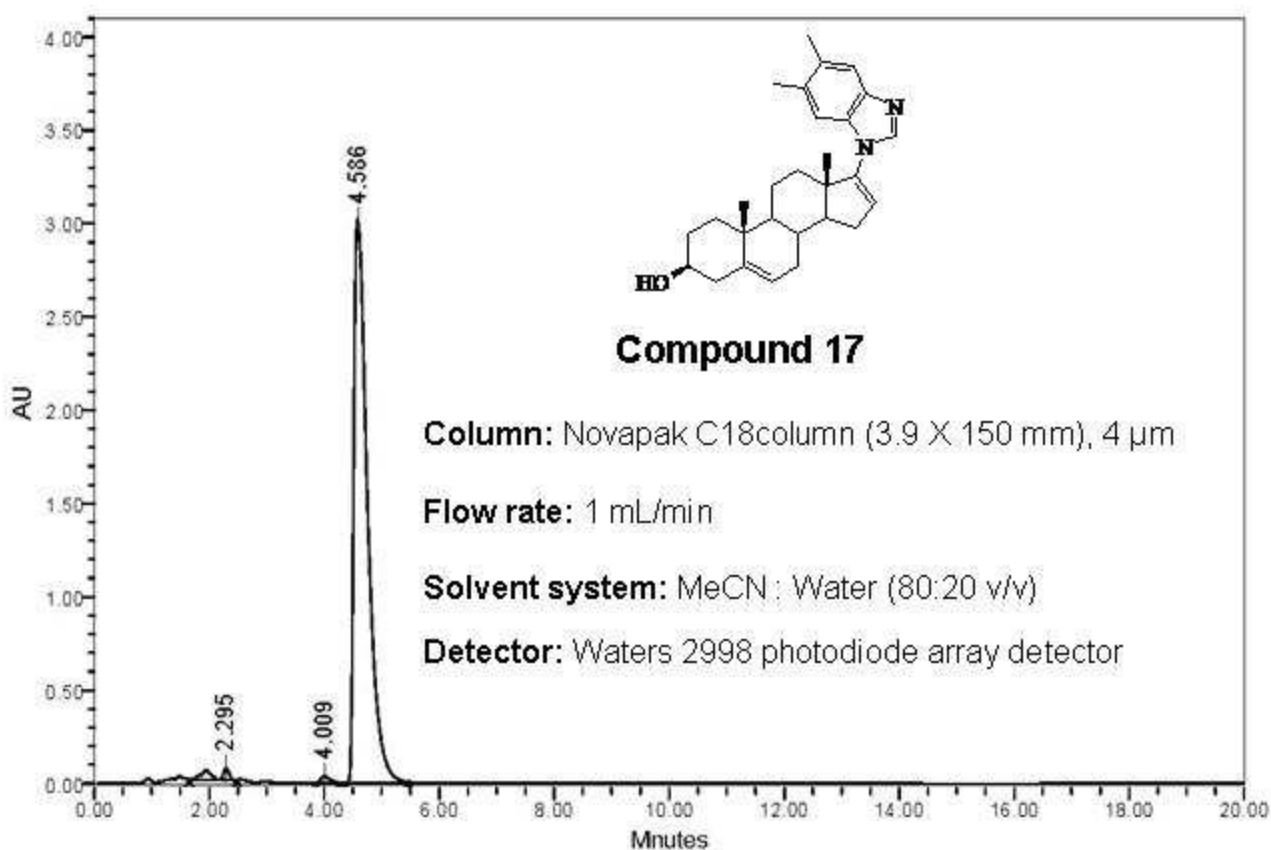

**Compound 17**

**Column:** Novapak C18column (3.9 X 150 mm), 4 µm

**Flow rate:** 1 mL/min

**Solvent system:** MeCN : Water (80:20 v/v)

**Detector:** Waters 2998 photodiode array detector

**PDA Result Table**

| Name | RT    | Area    | Purity (#1)<br>Angle | Purity (#1)<br>Threshold | Purity<br>Flag | Match (#1)<br>Spect. Name | Match (#1)<br>Angle | Match (#1)<br>Threshold | PDA Match<br>Flag |
|------|-------|---------|----------------------|--------------------------|----------------|---------------------------|---------------------|-------------------------|-------------------|
| 1    | 2.295 | 1082619 |                      |                          | No             |                           |                     |                         | No                |
| 2    | 4.009 | 365305  |                      |                          | No             |                           |                     |                         | No                |

| Name | Retention Time<br>(min) | Purity1<br>Angle | Purity1<br>Threshold | PDA Match1<br>Spect. Name | PDA Match1<br>Angle | PDA Match1<br>Threshold | PDA Match1<br>Lib. Name | Area<br>(µV*sec) | % Area | Height<br>(µV) | Int Type | Amount |
|------|-------------------------|------------------|----------------------|---------------------------|---------------------|-------------------------|-------------------------|------------------|--------|----------------|----------|--------|
| 1    | 2.295                   |                  |                      |                           |                     |                         |                         | 1082619          | 2.11   | 63749          | bb       |        |
| 2    | 4.009                   |                  |                      |                           |                     |                         |                         | 365305           | 0.71   | 35251          | bb       |        |
| 3    | 4.586                   |                  |                      |                           |                     |                         |                         | 49772396         | 97.17  | 3024747        | bb       |        |

## Mass Spectrum List Report

### Analysis Info

Analysis Name VNPT140\_pos\_000001.d  
Method XMASS\_Method  
Sample Name: VNPT140\_pos  
VNPT140\_pos: in 1:1 THF:MeOH w/ NaCl.

Acquisition Date 12/13/2010 3:19:04 PM  
Operator FTMS\_USER  
Instrument apex-Qe

### Acquisition Parameter

Sample Name: VNPT140  
Exact Mass of (C<sub>28</sub>H<sub>36</sub>N<sub>2</sub>O)Na<sup>+</sup>: 439.271985u  
Observed Mass: 439.272640u  
Difference: 1.5 ppm

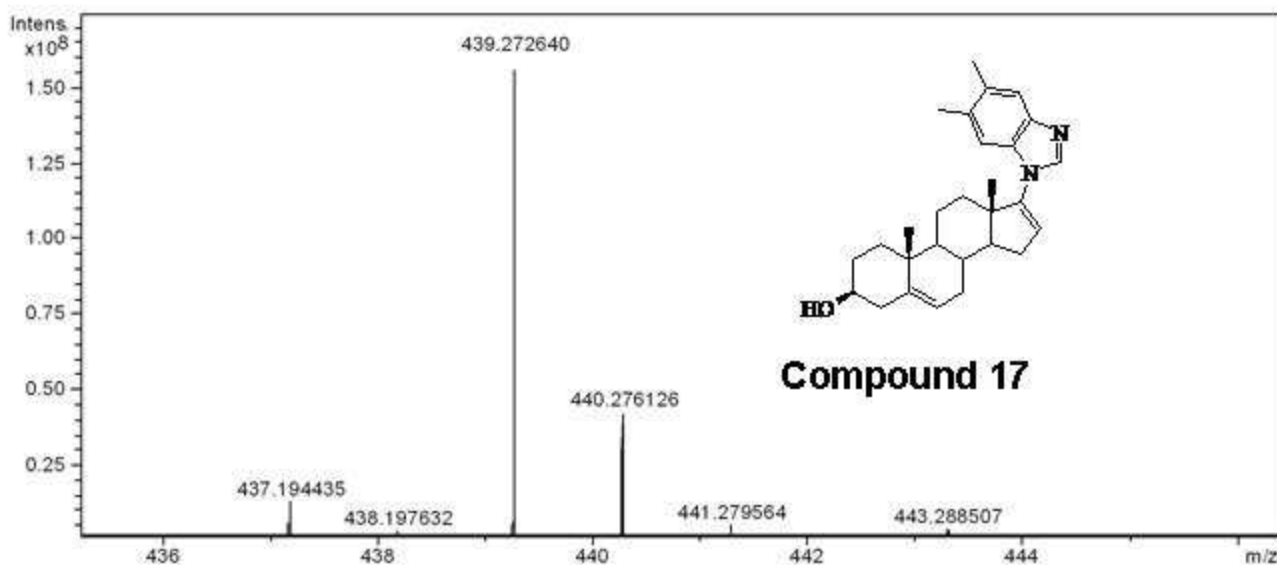

| #  | m/z        | I         |
|----|------------|-----------|
| 1  | 417.286515 | 48179623  |
| 2  | 417.288766 | 56356263  |
| 3  | 417.290328 | 336768423 |
| 4  | 418.290242 | 30903724  |
| 5  | 418.293937 | 87600556  |
| 6  | 418.295491 | 9670060   |
| 7  | 419.293856 | 6751666   |
| 8  | 419.297519 | 9850290   |
| 9  | 437.190212 | 5807665   |
| 10 | 437.194435 | 12582449  |
| 11 | 439.268445 | 43593283  |
| 12 | 439.270729 | 17509955  |
| 13 | 439.272640 | 159493699 |
| 14 | 440.271999 | 23744076  |
| 15 | 440.274570 | 7175756   |
| 16 | 440.276126 | 42069580  |
| 17 | 441.279564 | 5295701   |
| 18 | 463.304164 | 6043451   |
| 19 | 467.263083 | 11276138  |
| 20 | 467.267955 | 26709866  |
| 21 | 468.271269 | 8023926   |
| 22 | 507.330461 | 11391325  |
| 23 | 510.310388 | 5251458   |

**SAMPLE INFORMATION**

Sample Name: VNPT191  
 Sample Type: Unknown  
 Vial: 28  
 Injection #: 1  
 Injection Volume: 20.00 ul  
 Run Time: 30.0 Minutes  
 Sample Set Name: Puru Sample Set 2

Acquired By: System  
 Date Acquired: 4/13/2012 2:44:27 AM  
 Acq. Method Set: VN124  
 Date Processed: 4/13/2012 11:35:55 AM  
 Processing Method: VN124venky  
 Channel Name: WIn Ch1  
 Proc. Chnl. Descr.: FDA 242.7 nm

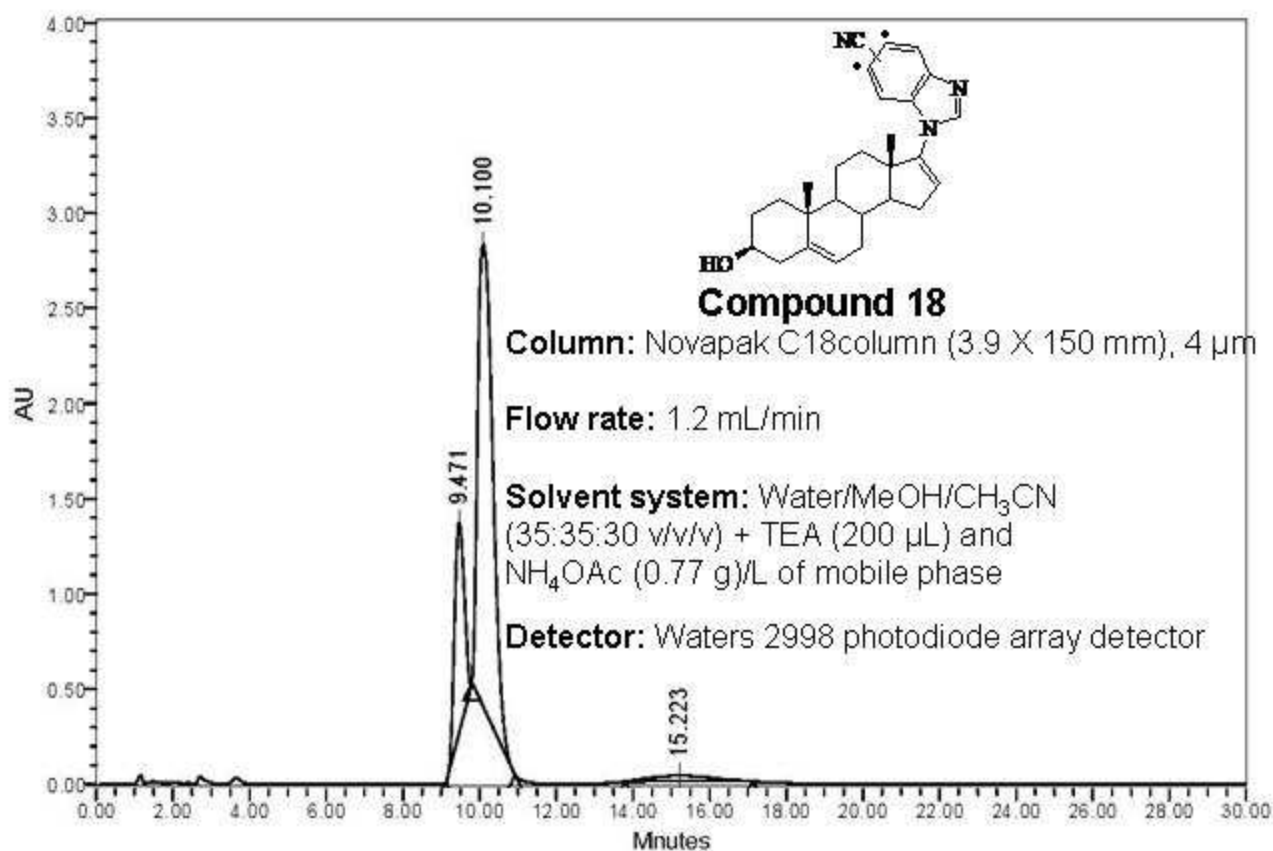

**PDA Result Table**

|   | Name | RT     | Area     | Purity (#1)<br>Angle | Purity (#1)<br>Threshold | Purity<br>Flag | Match (#1)<br>Spect. Name | Match (#1)<br>Angle | Match (#1)<br>Threshold | PDA Match<br>Flag |
|---|------|--------|----------|----------------------|--------------------------|----------------|---------------------------|---------------------|-------------------------|-------------------|
| 1 |      | 9.471  | 19310379 |                      |                          | No             |                           |                     |                         | No                |
| 2 |      | 10.100 | 66248525 |                      |                          | No             |                           |                     |                         | No                |

| Name | Retention Time (min) | Purity1<br>Angle | Purity1<br>Threshold | PDA Match1<br>Spect. Name | PDA Match1<br>Angle | PDA Match1<br>Threshold | PDA Match1<br>Lib. Name | Area<br>(µV*sec) | % Area | Height<br>(µV) | Int Type | Amount |
|------|----------------------|------------------|----------------------|---------------------------|---------------------|-------------------------|-------------------------|------------------|--------|----------------|----------|--------|
| 1    | 9.471                |                  |                      |                           |                     |                         |                         | 19310379         | 21.71  | 1104336        | bb       |        |
| 2    | 10.100               |                  |                      |                           |                     |                         |                         | 66248525         | 74.46  | 2427980        | bb       |        |
| 3    | 15.223               |                  |                      |                           |                     |                         |                         | 3407799          | 3.83   | 30204          | bb       |        |

# Mass Spectrum List Report

## Analysis Info

Analysis Name VNPT191\_pos\_000001.d  
Method XMASS\_Method  
Sample Name: VNPT191\_pos  
VNPT191\_pos: in ACN w/ 0.1% FA.

Acquisition Date 3/20/2012 1:25:02 PM  
Operator FTMS\_USER  
Instrument apex-Qe

## Acquisition Parameter

Sample: VNPT191

Exact Mass of (C<sub>27</sub>H<sub>31</sub>N<sub>3</sub>O)H<sup>+</sup> = 414.253989u

Observed Mass = 414.253297u

Difference = -1.7 ppm

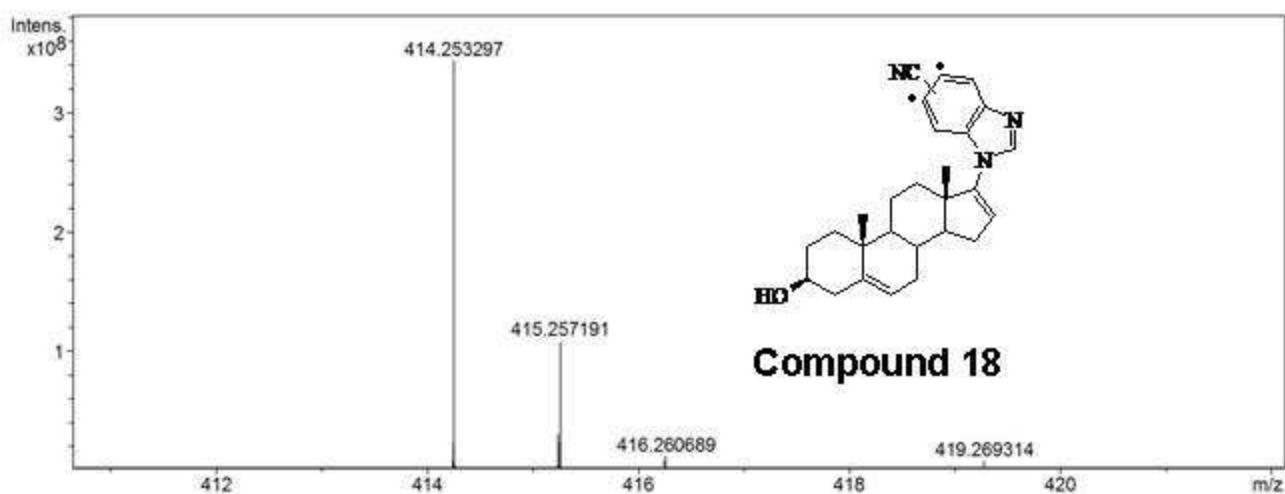

| m/z        | I         |
|------------|-----------|
| 207.126701 | 4337469   |
| 207.128455 | 2215349   |
| 207.129525 | 1581085   |
| 215.089036 | 8511228   |
| 231.062976 | 7850492   |
| 277.011287 | 2583461   |
| 277.013816 | 1696005   |
| 277.020245 | 1632293   |
| 285.130902 | 4250548   |
| 301.104836 | 6320597   |
| 397.191074 | 1913074   |
| 405.253657 | 5370636   |
| 413.222364 | 2013990   |
| 414.242579 | 1509161   |
| 414.244566 | 8293673   |
| 414.247990 | 1461545   |
| 414.249367 | 4661033   |
| 414.251438 | 110091049 |
| 414.253297 | 343300905 |
| 414.254584 | 13818665  |
| 414.255045 | 8760105   |

### SAMPLE INFORMATION

|                   |                   |                     |                       |
|-------------------|-------------------|---------------------|-----------------------|
| Sample Name:      | VNPT187A          | Acquired By:        | System                |
| Sample Type:      | Unknown           | Date Acquired:      | 4/13/2012 2:13:13 AM  |
| Vial:             | 27                | Acq. Method Set:    | VN124                 |
| Injection #:      | 1                 | Date Processed:     | 4/13/2012 11:28:42 AM |
| Injection Volume: | 20.00 ul          | Processing Method:  | VN124venky            |
| Run Time:         | 30.0 Minutes      | Channel Name:       | WIn Ch1               |
| Sample Set Name:  | Puru Sample Set 2 | Proc. Chnl. Descr.: | FDA 242.7 nm          |

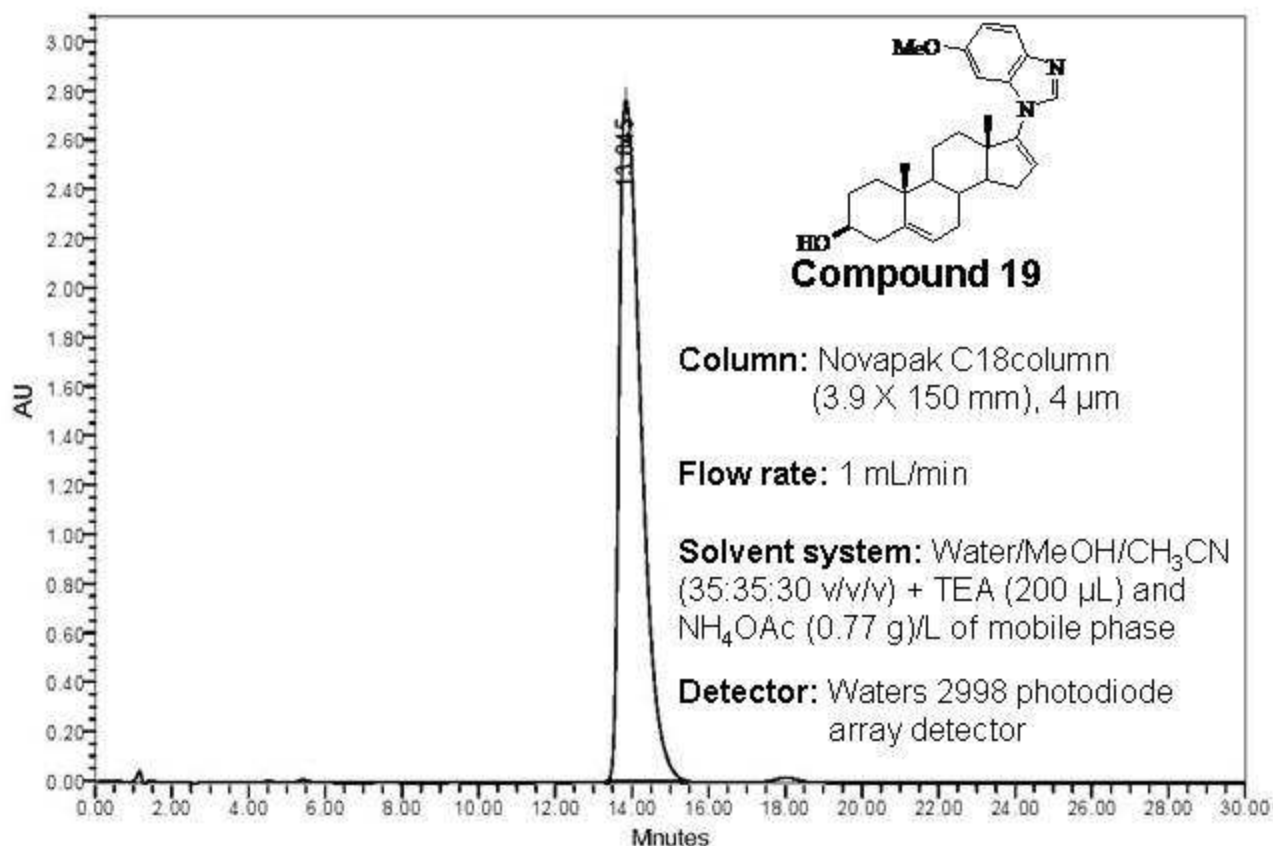

**PDA Result Table**

| Name | RT     | Area      | Purity (#1) Angle | Purity (#1) Threshold | Purity Flag | Match (#1) Spect. Name | Match (#1) Angle | Match (#1) Threshold | PDA Match Flag |
|------|--------|-----------|-------------------|-----------------------|-------------|------------------------|------------------|----------------------|----------------|
| 1    | 13.845 | 109561301 |                   |                       | No          |                        |                  |                      | No             |

| Name | Retention Time (min) | Purity1 Angle | Purity1 Threshold | PDA Match1 Spect. Name | PDA Match1 Angle | PDA Match1 Threshold | PDA Match1 Lib. Name | Area (μV*sec) | % Area | Height (μV) | Int Type | Amount |
|------|----------------------|---------------|-------------------|------------------------|------------------|----------------------|----------------------|---------------|--------|-------------|----------|--------|
| 1    | 13.845               |               |                   |                        |                  |                      |                      | 109561301     | 100.00 | 2761138     | bb       |        |



# Mass Spectrum List Report

## Analysis Info

Analysis Name VNPT187A\_pos\_000001.d  
Method XMASS\_Method  
Sample Name: VNPT187A\_pos  
VNPT187A\_pos: in 1:1 THF:MeOH w/ NaCl

Acquisition Date 3/20/2012 11:59:30 AM  
Operator FTMS\_USER  
Instrument apex-Qe

## Acquisition Parameter

Sample: VNPT187A

Exact Mass of (C<sub>27</sub>H<sub>34</sub>N<sub>2</sub>O<sub>2</sub>)Na<sup>+</sup> = 441.251249u

Observed Mass = 441.250747u

Difference = -1.1 ppm

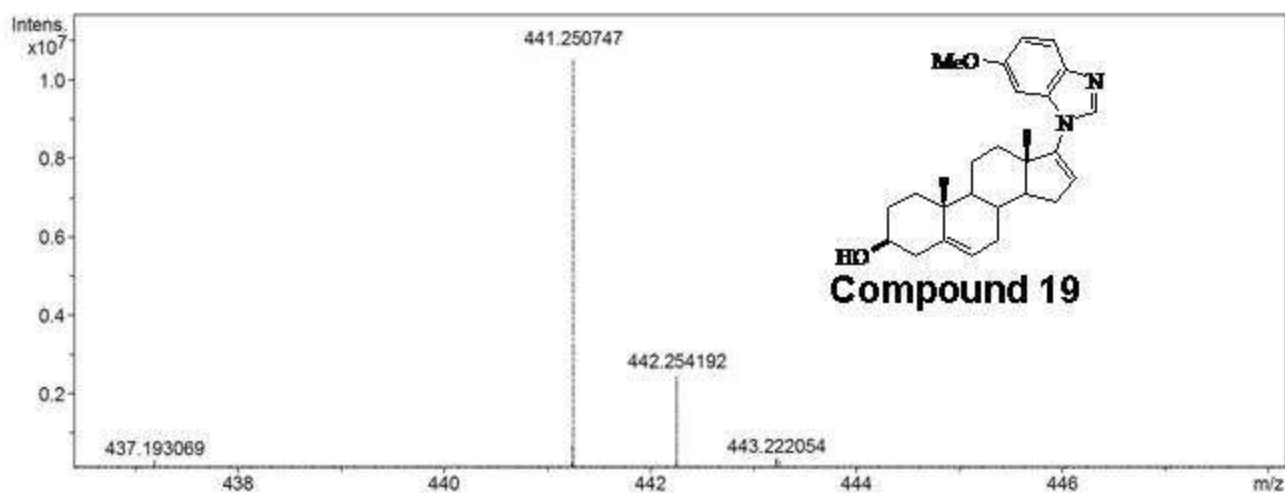

| m/z        | I         |
|------------|-----------|
| 209.637209 | 1277661   |
| 215.088640 | 5082059   |
| 215.088862 | 39289163  |
| 215.089088 | 3149387   |
| 215.089208 | 1519403   |
| 216.092282 | 2614315   |
| 231.062858 | 1213227   |
| 270.519635 | 3796859   |
| 288.289493 | 16748969  |
| 289.292912 | 2627244   |
| 310.271487 | 1429486   |
| 316.320766 | 8756739   |
| 317.324173 | 1284359   |
| 413.211522 | 2652484   |
| 413.265839 | 3925828   |
| 419.258192 | 1587540   |
| 419.264983 | 1192788   |
| 419.265443 | 1809748   |
| 419.266760 | 8172372   |
| 419.267792 | 17296212  |
| 419.268571 | 229661524 |

**SAMPLE INFORMATION**

|                   |              |                     |                       |
|-------------------|--------------|---------------------|-----------------------|
| Sample Name:      | VNLT103      | Acquired By:        | System                |
| Sample Type:      | Unknown      | Date Acquired:      | 4/17/2012 11:46:21 AM |
| Vial:             | 30           | Acq. Method Set:    | VN124                 |
| Injection #:      | 1            | Date Processed:     | 4/17/2012 12:12:35 PM |
| Injection Volume: | 10.00 ul     | Processing Method:  | VN124venky            |
| Run Time:         | 20.0 Minutes | Channel Name:       | WWin Ch1              |
| Sample Set Name:  |              | Proc. Chnl. Descr.: | FDA 253.4 nm          |

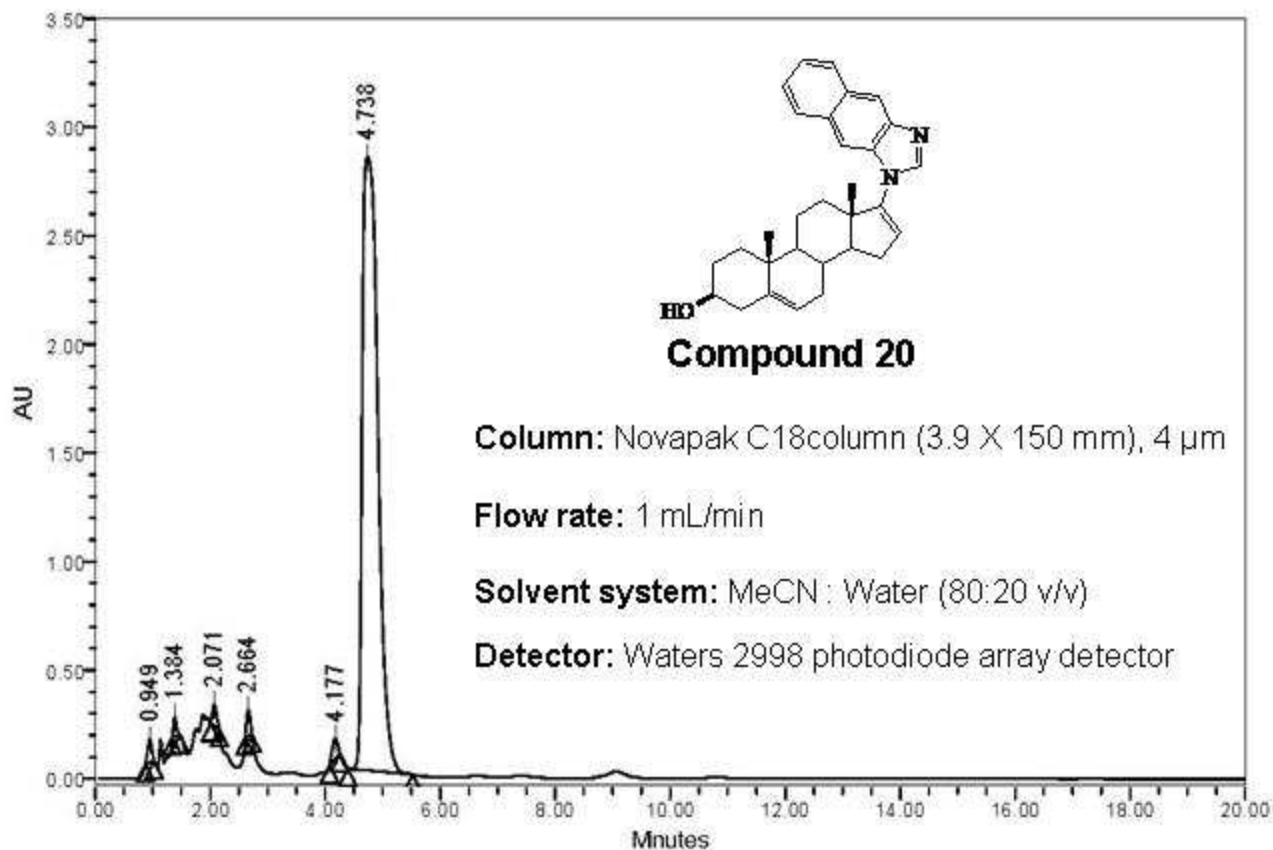

**PDA Result Table**

| Name | Retention Time (min) | Purity1 Angle | Purity1 Threshold | PDA Match1 Spect. Name | PDA Match1 Angle | PDA Match1 Threshold | PDA Match1 Lib. Name | Area (μV*sec) | % Area | Height (μV) | Int Type | Amount |
|------|----------------------|---------------|-------------------|------------------------|------------------|----------------------|----------------------|---------------|--------|-------------|----------|--------|
| 1    | 0.949                |               |                   |                        |                  |                      |                      | 531560        | 0.95   | 107993      | bb       |        |
| 2    | 1.384                |               |                   |                        |                  |                      |                      | 328823        | 0.59   | 89008       | bb       |        |
| 3    | 2.071                |               |                   |                        |                  |                      |                      | 486019        | 0.87   | 97144       | bb       |        |
| 4    | 2.664                |               |                   |                        |                  |                      |                      | 511337        | 0.92   | 119703      | bb       |        |
| 5    | 4.177                |               |                   |                        |                  |                      |                      | 608542        | 1.09   | 92684       | bb       |        |
| 6    | 4.738                |               |                   |                        |                  |                      |                      | 53212442      | 95.57  | 2821779     | bb       |        |
| 6    | 4.738                | 53212442      |                   |                        | No               |                      |                      |               | No     |             |          |        |

## Mass Spectrum List Report

### Analysis Info

Analysis Name VNLT-103\_pos\_000001.d

Method XMASS\_Method

Sample Name: VNLT-103\_pos

VNLT-103\_pos: in 1:1 THF:MeOH w/ NaCl.

Acquisition Date 12/13/2010 3:05:09 PM

Operator FTMS\_USER

Instrument apex-Qe

### Acquisition Parameter

Sample Name: VNLT-103

Exact Mass of (C<sub>30</sub>H<sub>34</sub>N<sub>2</sub>O)Na<sup>+</sup>: 461.256350u

Observed Mass: 461.257018u

Difference: 1.5 ppm

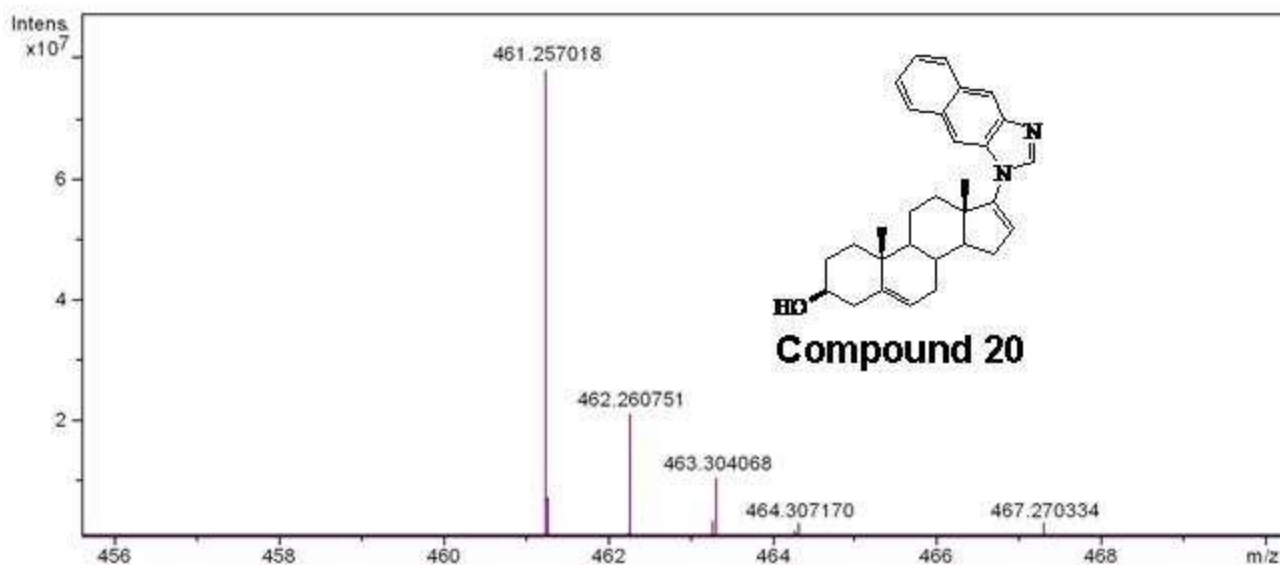

| #  | m/z        | I         |
|----|------------|-----------|
| 1  | 437.194422 | 10919097  |
| 2  | 439.271531 | 36199628  |
| 3  | 439.275009 | 197373133 |
| 4  | 439.277670 | 9440461   |
| 5  | 439.278693 | 5455053   |
| 6  | 440.275437 | 18947286  |
| 7  | 440.278470 | 64466134  |
| 8  | 441.281875 | 10353888  |
| 9  | 461.254853 | 20049346  |
| 10 | 461.257018 | 78360002  |
| 11 | 461.258911 | 7368130   |
| 12 | 462.257447 | 6120911   |
| 13 | 462.260751 | 21302735  |
| 14 | 463.304068 | 10739164  |
| 15 | 489.252458 | 18485058  |
| 16 | 490.255652 | 5525328   |
| 17 | 505.247336 | 5511212   |
| 18 | 507.330416 | 21573706  |
| 19 | 508.333743 | 6129753   |
| 20 | 529.280941 | 10645891  |
| 21 | 529.283634 | 39874947  |
| 22 | 530.286910 | 14201233  |
| 23 | 540.302036 | 14971412  |

**SAMPLE INFORMATION**

Sample Name: VNFP39  
 Sample Type: Unknown  
 Vial: 20  
 Injection #: 1  
 Injection Volume: 10.00 ul  
 Run Time: 10.0 Mnutes  
 Sample Set Name:

Acquired By: System  
 Date Acquired: 4/17/2012 5:44:59 PM  
 Acq. Method Set: VN124  
 Date Processed: 4/17/2012 5:59:38 PM  
 Processing Method: VN124venky  
 Channel Name: WWin Ch1  
 Proc. Chnl. Descr.: FDA 242.7 nm

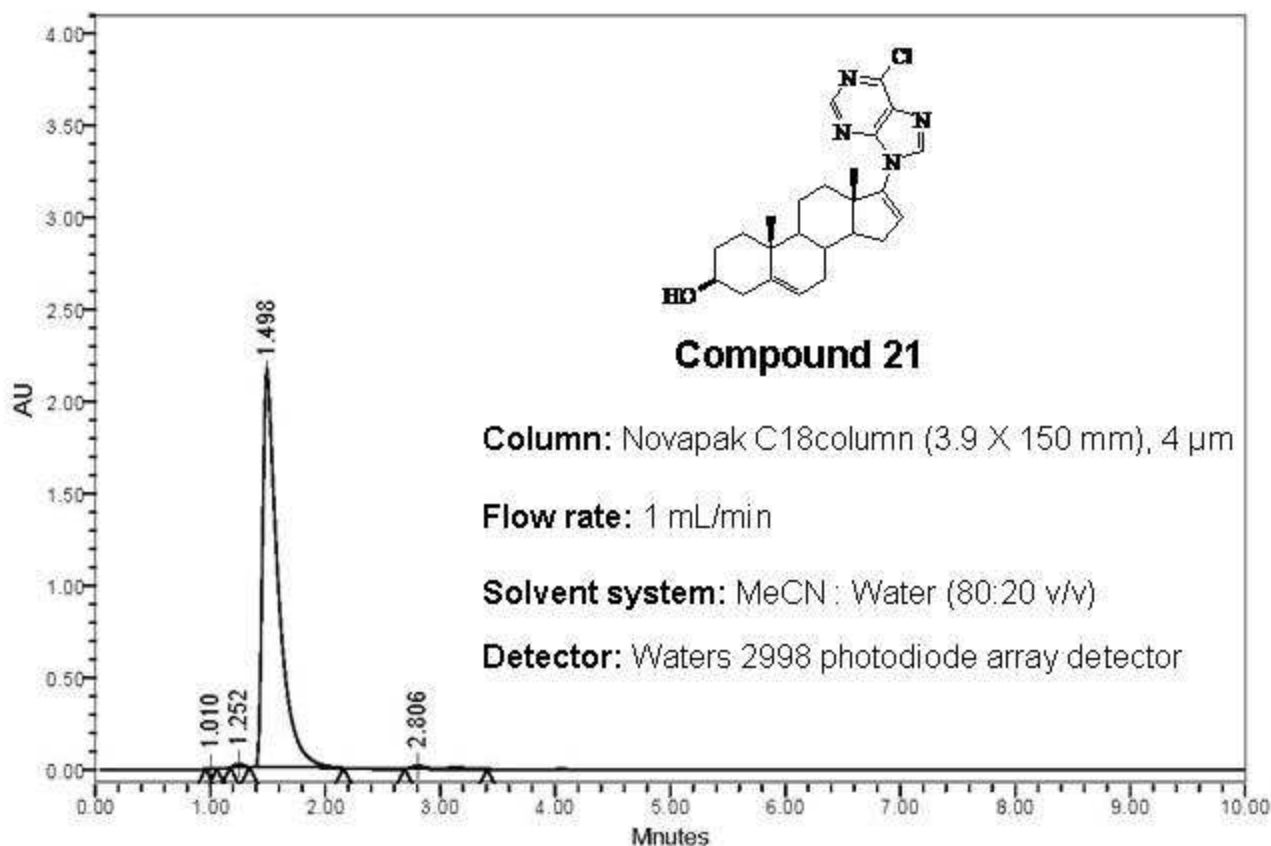

**PDA Result Table**

| Name | Retention Time (min) | Purity1 Angle | Purity1 Threshold | PDA Match1 Spect. Name | PDA Match1 Angle | PDA Match1 Threshold | PDA Match1 Lib. Name | Area (μV*sec) | % Area | Height (μV) | Int Type | Amount |
|------|----------------------|---------------|-------------------|------------------------|------------------|----------------------|----------------------|---------------|--------|-------------|----------|--------|
| 1    | 1.010                |               |                   |                        |                  |                      |                      | 18739         | 0.09   | 5560        | bb       |        |
| 2    | 1.252                |               |                   |                        |                  |                      |                      | 96373         | 0.47   | 18627       | bb       |        |
| 3    | 1.498                |               |                   |                        |                  |                      |                      | 20236004      | 98.21  | 2182717     | bb       |        |
| 4    | 2.806                |               |                   |                        |                  |                      |                      | 254360        | 1.23   | 15767       | bb       |        |
| 4    | 2.806                | 254360        |                   |                        | No               |                      |                      |               | No     |             |          |        |

# Mass Spectrum List Report

## Analysis Info

Analysis Name VNPP39\_pos\_000002.d  
Method XMASS\_Method  
Sample Name: VNPP39\_pos  
VNPP39\_pos: in 1:1 THF:MeOH w/ NaCl.

Acquisition Date 12/13/2010 9:30:30 AM  
Operator FTMS\_USER  
Instrument apex-Qe

## Acquisition Parameter

Sample Name: VNPP39  
Exact Mass of (C<sub>24</sub>H<sub>29</sub>ClN<sub>4</sub>O)<sub>2</sub>Na<sup>+</sup>: 871.395200u  
Observed Mass: 871.397222u  
Difference: 2.3 ppm

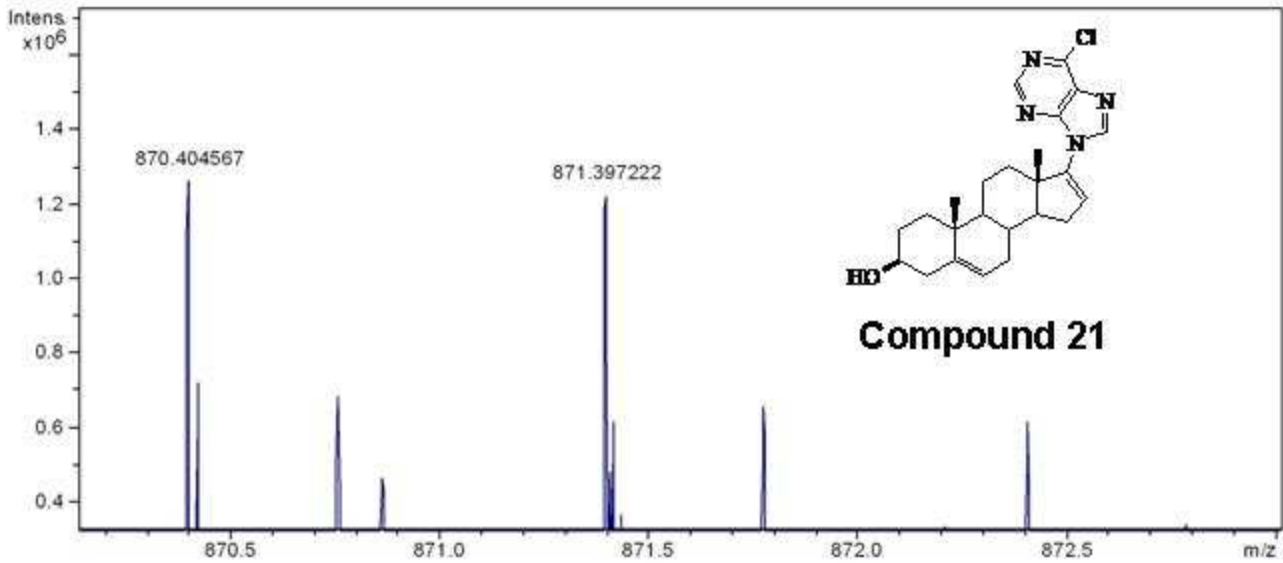

| #  | m/z        | I        |
|----|------------|----------|
| 1  | 99.184985  | 3542938  |
| 2  | 99.185669  | 3037728  |
| 3  | 99.185994  | 5406510  |
| 4  | 99.186475  | 2818354  |
| 5  | 99.453074  | 2867801  |
| 6  | 99.453612  | 44023753 |
| 7  | 99.453821  | 16366319 |
| 8  | 99.454003  | 6816989  |
| 9  | 99.454145  | 12029385 |
| 10 | 99.454293  | 8032589  |
| 11 | 99.454580  | 4681961  |
| 12 | 107.305349 | 2956982  |
| 13 | 107.305676 | 34732250 |
| 14 | 107.305868 | 17211162 |
| 15 | 107.306174 | 35874138 |
| 16 | 107.556313 | 2485458  |
| 17 | 129.448204 | 6045547  |
| 18 | 129.448776 | 8152491  |
| 19 | 129.449287 | 2872347  |
| 20 | 136.518144 | 2742312  |
| 21 | 143.074745 | 22627634 |
| 22 | 143.076532 | 47352114 |
| 23 | 143.076995 | 7450674  |

### SAMPLE INFORMATION

|                            |                                      |
|----------------------------|--------------------------------------|
| Sample Name: VNFP59        | Acquired By: System                  |
| Sample Type: Unknown       | Date Acquired: 4/16/2012 1:37:35 PM  |
| Vial: 19                   | Acq. Method Set: VN124               |
| Injection #: 1             | Date Processed: 4/16/2012 2:17:34 PM |
| Injection Volume: 20.00 ul | Processing Method: VN124venky        |
| Run Time: 30.0 Minutes     | Channel Name: WIn Ch1                |
| Sample Set Name:           | Proc. Chnl. Descr.: FDA 280.5 nm     |

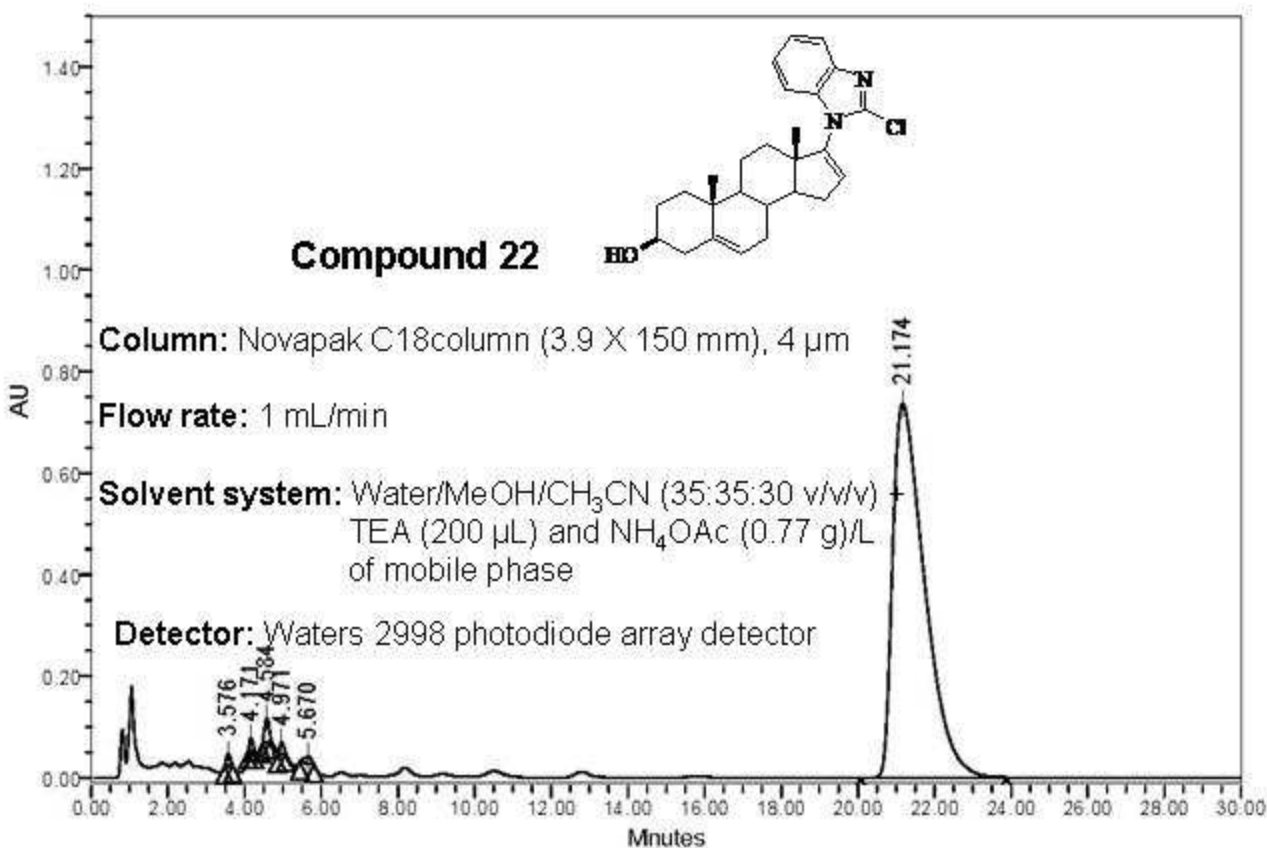

**PDA Result Table**

| Name | Retention Time (min) | Purity1 Angle | Purity1 Threshold | PDA Match1 Spect. Name | PDA Match1 Angle | PDA Match1 Threshold | PDA Match1 Lib. Name | Area (μV*sec) | % Area | Height (μV) | Int Type | Amount |
|------|----------------------|---------------|-------------------|------------------------|------------------|----------------------|----------------------|---------------|--------|-------------|----------|--------|
| 1    | 3.576                |               |                   |                        |                  |                      |                      | 175488        | 0.40   | 23050       | bb       |        |
| 2    | 4.171                |               |                   |                        |                  |                      |                      | 160111        | 0.37   | 25692       | bb       |        |
| 3    | 4.584                |               |                   |                        |                  |                      |                      | 398089        | 0.91   | 47115       | bb       |        |
| 4    | 4.971                |               |                   |                        |                  |                      |                      | 185460        | 0.42   | 23414       | bb       |        |
| 5    | 5.670                |               |                   |                        |                  |                      |                      | 190574        | 0.44   | 13719       | bb       |        |
| 6    | 21.174               |               |                   |                        |                  |                      |                      | 42572398      | 97.46  | 736593      | bb       |        |
| 6    | 21.174               | 42572398      |                   |                        | No               |                      |                      |               |        | No          |          |        |

## Mass Spectrum List Report

### Analysis Info

Analysis Name VNPP59\_pos\_000002.d  
Method XMASS\_Method  
Sample Name: VNPP59\_pos  
VNPP59\_pos: in 1:1 THF:MeOH w/ NaCl.

Acquisition Date 12/13/2010 9:43:14 AM  
Operator FTMS\_USER  
Instrument apex-Qe

### Acquisition Parameter

Sample Name: VNPP59  
Exact Mass of (C<sub>26</sub>H<sub>31</sub>ClN<sub>2</sub>O)<sup>+</sup>: 445.201712u  
Observed Mass: 445.202093u  
Difference: < 1.0 ppm

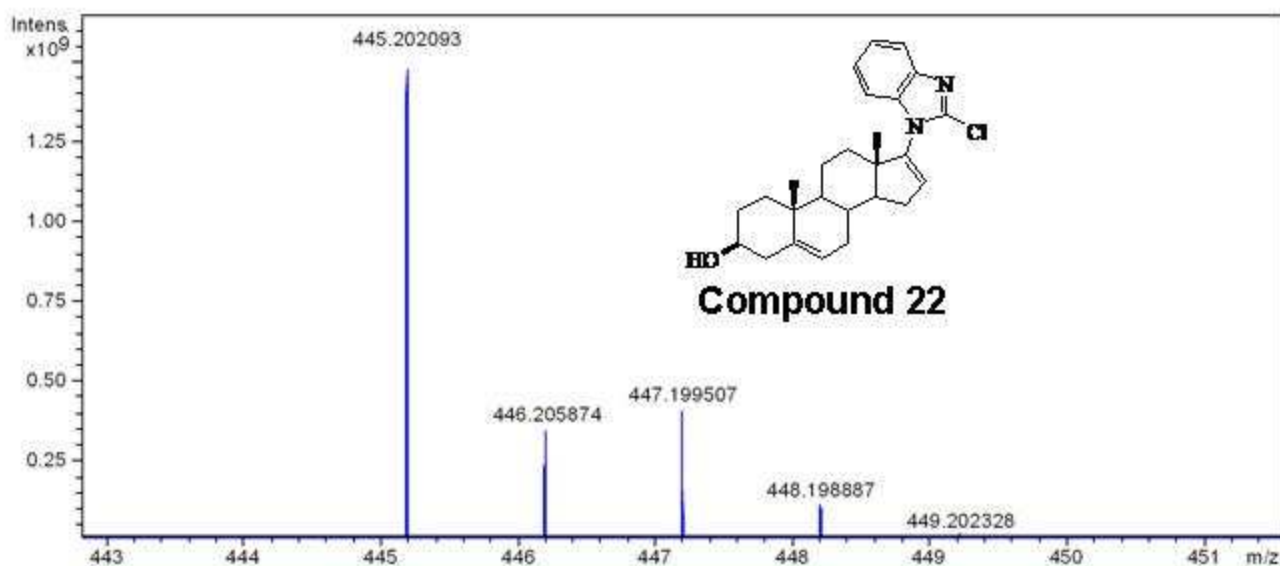

| #  | m/z        | I          |
|----|------------|------------|
| 1  | 413.263186 | 302941245  |
| 2  | 413.266736 | 610632765  |
| 3  | 414.266758 | 119604306  |
| 4  | 414.270408 | 147817554  |
| 5  | 423.216757 | 166266149  |
| 6  | 423.220701 | 325027109  |
| 7  | 424.220302 | 61932863   |
| 8  | 424.224006 | 90080575   |
| 9  | 425.213951 | 71566682   |
| 10 | 425.217651 | 112166234  |
| 11 | 445.196902 | 480085969  |
| 12 | 445.198174 | 490178513  |
| 13 | 445.200271 | 509970385  |
| 14 | 445.202093 | 1522632657 |
| 15 | 445.203601 | 191989713  |
| 16 | 445.204694 | 91424721   |
| 17 | 445.205767 | 56133585   |
| 18 | 446.201800 | 245401589  |
| 19 | 446.205874 | 352815093  |
| 20 | 447.195579 | 284723225  |
| 21 | 447.199507 | 412715033  |
| 22 | 447.201211 | 54593561   |
| 23 | 447.205035 | 47532057   |

**SAMPLE INFORMATION**

|                   |             |                     |                       |
|-------------------|-------------|---------------------|-----------------------|
| Sample Name:      | VNPT71      | Acquired By:        | System                |
| Sample Type:      | Unknown     | Date Acquired:      | 4/19/2012 12:55:10 PM |
| Vial:             | 8           | Acq. Method Set:    | VN124                 |
| Injection #:      | 1           | Date Processed:     | 4/19/2012 1:30:52 PM  |
| Injection Volume: | 10.00 ul    | Processing Method:  | VN124venky            |
| Run Time:         | 30.0 Mnutes | Channel Name:       | WVln Ch1              |
| Sample Set Name:  |             | Proc. Chnl. Descr.: | FDA 242.7 nm          |

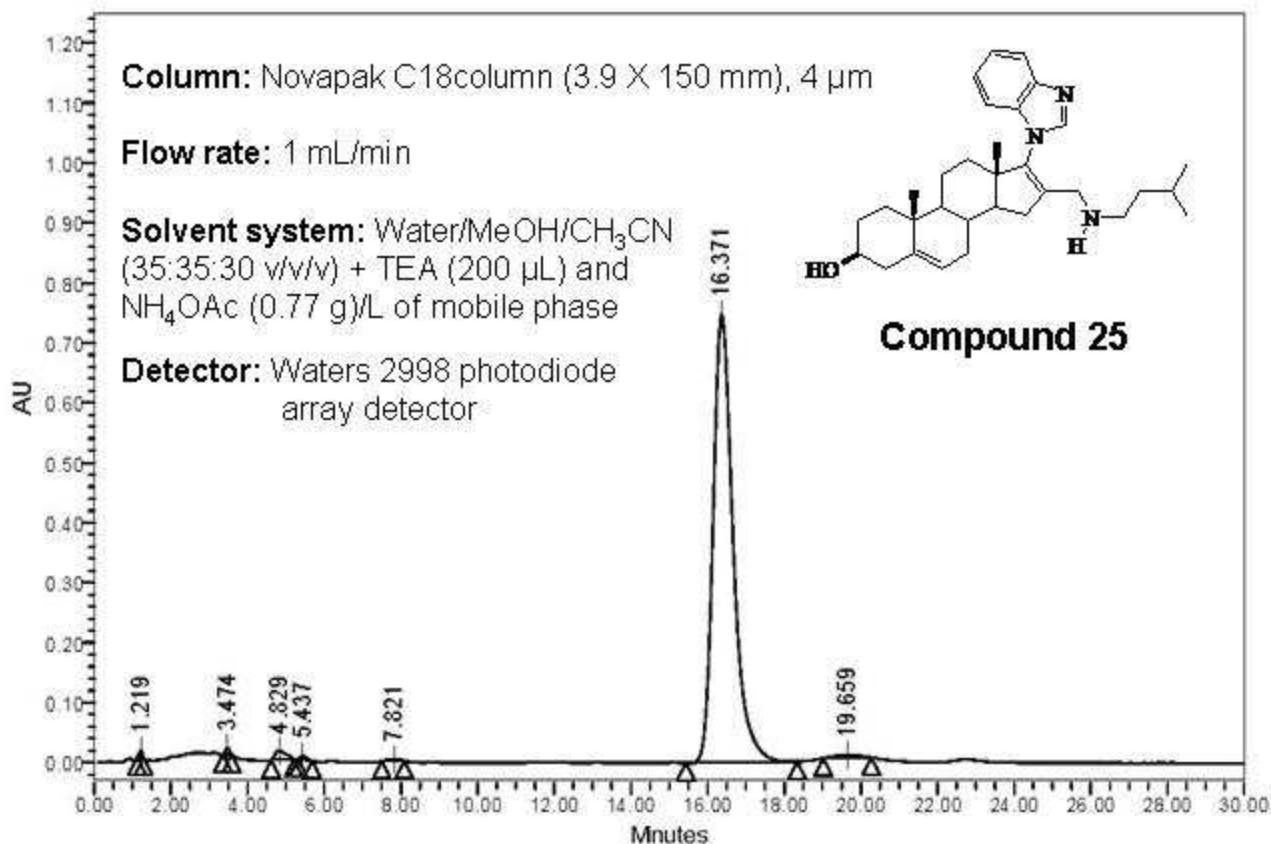

**PDA Result Table**

| Name | Retention Time (min) | Purity1 Angle | Purity1 Threshold | PDA Match1 Spect. Name | PDA Match1 Angle | PDA Match1 Threshold | PDA Match1 Lib. Name | Area (µV*sec) | % Area | Height (µV) | Int Type | Amount |
|------|----------------------|---------------|-------------------|------------------------|------------------|----------------------|----------------------|---------------|--------|-------------|----------|--------|
| 1    | 1.219                |               |                   |                        |                  |                      |                      | 60206         | 0.22   | 11525       | bb       |        |
| 2    | 3.474                |               |                   |                        |                  |                      |                      | 82996         | 0.30   | 10745       | bb       |        |
| 3    | 4.829                |               |                   |                        |                  |                      |                      | 295707        | 1.06   | 15150       | bb       |        |
| 4    | 5.437                |               |                   |                        |                  |                      |                      | 64475         | 0.23   | 5858        | bb       |        |
| 5    | 7.821                |               |                   |                        |                  |                      |                      | 65687         | 0.24   | 3017        | bb       |        |
| 6    | 16.371               |               |                   |                        |                  |                      |                      | 27032179      | 97.14  | 746417      | bb       |        |
| 7    | 19.659               |               |                   |                        |                  |                      |                      | 227051        | 0.82   | 4775        | bb       |        |
| 6    | 16.371               | 27032179      |                   |                        |                  | No                   |                      |               |        |             | No       |        |



# Mass Spectrum List Report

## Analysis Info

|                                     |                     |                  |                      |
|-------------------------------------|---------------------|------------------|----------------------|
| Analysis Name                       | VNPT71_pos_000001.d | Acquisition Date | 3/1/2010 10:54:23 AM |
| Method                              | XMASS_Method        | Operator         | FTMS_USER            |
| Sample Name:                        | VNPT71_pos          | Instrument       | apex-Qe              |
| VNPT71_pos: in 1:1 THF:MeOH w/ NaCl |                     |                  |                      |

Sample Name: VNPT71

Exact Mass of (C<sub>32</sub>H<sub>45</sub>N<sub>3</sub>O)Na<sup>+</sup> = 510.345484u

Observed Mass = 510.345095u

Difference = < -1.0 ppm

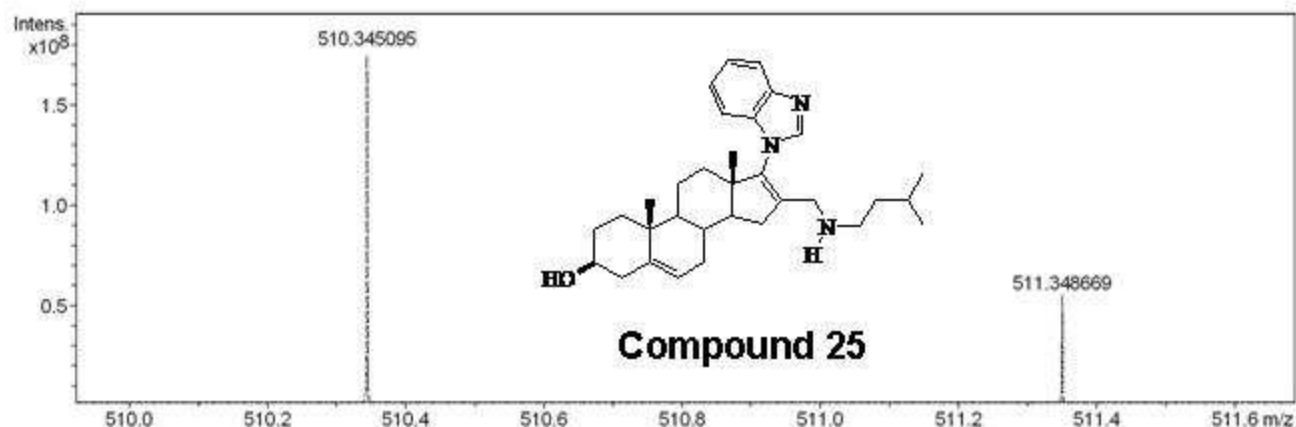

| #  | m/z        | I         |
|----|------------|-----------|
| 1  | 211.797033 | 6437307   |
| 2  | 212.363528 | 20741435  |
| 3  | 215.088084 | 10641562  |
| 4  | 215.088707 | 43305274  |
| 5  | 469.378734 | 8267224   |
| 6  | 488.363169 | 574656097 |
| 7  | 488.364171 | 53333601  |
| 8  | 488.364845 | 22531681  |
| 9  | 488.365489 | 12303969  |
| 10 | 488.366118 | 8089185   |
| 11 | 489.364160 | 9109096   |
| 12 | 489.364665 | 7872104   |
| 13 | 489.366524 | 186617448 |
| 14 | 490.370124 | 24776303  |
| 15 | 500.362103 | 13508277  |
| 16 | 500.363300 | 65736373  |
| 17 | 501.366849 | 21163708  |
| 18 | 508.389666 | 17800941  |
| 19 | 510.342453 | 6648570   |
| 20 | 510.345095 | 176688890 |
| 21 | 510.346908 | 8974074   |
| 22 | 511.348669 | 55381761  |

Reported by User: System

Project Name: FDA\_Default

**SAMPLE INFORMATION**

Sample Name: VNPT72  
 Sample Type: Unknown  
 Vial: 9  
 Injection #: 1  
 Injection Volume: 20.00 ul  
 Run Time: 30.0 Mnutes  
 Sample Set Name: Furu Sample Set 2

Acquired By: System  
 Date Acquired: 4/12/2012 4:50:33 PM  
 Acq. Method Set: VN124  
 Date Processed: 4/12/2012 5:43:12 PM  
 Processing Method: VN124venky  
 Channel Name: WIn Ch1  
 Proc. Chnl. Descr.: FDA 242.7 nm

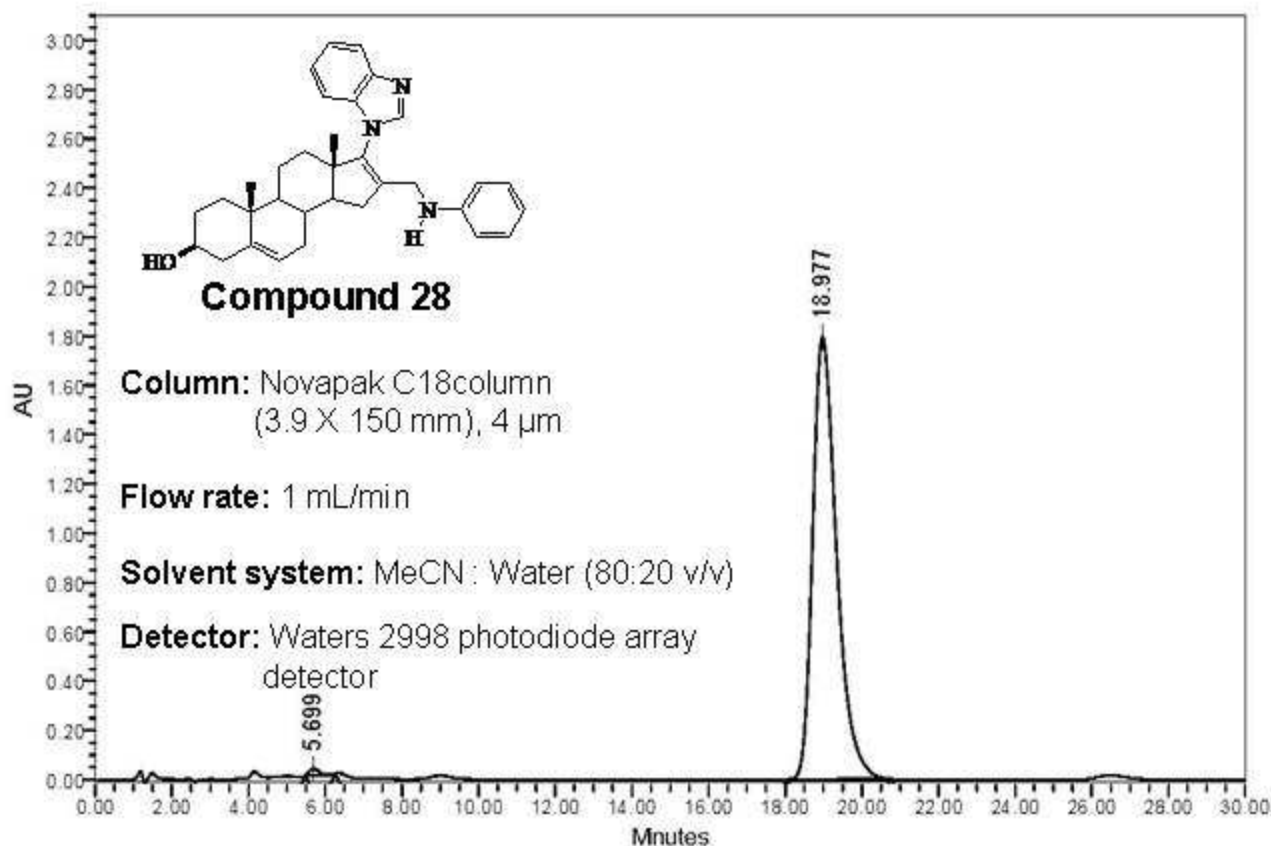

**PDA Result Table**

| Name | RT     | Area     | Purity (#1) Angle | Purity (#1) Threshold | Purity Flag | Match (#1) Spect. Name | Match (#1) Angle | Match (#1) Threshold | PDA Match Flag |
|------|--------|----------|-------------------|-----------------------|-------------|------------------------|------------------|----------------------|----------------|
| 1    | 5.699  | 497110   |                   |                       | No          |                        |                  |                      | No             |
| 2    | 18.977 | 77612908 |                   |                       | No          |                        |                  |                      | No             |

| Name | Retention Time (min) | Purity1 Angle | Purity1 Threshold | PDA Match1 Spect. Name | PDA Match1 Angle | PDA Match1 Threshold | PDA Match1 Lib. Name | Area (μV*sec) | % Area | Height (μV) | Int Type | Amount |
|------|----------------------|---------------|-------------------|------------------------|------------------|----------------------|----------------------|---------------|--------|-------------|----------|--------|
| 1    | 5.699                |               |                   |                        |                  |                      |                      | 497110        | 0.64   | 25559       | bb       |        |
| 2    | 18.977               |               |                   |                        |                  |                      |                      | 77612908      | 99.36  | 1794102     | bb       |        |

# Mass Spectrum List Report

## Analysis Info

Analysis Name VNPT72\_pos\_000001.d Acquisition Date 3/1/2010 11:00:00 AM  
Method XMASS\_Method Operator FTMS\_USER  
Sample Name: VNPT72\_pos Instrument apex-Qe  
VNPT72\_pos: in 1:1 THF:MeOH w/ NaCl

Sample Name: VNPT72

Exact Mass of (C<sub>33</sub>H<sub>39</sub>N<sub>3</sub>O)Na<sup>+</sup> = 516.298534u

Observed Mass = 516.298133u

Difference = < -1.0 ppm

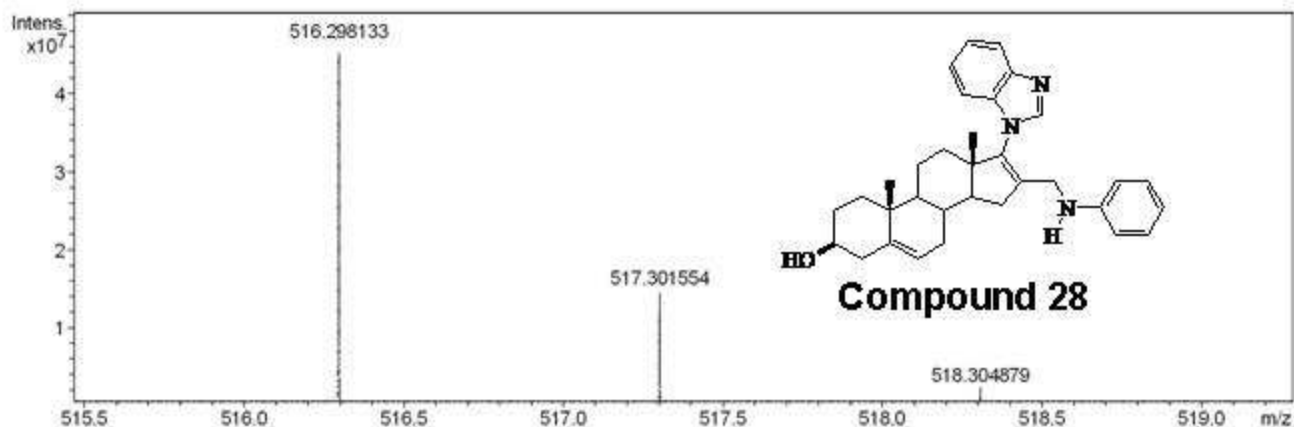

| #  | m/z        | I         |
|----|------------|-----------|
| 1  | 208.542848 | 5053828   |
| 2  | 209.078912 | 21073955  |
| 3  | 213.073022 | 3912097   |
| 4  | 215.088125 | 20083487  |
| 5  | 215.088638 | 72098079  |
| 6  | 216.092021 | 5912607   |
| 7  | 231.083607 | 3138334   |
| 8  | 231.119985 | 3176286   |
| 9  | 245.098553 | 4383474   |
| 10 | 245.099293 | 8099890   |
| 11 | 494.310209 | 2711484   |
| 12 | 494.310857 | 3752380   |
| 13 | 494.311509 | 4743612   |
| 14 | 494.314377 | 38997436  |
| 15 | 494.315937 | 561417660 |
| 16 | 494.316981 | 63049148  |
| 17 | 494.317641 | 25628092  |
| 18 | 494.318283 | 13630908  |
| 19 | 494.318940 | 8752572   |
| 20 | 494.319569 | 5909948   |
| 21 | 494.320228 | 4488636   |
| 22 | 494.320854 | 3342780   |

**SAMPLE INFORMATION**

Sample Name: VNPT85  
 Sample Type: Unknown  
 Vial: 10  
 Injection #: 1  
 Injection Volume: 20.00 ul  
 Run Time: 30.0 Minutes  
 Sample Set Name: Furu Sample Set 2

Acquired By: System  
 Date Acquired: 4/12/2012 5:21:50 PM  
 Acq. Method Set: VN124  
 Date Processed: 4/12/2012 6:09:21 PM  
 Processing Method: VN124venky  
 Channel Name: WWin Ch1  
 Proc. Chnl. Descr.: FDA 242.7 nm

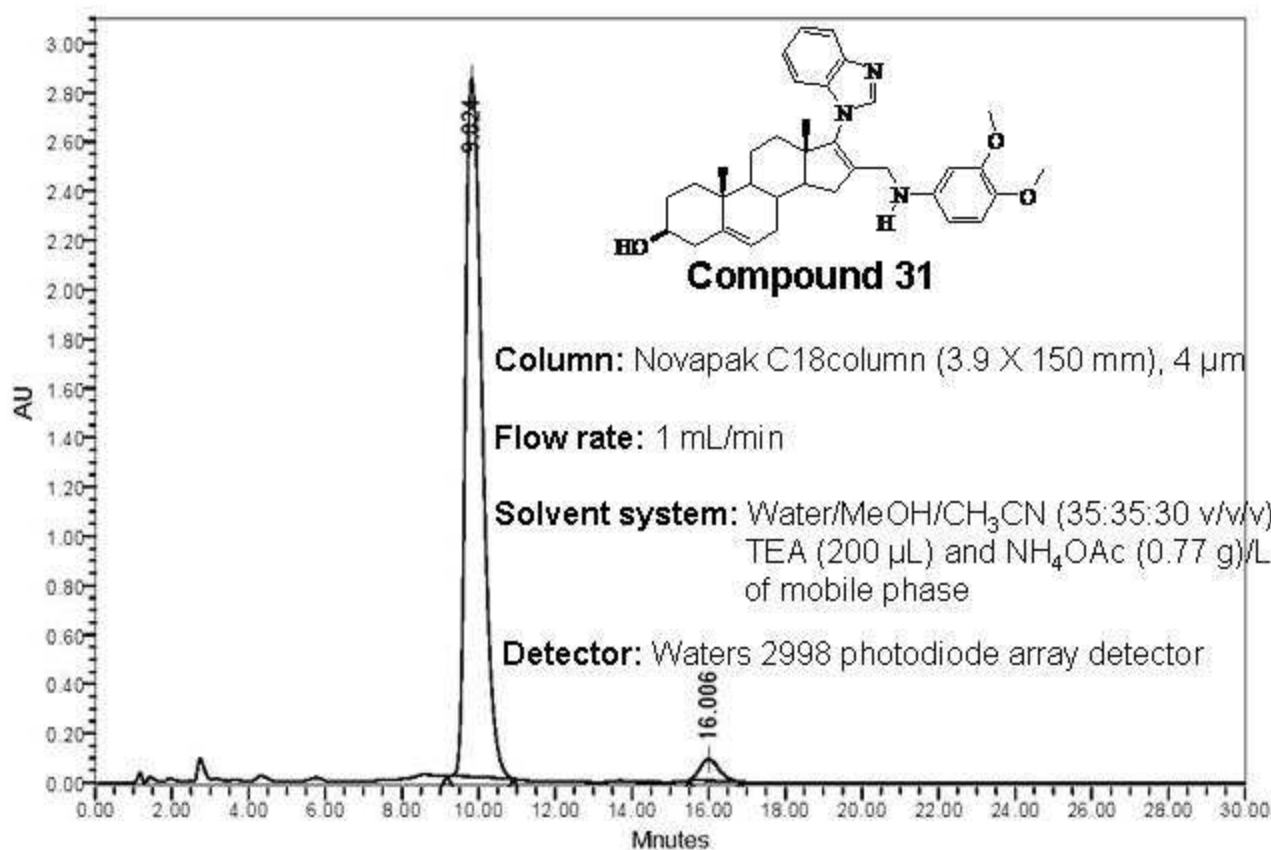

**PDA Result Table**

| Name | RT     | Area     | Purity (#1) Angle | Purity (#1) Threshold | Purity Flag | Match (#1) Spect. Name | Match (#1) Angle | Match (#1) Threshold | PDA Match Flag |
|------|--------|----------|-------------------|-----------------------|-------------|------------------------|------------------|----------------------|----------------|
| 1    | 9.824  | 85109342 |                   |                       | No          |                        |                  |                      | No             |
| 2    | 16.006 | 2948948  |                   |                       | No          |                        |                  |                      | No             |

| Name | Retention Time (min) | Purity1 Angle | Purity1 Threshold | PDA Match1 Spect. Name | PDA Match1 Angle | PDA Match1 Threshold | PDA Match1 Lib. Name | Area (μV*sec) | % Area | Height (μV) | Int Type | Amount |
|------|----------------------|---------------|-------------------|------------------------|------------------|----------------------|----------------------|---------------|--------|-------------|----------|--------|
| 1    | 9.824                |               |                   |                        |                  |                      |                      | 85109342      | 96.65  | 2831130     | bb       |        |
| 2    | 16.006               |               |                   |                        |                  |                      |                      | 2948948       | 3.35   | 86580       | bb       |        |

## Mass Spectrum List Report

### Analysis Info

Analysis Name VNPT85\_pos\_000001.d  
Method XMASS\_Method  
Sample Name: VNPT85\_pos  
VNPT85\_pos: in 1:1 THF:MeOH w/ NaCl.

Acquisition Date 12/13/2010 9:58:53 AM  
Operator FTMS\_USER  
Instrument apex-Qe

### Acquisition Parameter

Sample Name: VNPT85  
Exact Mass of (C<sub>35</sub>H<sub>43</sub>N<sub>3</sub>O<sub>3</sub>)Na<sup>+</sup>: 576.319663u  
Observed Mass: 576.318827u  
Difference: -1.5 ppm

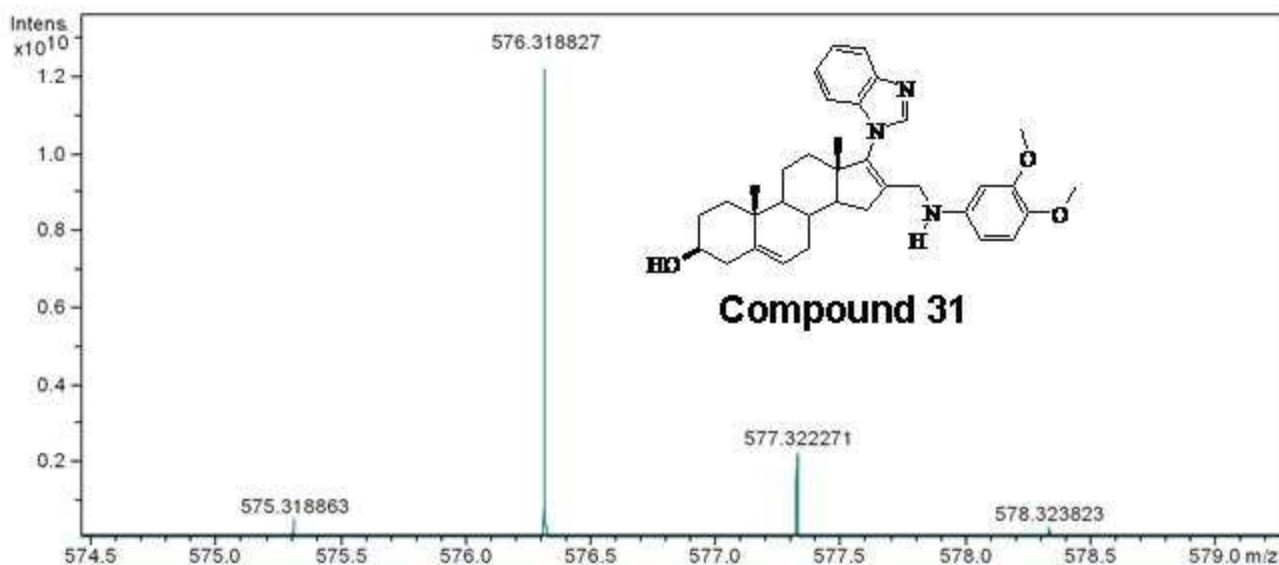

| #  | m/z        | I         |
|----|------------|-----------|
| 1  | 104.559218 | 33793815  |
| 2  | 115.265512 | 208863415 |
| 3  | 115.305605 | 136110263 |
| 4  | 115.345740 | 42790071  |
| 5  | 144.082437 | 58001569  |
| 6  | 189.603830 | 54713133  |
| 7  | 189.712316 | 34044719  |
| 8  | 191.888100 | 42187618  |
| 9  | 191.999087 | 163289957 |
| 10 | 191.999533 | 45611877  |
| 11 | 192.221687 | 436902762 |
| 12 | 192.332870 | 101170029 |
| 13 | 192.333198 | 148314989 |
| 14 | 288.164855 | 109355579 |
| 15 | 553.410476 | 43231973  |
| 16 | 554.332671 | 121481968 |
| 17 | 554.335691 | 302820080 |
| 18 | 554.338815 | 117811952 |
| 19 | 555.263893 | 38873850  |
| 20 | 555.335906 | 44018427  |
| 21 | 555.338877 | 93498107  |
| 22 | 555.343306 | 44083963  |
| 23 | 574.321872 | 53701486  |

Reported by User: System

Project Name: FDA\_Default

**SAMPLE INFORMATION**

Sample Name: VNPT92  
 Sample Type: Unknown  
 Vial: 15  
 Injection #: 2  
 Injection Volume: 10.00 ul  
 Run Time: 30.0 Minutes  
 Sample Set Name:

Acquired By: System  
 Date Acquired: 4/19/2012 12:21:43 PM  
 Acq. Method Set: VN124  
 Date Processed: 4/19/2012 1:11:33 PM  
 Processing Method: VN124venky  
 Channel Name: W/in Ch1  
 Proc. Chnl. Descr.: FDA 242.7 nm

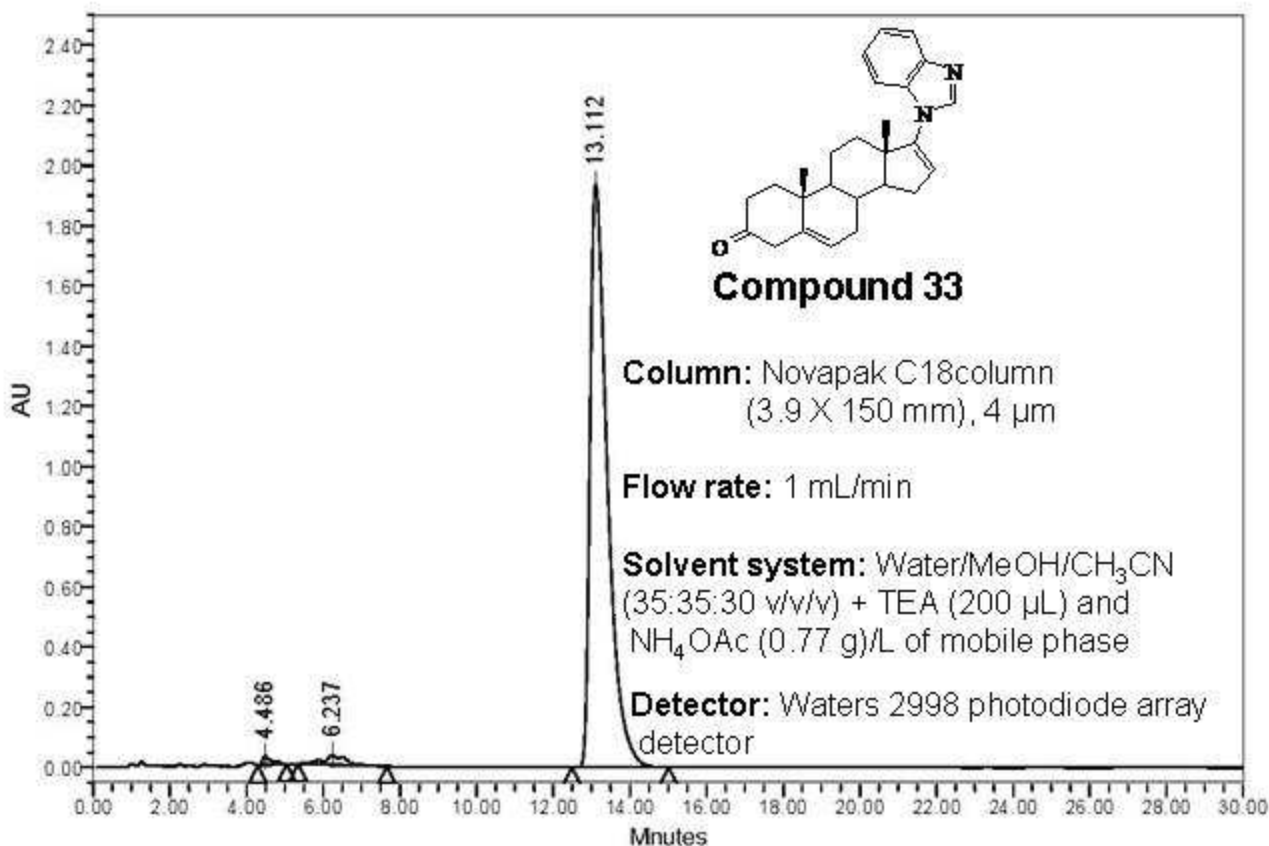

**PDA Result Table**

| Name | Retention Time (min) | Purity1 Angle | Purity1 Threshold | PDA Match1 Spect. Name | PDA Match1 Angle | PDA Match1 Threshold | PDA Match1 Lib. Name | Area (μV*sec) | % Area | Height (μV) | Int Type | Amount |
|------|----------------------|---------------|-------------------|------------------------|------------------|----------------------|----------------------|---------------|--------|-------------|----------|--------|
| 1    | 4.486                |               |                   |                        |                  |                      |                      | 487872        | 0.78   | 29481       | bb       |        |
| 2    | 6.237                |               |                   |                        |                  |                      |                      | 1308902       | 2.09   | 32125       | bb       |        |
| 3    | 13.112               |               |                   |                        |                  |                      |                      | 60874384      | 97.13  | 1938660     | bb       |        |
| 3    | 13.112               | 60874384      |                   |                        |                  | No                   |                      |               |        | No          |          |        |

## Mass Spectrum List Report

### Analysis Info

Analysis Name: VNPT92\_pos\_000001.d

Method: XMASS\_Method

Sample Name: VNPT92\_pos

VNPT92\_pos: in 1:1 THF:MeOH w/ NaCl.

Acquisition Date: 12/13/2010 2:56:24 PM

Operator: FTMS\_USER

Instrument: apex-Qe

### Acquisition Parameter

Sample Name: VNPT92

Exact Mass of (C<sub>26</sub>H<sub>30</sub>N<sub>2</sub>O)Na<sup>+</sup>: 409.225035u

Observed Mass: 409.22584u

Difference: 2.0 ppm

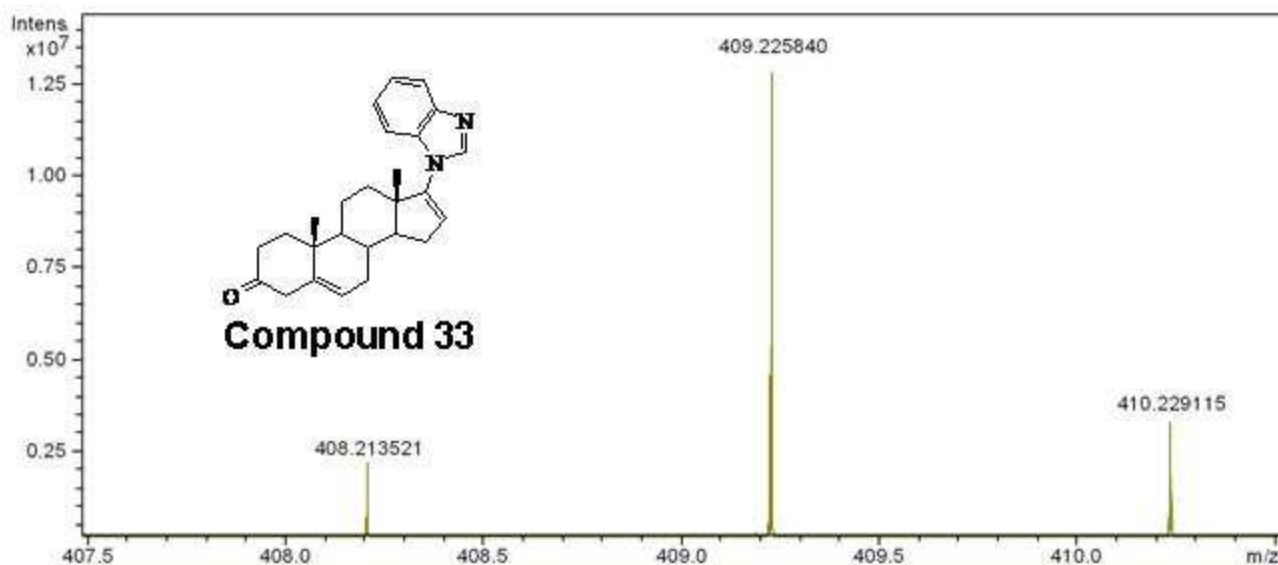

| #  | m/z        | I        |
|----|------------|----------|
| 1  | 137.090933 | 2302848  |
| 2  | 342.717283 | 2674180  |
| 3  | 368.135593 | 2290701  |
| 4  | 385.228031 | 2892305  |
| 5  | 387.241298 | 4228626  |
| 6  | 387.243645 | 9944594  |
| 7  | 388.247091 | 3527187  |
| 8  | 401.219969 | 2389537  |
| 9  | 401.222860 | 18296353 |
| 10 | 402.226480 | 7476771  |
| 11 | 403.238687 | 5930532  |
| 12 | 407.207573 | 3683884  |
| 13 | 407.210005 | 10640940 |
| 14 | 409.223325 | 4535857  |
| 15 | 409.225840 | 13131313 |
| 16 | 410.229115 | 3411507  |
| 17 | 413.267057 | 2642491  |
| 18 | 423.202097 | 2519645  |
| 19 | 423.204968 | 13635185 |
| 20 | 424.208468 | 3366497  |
| 21 | 425.220782 | 5736038  |
| 22 | 437.191570 | 3405472  |
| 23 | 437.194387 | 13807264 |

**SAMPLE INFORMATION**

Sample Name: VNPT88  
 Sample Type: Unknown  
 Vial: 12  
 Injection #: 1  
 Injection Volume: 5.00 ul  
 Run Time: 20.0 Minutes  
 Sample Set Name:

Acquired By: System  
 Date Acquired: 4/17/2012 4:18:02 PM  
 Acq. Method Set: VN124  
 Date Processed: 4/17/2012 4:44:33 PM  
 Processing Method: VN124venky  
 Channel Name: WIn Ch1  
 Proc. Chnl. Descr.: FDA 242.7 nm

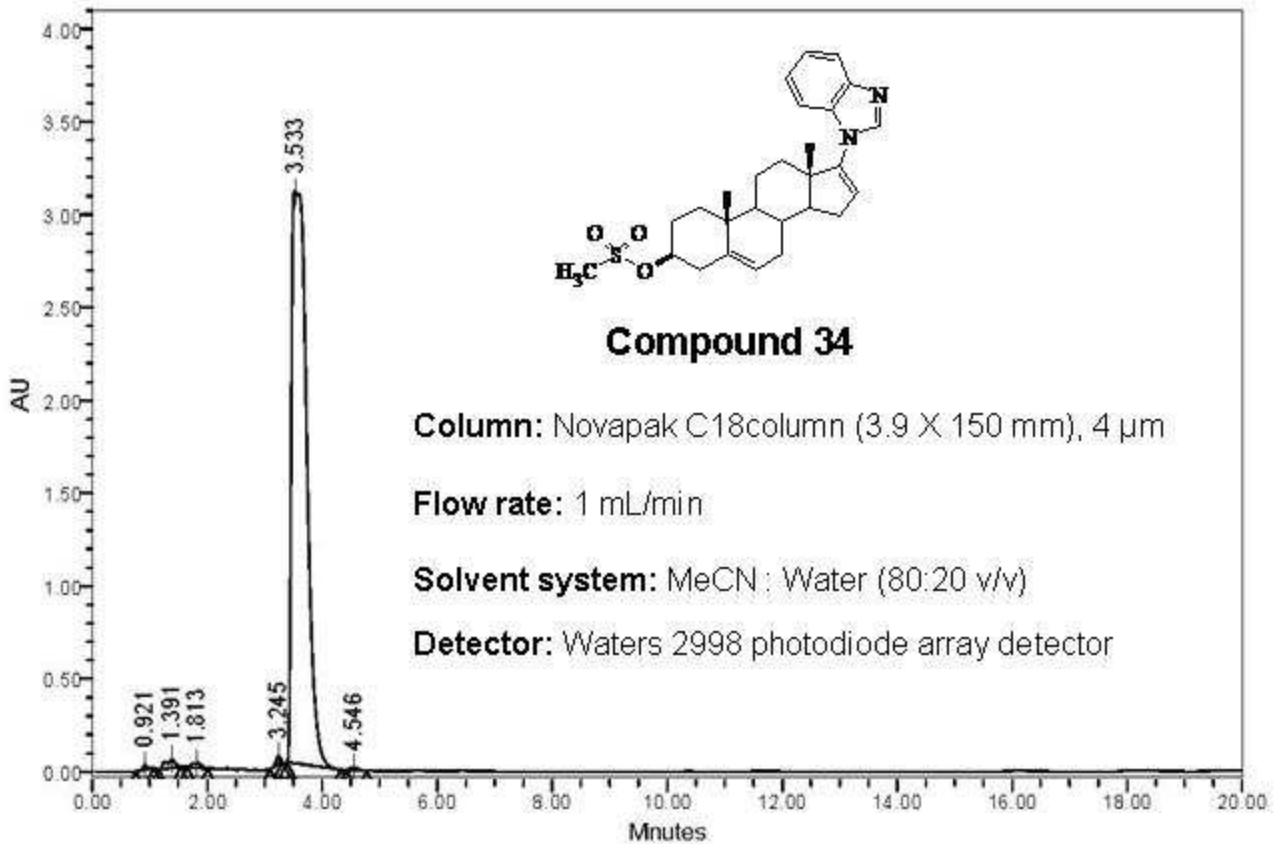

**PDA Result Table**

| Name | Retention Time (min) | Purity1 Angle | Purity1 Threshold | PDA Match1 Spect. Name | PDA Match1 Angle | PDA Match1 Threshold | PDA Match1 Lib. Name | Area (µV*sec) | % Area | Height (µV) | Int Type | Amount |
|------|----------------------|---------------|-------------------|------------------------|------------------|----------------------|----------------------|---------------|--------|-------------|----------|--------|
| 1    | 0.921                |               |                   |                        |                  |                      |                      | 111335        | 0.19   | 22065       | bb       |        |
| 2    | 1.391                |               |                   |                        |                  |                      |                      | 530162        | 0.92   | 46499       | bb       |        |
| 3    | 1.813                |               |                   |                        |                  |                      |                      | 287257        | 0.50   | 26807       | bb       |        |
| 4    | 3.245                |               |                   |                        |                  |                      |                      | 238659        | 0.41   | 42892       | bb       |        |
| 5    | 3.533                |               |                   |                        |                  |                      |                      | 56331766      | 97.75  | 3097112     | bb       |        |
| 6    | 4.546                |               |                   |                        |                  |                      |                      | 127688        | 0.22   | 14225       | bb       |        |
| 6    | 4.546                |               | 127688            |                        | No               |                      |                      |               | No     |             |          |        |



# Mass Spectrum List Report

## Analysis Info

Analysis Name VNPT88\_pos\_000001.d  
Method XMASS\_Method  
Sample Name: VNPT88\_pos  
VNPT88\_pos: in 1:1 THF:MeOH w/ NaCl.

Acquisition Date 12/13/2010 10:10:21 AM  
Operator FTMS\_USER  
Instrument apex-Qe

## Acquisition Parameter

Sample Name: VNPT88  
Exact Mass of (C<sub>27</sub>H<sub>34</sub>N<sub>2</sub>O<sub>4</sub>S)<sub>2</sub>Na<sup>+</sup>: 955.447248u  
Observed Mass: 955.446888u  
Difference: < -1.0 ppm

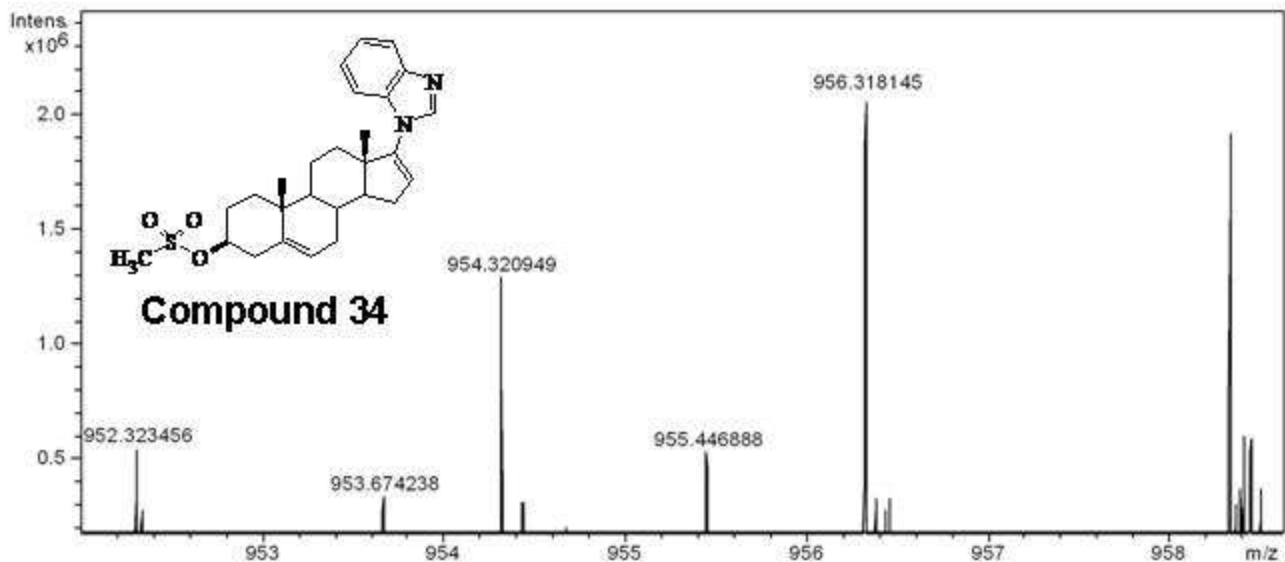

| #  | m/z        | I         |
|----|------------|-----------|
| 1  | 92.810928  | 762789    |
| 2  | 93.447502  | 1444669   |
| 3  | 121.423903 | 1207111   |
| 4  | 123.748557 | 549667    |
| 5  | 136.518139 | 437753    |
| 6  | 167.502441 | 830149    |
| 7  | 185.622592 | 1579337   |
| 8  | 185.623909 | 2056905   |
| 9  | 186.124356 | 625745    |
| 10 | 210.584300 | 1979814   |
| 11 | 233.617105 | 6074250   |
| 12 | 233.621378 | 752650    |
| 13 | 234.118752 | 1538965   |
| 14 | 342.717353 | 603861    |
| 15 | 371.237072 | 1004863   |
| 16 | 371.238050 | 1050175   |
| 17 | 371.238945 | 539967    |
| 18 | 371.240253 | 3637823   |
| 19 | 371.243932 | 11222591  |
| 20 | 371.245617 | 169455167 |
| 21 | 371.248499 | 91926079  |
| 22 | 371.251769 | 3413567   |
| 23 | 372.241528 | 617530    |

**SAMPLE INFORMATION**

Sample Name: VNPT96  
 Sample Type: Unknown  
 Vial: 16  
 Injection #: 1  
 Injection Volume: 5.00 ul  
 Run Time: 20.0 Mnutes  
 Sample Set Name:

Acquired By: System  
 Date Acquired: 4/17/2012 2:57:03 PM  
 Acq. Method Set: VN124  
 Date Processed: 4/17/2012 3:27:47 PM  
 Processing Method: VN124venky  
 Channel Name: WIn Ch1  
 Proc. Chnl. Descr.: FDA 238.5 nm

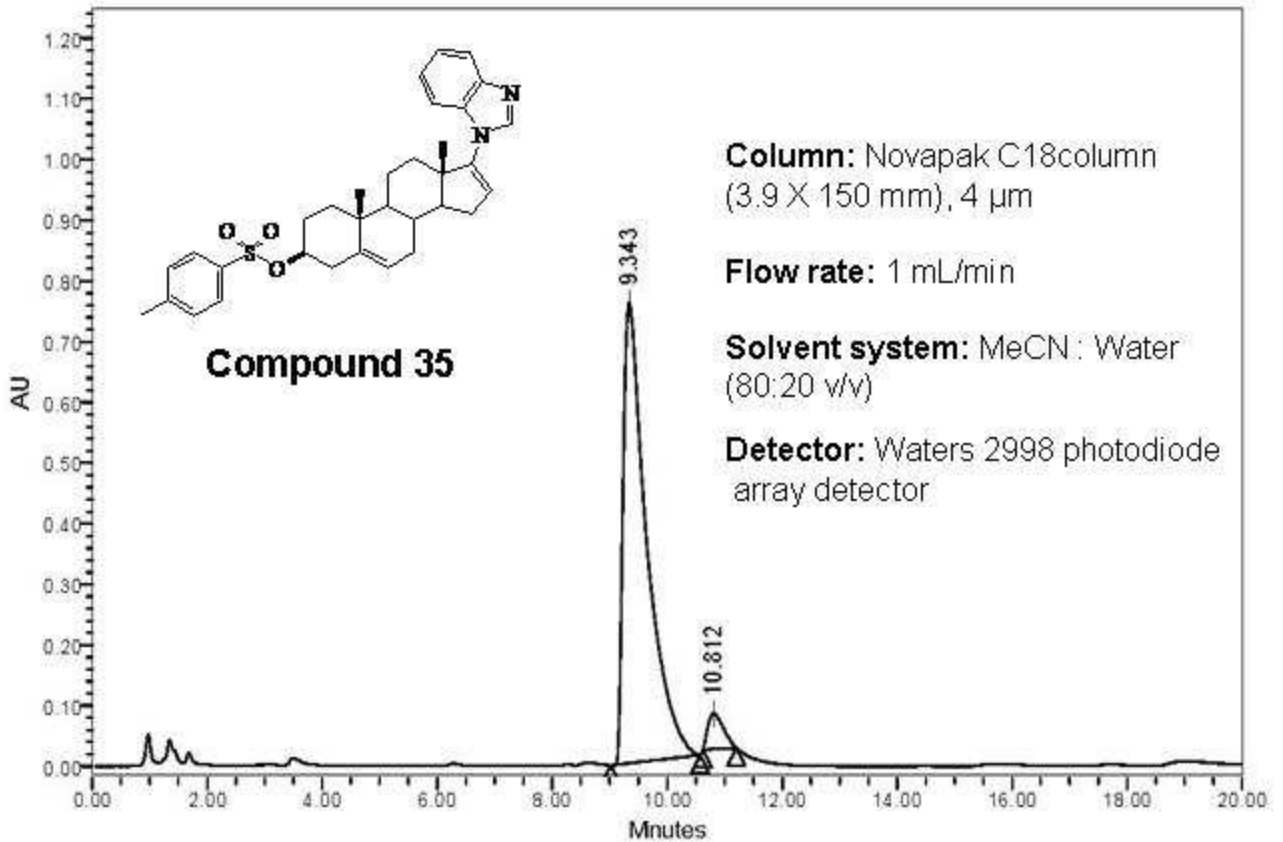

**PDA Result Table**

| Name | RT     | Area     | Purity (#1) Angle | Purity (#1) Threshold | Purity Flag | Match (#1) Spect. Name | Match (#1) Angle | Match (#1) Threshold | PDA Match Flag |
|------|--------|----------|-------------------|-----------------------|-------------|------------------------|------------------|----------------------|----------------|
| 1    | 9.343  | 21631487 |                   |                       | No          |                        |                  |                      | No             |
| 2    | 10.812 | 1105449  |                   |                       | No          |                        |                  |                      | No             |

| Name | Retention Time (min) | Purity1 Angle | Purity1 Threshold | PDA Match1 Spect. Name | PDA Match1 Angle | PDA Match1 Threshold | PDA Match1 Lib. Name | Area (µV*sec) | % Area | Height (µV) | Int Type | Amount |
|------|----------------------|---------------|-------------------|------------------------|------------------|----------------------|----------------------|---------------|--------|-------------|----------|--------|
| 1    | 9.343                |               |                   |                        |                  |                      |                      | 21631487      | 95.14  | 759568      | bb       |        |
| 2    | 10.812               |               |                   |                        |                  |                      |                      | 1105449       | 4.86   | 58691       | bb       |        |

# Mass Spectrum List Report

## Analysis Info

Analysis Name VNPT96\_pos\_000001.d

Method XMASS\_Method

Sample Name: VNPT96\_pos

VNPT96\_pos: in 1:1 THF:MeOH w/ NaCl.

Acquisition Date 12/13/2010 3:00:37 PM

Operator FTMS\_USER

Instrument apex-Qe

## Acquisition Parameter

Sample Name: VNPT96

Exact Mass of (C<sub>33</sub>H<sub>38</sub>N<sub>2</sub>O<sub>3</sub>S)Na<sup>+</sup>: 565.249535u

Observed Mass: 565.250660u

Difference: 2.0 ppm

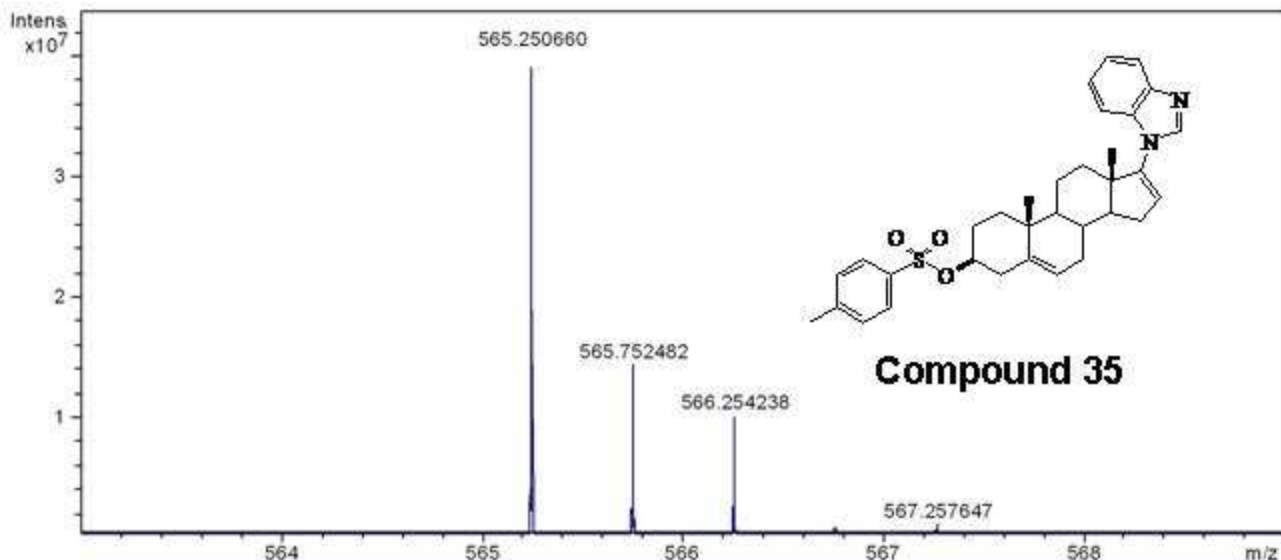

| #  | m/z        | I         |
|----|------------|-----------|
| 1  | 371.245638 | 39013499  |
| 2  | 371.248473 | 92384379  |
| 3  | 372.249059 | 20368505  |
| 4  | 372.250628 | 5581945   |
| 5  | 372.251966 | 21924985  |
| 6  | 373.252490 | 4173943   |
| 7  | 393.228538 | 3966041   |
| 8  | 393.230669 | 11574361  |
| 9  | 403.272364 | 5889112   |
| 10 | 403.275085 | 12258392  |
| 11 | 417.288318 | 3827823   |
| 12 | 417.290650 | 11332719  |
| 13 | 507.330448 | 3972863   |
| 14 | 543.262606 | 27447376  |
| 15 | 543.268069 | 532983888 |
| 16 | 544.267334 | 17625177  |
| 17 | 544.269248 | 16248921  |
| 18 | 544.271785 | 159232089 |
| 19 | 544.275636 | 7544921   |
| 20 | 545.264304 | 15765602  |
| 21 | 545.275212 | 23621730  |
| 22 | 546.267946 | 5662826   |
| 23 | 551.356667 | 4714646   |

**SAMPLE INFORMATION**

|                   |              |                     |                      |
|-------------------|--------------|---------------------|----------------------|
| Sample Name:      | VNPT56EZ     | Acquired By:        | System               |
| Sample Type:      | Unknown      | Date Acquired:      | 4/12/2012 2:11:35 PM |
| Vial:             | 4            | Acq. Method Set:    | VN124                |
| Injection #:      | 1            | Date Processed:     | 4/12/2012 4:51:36 PM |
| Injection Volume: | 20.00 ul     | Processing Method:  | VN124venky           |
| Run Time:         | 30.0 Minutes | Channel Name:       | WIn Ch1              |
| Sample Set Name:  |              | Proc. Chnl. Descr.: | FDA 242.7 nm         |

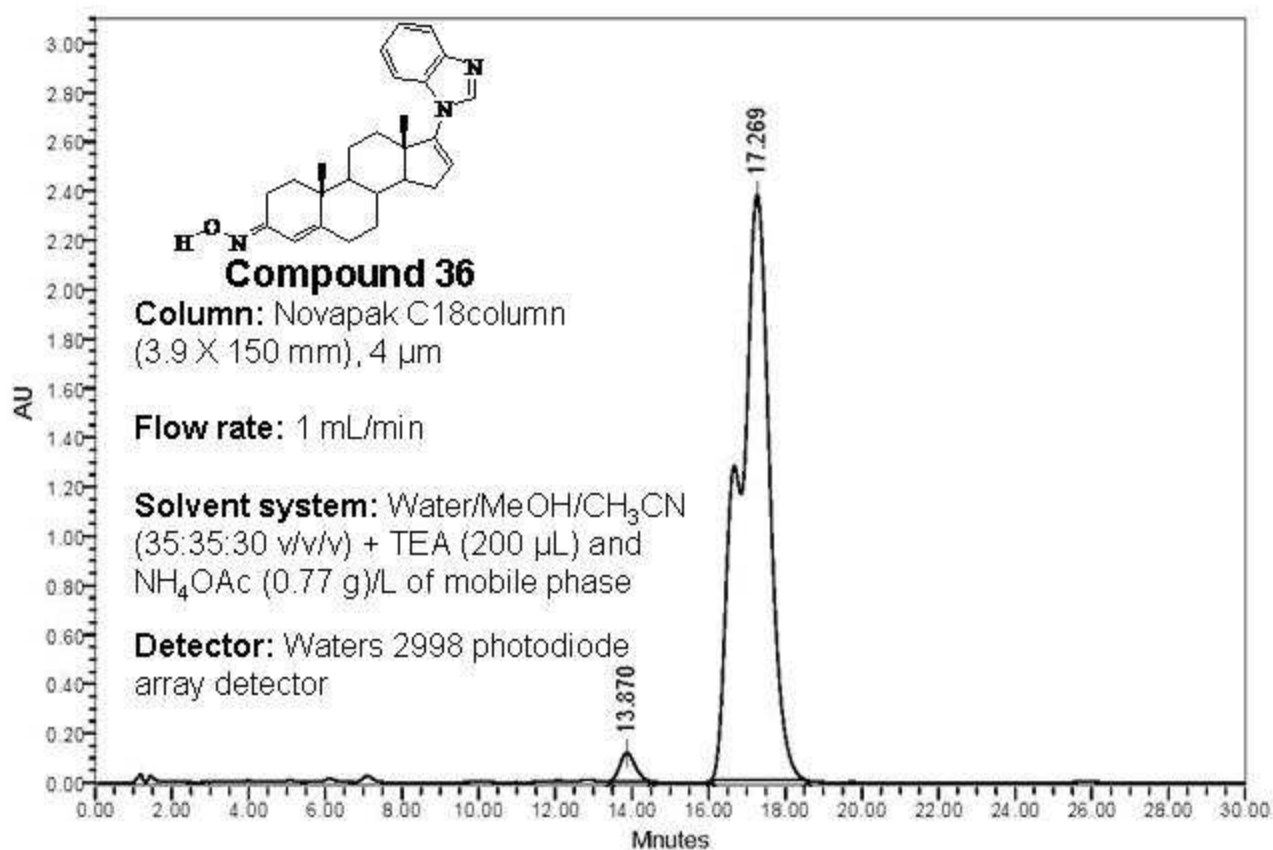

**PDA Result Table**

| Name | RT     | Area      | Purity (#1) Angle | Purity (#1) Threshold | Purity Flag | Match (#1) Spect. Name | Match (#1) Angle | Match (#1) Threshold | PDA Match Flag |
|------|--------|-----------|-------------------|-----------------------|-------------|------------------------|------------------|----------------------|----------------|
| 1    | 13.870 | 3135516   |                   |                       | No          |                        |                  |                      | No             |
| 2    | 17.269 | 131270485 |                   |                       | No          |                        |                  |                      | No             |

| Name | Retention Time (min) | Purity1 Angle | Purity1 Threshold | PDA Match1 Spect. Name | PDA Match1 Angle | PDA Match1 Threshold | PDA Match1 Lib. Name | Area (μV*sec) | % Area | Height (μV) | Int Type | Amount |
|------|----------------------|---------------|-------------------|------------------------|------------------|----------------------|----------------------|---------------|--------|-------------|----------|--------|
| 1    | 13.870               |               |                   |                        |                  |                      |                      | 3274849       | 2.41   | 117424      | bb       |        |
| 2    | 17.269               |               |                   |                        |                  |                      |                      | 132434535     | 97.59  | 2383008     | bb       |        |

# Mass Spectrum List Report

## Analysis Info

Analysis Name VNPT56\_pos\_000001.d

Method XMASS\_Method

Sample Name: VNPT56\_pos  
VNPT56\_pos: in 1:1 THF:MeOH w/ NaCl.

Acquisition Date 12/13/2010 2:26:55 PM

Operator FTMS\_USER

Instrument apex-Qe

## Acquisition Parameter

Sample Name: VNPT56

Exact Mass of (C<sub>26</sub>H<sub>31</sub>N<sub>3</sub>O)<sup>Na+</sup>: 424.235934u

Observed Mass: 424.236369u

Difference: < 1.0 ppm

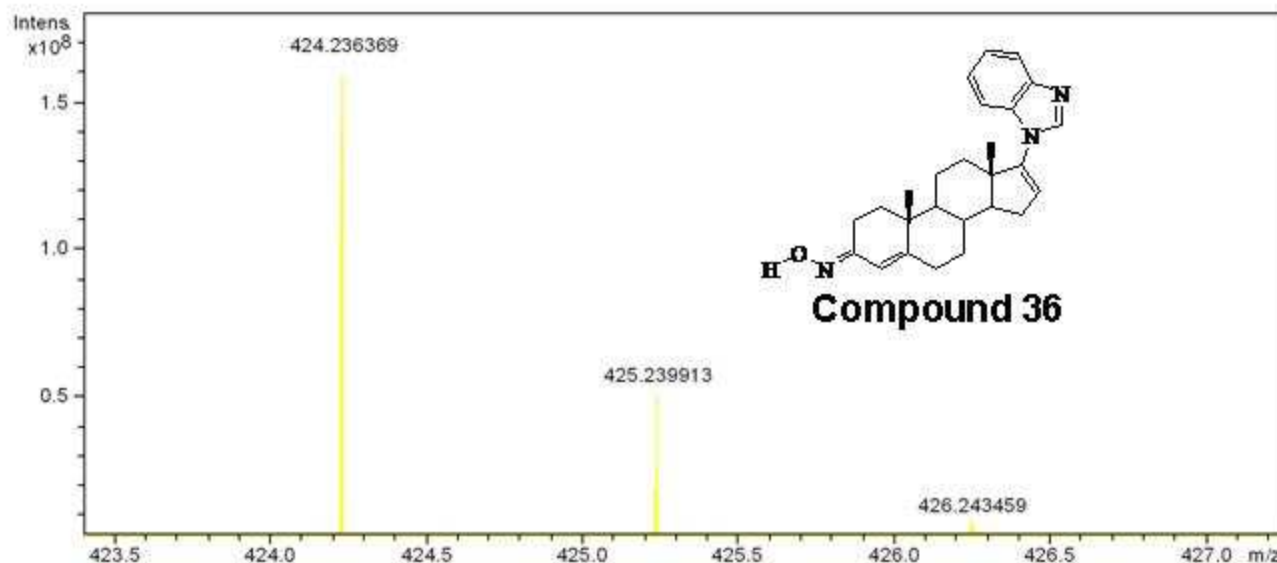

| #  | m/z        | I         |
|----|------------|-----------|
| 1  | 368.128009 | 3737047   |
| 2  | 368.135383 | 6376919   |
| 3  | 368.139193 | 4440535   |
| 4  | 402.252054 | 20780227  |
| 5  | 402.254405 | 99906755  |
| 6  | 403.255310 | 6900927   |
| 7  | 403.257980 | 28226751  |
| 8  | 404.261260 | 4080827   |
| 9  | 424.233761 | 55407799  |
| 10 | 424.236369 | 164099255 |
| 11 | 424.237833 | 19223735  |
| 12 | 424.238837 | 8901815   |
| 13 | 424.239795 | 5143735   |
| 14 | 424.240772 | 3601591   |
| 15 | 425.237028 | 19016890  |
| 16 | 425.239913 | 52950202  |
| 17 | 426.243459 | 8574142   |
| 18 | 437.190333 | 4228346   |
| 19 | 437.194291 | 11052282  |
| 20 | 463.304059 | 6389252   |
| 21 | 482.195620 | 5676821   |
| 22 | 483.276248 | 8722215   |
| 23 | 488.656117 | 3899262   |

Reported by User: System

Project Name: FDA\_Default

**SAMPLE INFORMATION**

Sample Name: VNPT56E  
 Sample Type: Unknown  
 Vial: 6  
 Injection #: 1  
 Injection Volume: 20.00 ul  
 Run Time: 30.0 Minutes  
 Sample Set Name: Puru Sample Set 1

Acquired By: System  
 Date Acquired: 4/12/2012 3:15:39 PM  
 Acq. Method Set: VN124  
 Date Processed: 4/12/2012 5:05:48 PM  
 Processing Method: VN124venky  
 Channel Name: WIn Ch1  
 Proc. Chnl. Descr.: FDA 242.7 nm

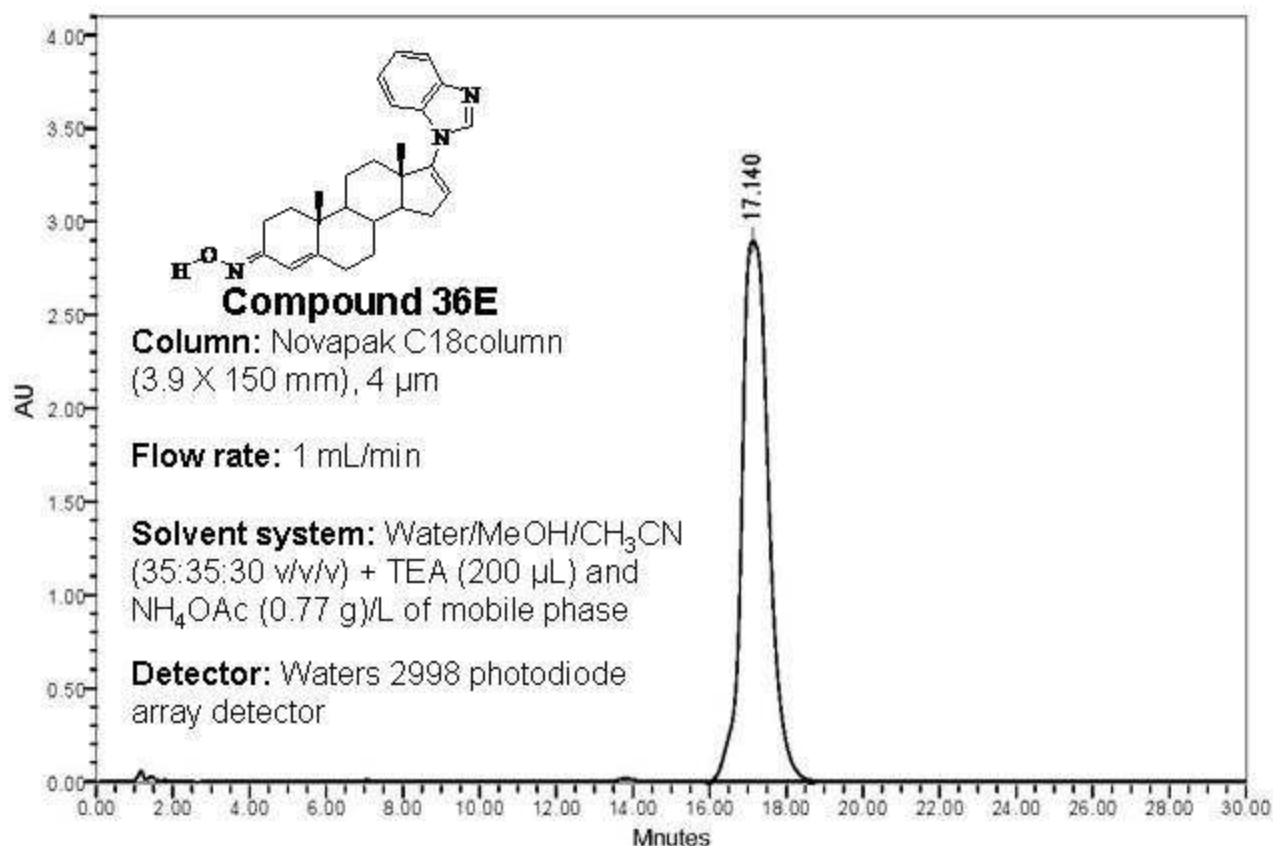

**PDA Result Table**

| Name | RT     | Area      | Purity (#1)<br>Angle | Purity (#1)<br>Threshold | Purity<br>Flag | Match (#1)<br>Spect. Name | Match (#1)<br>Angle | Match (#1)<br>Threshold | PDA Match<br>Flag |
|------|--------|-----------|----------------------|--------------------------|----------------|---------------------------|---------------------|-------------------------|-------------------|
| 1    | 17.140 | 140318033 |                      |                          | No             |                           |                     |                         | No                |

| Name | Retention Time<br>(min) | Purity1<br>Angle | Purity1<br>Threshold | PDA Match1<br>Spect. Name | PDA Match1<br>Angle | PDA Match1<br>Threshold | PDA Match1<br>Lib. Name | Area<br>(µV*sec) | % Area | Height<br>(µV) | Int Type | Amount |
|------|-------------------------|------------------|----------------------|---------------------------|---------------------|-------------------------|-------------------------|------------------|--------|----------------|----------|--------|
| 1    | 17.140                  |                  |                      |                           |                     |                         |                         | 140318033        | 100.00 | 2894291        | bb       |        |

### SAMPLE INFORMATION

Sample Name: VNPT56Z  
 Sample Type: Unknown  
 Vial: 7  
 Injection #: 1  
 Injection Volume: 20.00 ul  
 Run Time: 30.0 Minutes  
 Sample Set Name: Furu Sample Set 1

Acquired By: System  
 Date Acquired: 4/12/2012 3:46:56 PM  
 Acq. Method Set: VNI24  
 Date Processed: 4/16/2012 12:41:23 PM  
 Processing Method: VNI24venky  
 Channel Name: WIn Ch1  
 Proc. Chnl. Descr.: FDA 308.4 nm

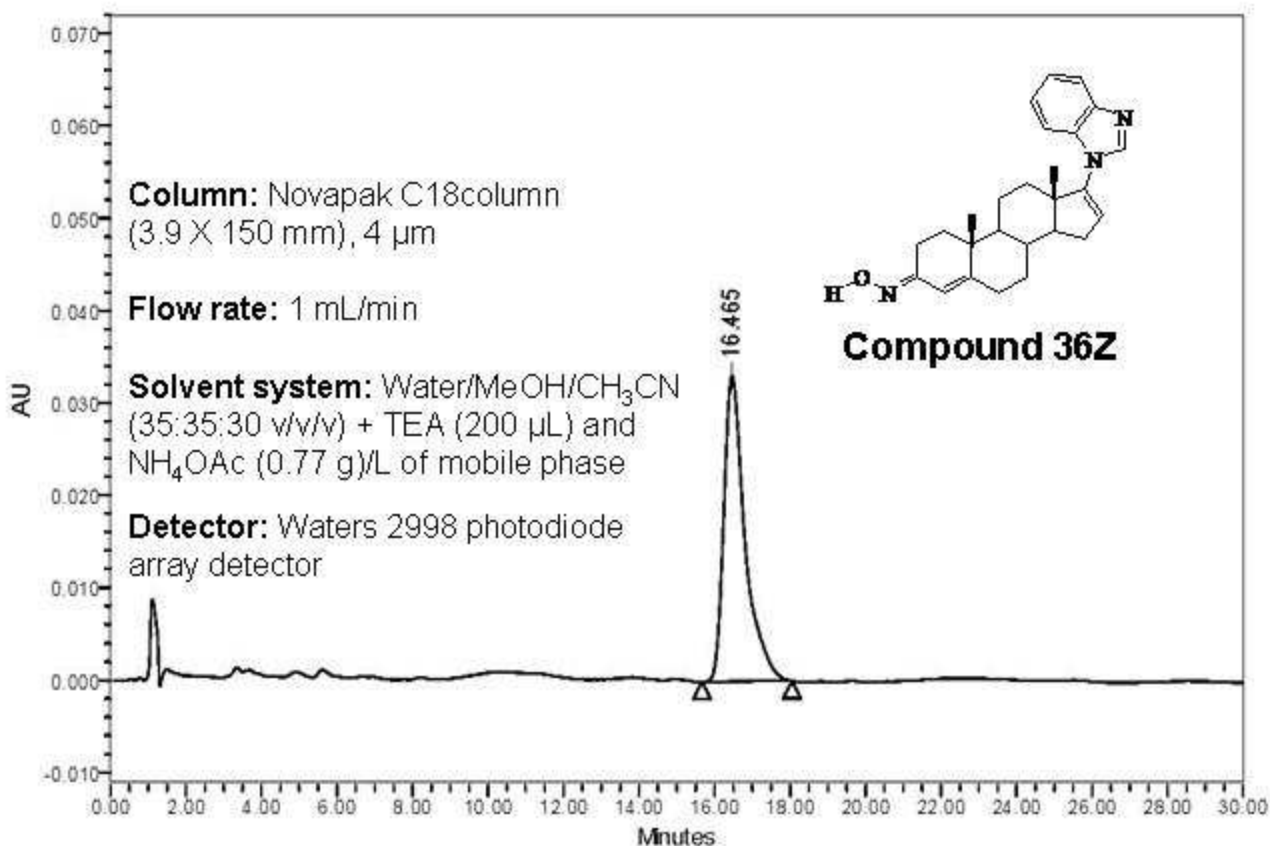

PDA Result Table

| Name | RT     | Area    | Purity (#1) Angle | Purity (#1) Threshold | Purity Flag | Match (#1) Spect. Name | Match (#1) Angle | Match (#1) Threshold | PDA Match Flag |
|------|--------|---------|-------------------|-----------------------|-------------|------------------------|------------------|----------------------|----------------|
| 1    | 16.465 | 1289423 |                   |                       | No          |                        |                  |                      | No             |

| Name | Retention Time (min) | Purity1 Angle | Purity1 Threshold | PDA Match1 Spect. Name | PDA Match1 Angle | PDA Match1 Threshold | PDA Match1 Lib. Name | Area (μV*sec) | % Area | Height (μV) | Int Type | Amount |
|------|----------------------|---------------|-------------------|------------------------|------------------|----------------------|----------------------|---------------|--------|-------------|----------|--------|
| 1    | 16.465               |               |                   |                        |                  |                      |                      | 1289423       | 100.00 | 33076       | bb       |        |

**SAMPLE INFORMATION**

Sample Name: VNPT86EZ  
 Sample Type: Unknown  
 Vial: 33  
 Injection #: 1  
 Injection Volume: 10.00 ul  
 Run Time: 20.0 Mnutes  
 Sample Set Name:

Acquired By: System  
 Date Acquired: 4/17/2012 2:31:15 PM  
 Acq. Method Set: VN124  
 Date Processed: 4/17/2012 2:58:37 PM  
 Processing Method: VN124venky  
 Channel Name: WWin Ch1  
 Proc. Chnl. Descr.: FDA 242.7 nm

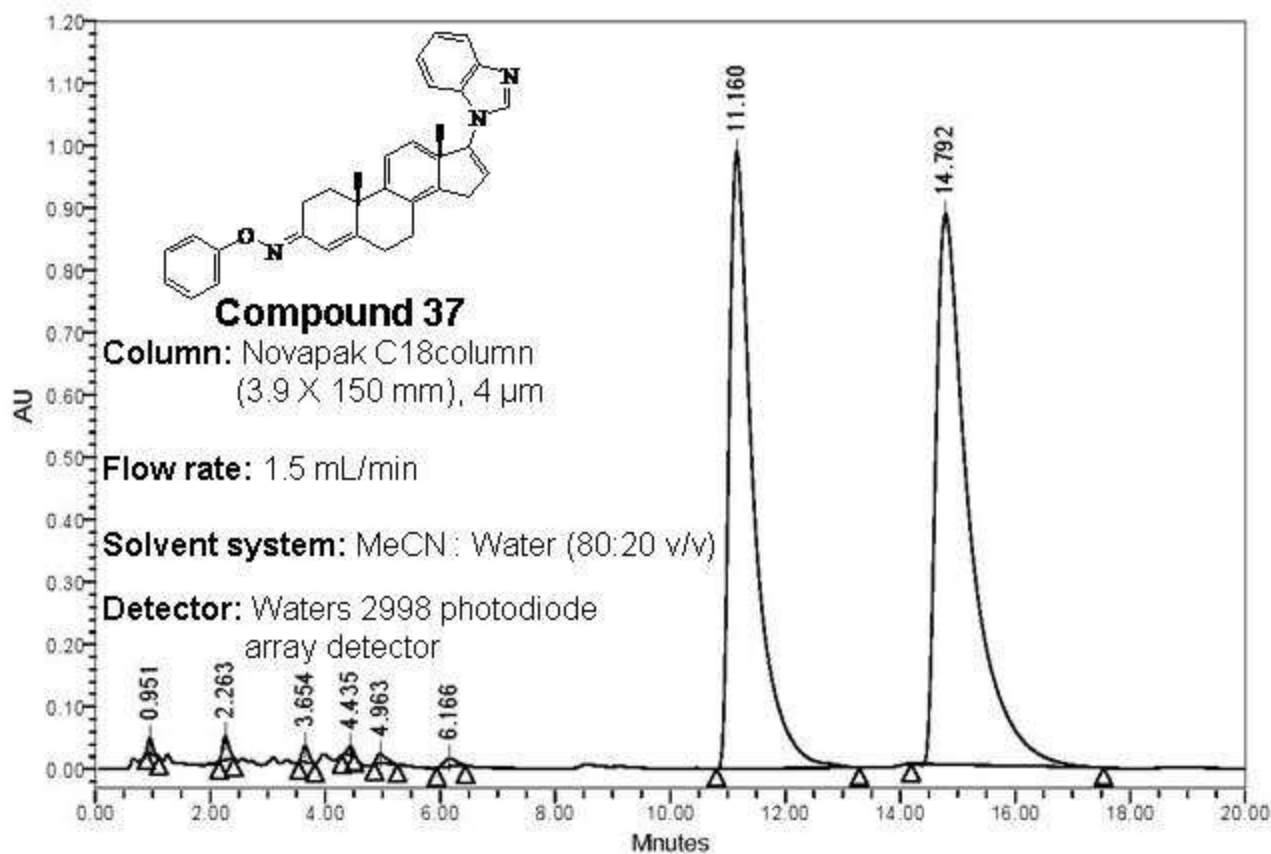

**PDA Result Table**

| Name | Retention Time (min) | Purity1 Angle | Purity1 Threshold | PDA Match1 Spect. Name | PDA Match1 Angle | PDA Match1 Threshold | PDA Match1 Lib. Name | Area (µV*sec) | % Area | Height (µV) | Int Type | Amount |
|------|----------------------|---------------|-------------------|------------------------|------------------|----------------------|----------------------|---------------|--------|-------------|----------|--------|
| 1    | 0.951                |               |                   |                        |                  |                      |                      | 147967        | 0.22   | 24144       | bb       |        |
| 2    | 2.263                |               |                   |                        |                  |                      |                      | 279566        | 0.42   | 38471       | bb       |        |
| 3    | 3.654                |               |                   |                        |                  |                      |                      | 210600        | 0.32   | 26908       | bb       |        |
| 4    | 4.435                |               |                   |                        |                  |                      |                      | 77454         | 0.12   | 11811       | bb       |        |
| 5    | 4.963                |               |                   |                        |                  |                      |                      | 170556        | 0.26   | 14388       | bb       |        |
| 6    | 6.166                |               |                   |                        |                  |                      |                      | 199059        | 0.30   | 13315       | bb       |        |
| 7    | 11.160               |               |                   |                        |                  |                      |                      | 29047288      | 44.15  | 990268      | bb       |        |
| 8    | 14.792               |               |                   |                        |                  |                      |                      | 35665664      | 54.20  | 882686      | bb       |        |



# Mass Spectrum List Report

## Analysis Info

Analysis Name VNPT86\_pos\_000002.d  
Method XMASS\_Method  
Sample Name: VNPT86\_pos  
VNPT86\_pos: in 1:1 THF:MeOH w/ NaCl.

Acquisition Date 12/13/2010 2:43:43 PM  
Operator FTMS\_USER  
Instrument apex-Qe

## Acquisition Parameter

Sample Name: VNPT86  
Exact Mass of (C<sub>32</sub>H<sub>35</sub>N<sub>3</sub>O)Na<sup>+</sup>: 500.267234u  
Observed Mass: 500.267706u  
Difference: < 1.0 ppm

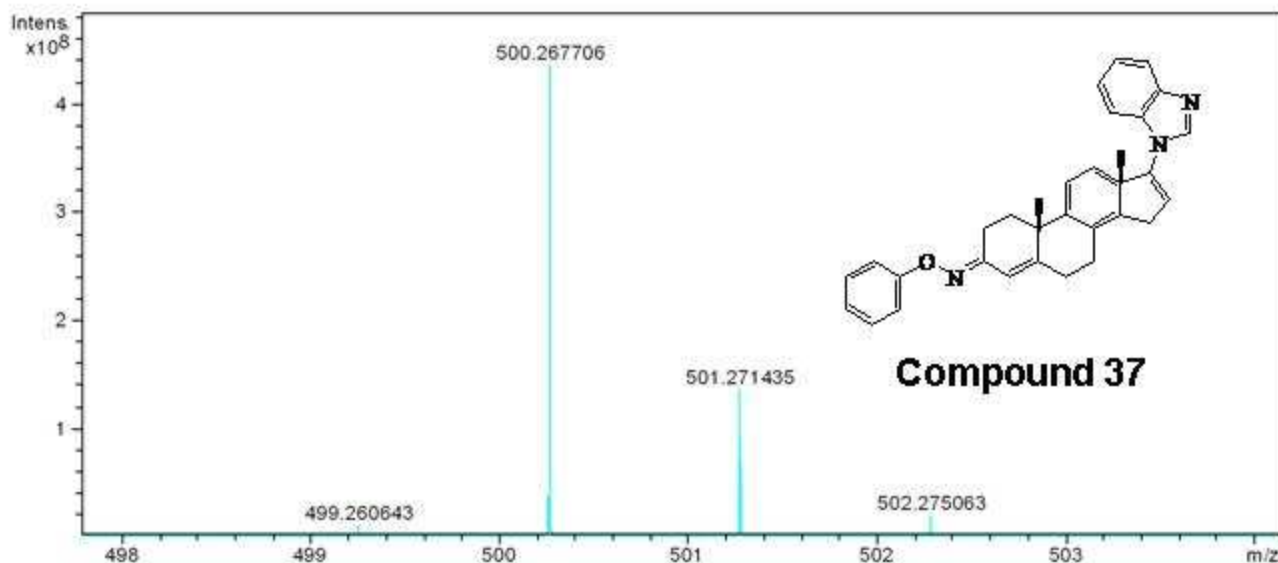

| #  | m/z        | I         |
|----|------------|-----------|
| 1  | 250.132714 | 6161166   |
| 2  | 437.194380 | 8789105   |
| 3  | 463.304092 | 5616992   |
| 4  | 478.281369 | 4172295   |
| 5  | 478.283427 | 10476039  |
| 6  | 478.286387 | 40480264  |
| 7  | 479.289697 | 13168147  |
| 8  | 499.260643 | 10297096  |
| 9  | 500.257456 | 5318420   |
| 10 | 500.261569 | 38760212  |
| 11 | 500.265386 | 46083860  |
| 12 | 500.267706 | 433630996 |
| 13 | 500.271389 | 16985876  |
| 14 | 500.272725 | 10055444  |
| 15 | 500.274065 | 6876948   |
| 16 | 500.275372 | 4841236   |
| 17 | 501.265880 | 18083617  |
| 18 | 501.269136 | 26095393  |
| 19 | 501.271435 | 134197025 |
| 20 | 501.275116 | 6324001   |
| 21 | 502.269589 | 4384557   |
| 22 | 502.272551 | 5713709   |
| 23 | 502.275063 | 19107629  |

**SAMPLE INFORMATION**

Sample Name: VNPT90EZ  
 Sample Type: Unknown  
 Vial: 13  
 Injection #: 2  
 Injection Volume: 5.00 ul  
 Run Time: 20.0 Mnutes  
 Sample Set Name:

Acquired By: System  
 Date Acquired: 4/16/2012 6:40:40 PM  
 Acq. Method Set: VN124  
 Date Processed: 4/16/2012 7:02:11 PM  
 Processing Method: VN124venky  
 Channel Name: WIn Ch1  
 Proc. Chnl. Descr.: FDA 242.7 nm

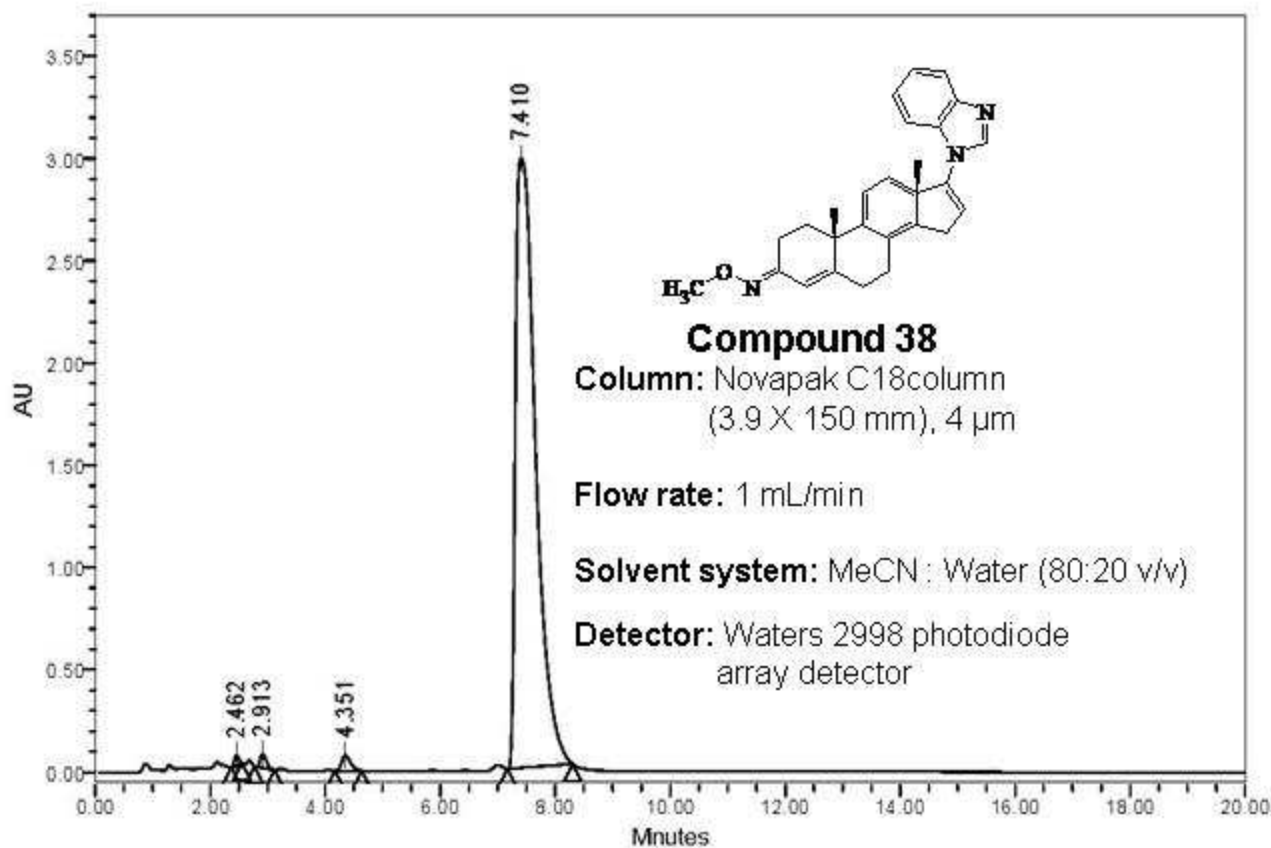

**PDA Result Table**

| Name | Retention Time (min) | Purity1 Angle | Purity1 Threshold | PDA Match1 Spect. Name | PDA Match1 Angle | PDA Match1 Threshold | PDA Match1 Lib. Name | Area (µV*sec) | % Area | Height (µV) | Int Type | Amount |
|------|----------------------|---------------|-------------------|------------------------|------------------|----------------------|----------------------|---------------|--------|-------------|----------|--------|
| 1    | 2.462                |               |                   |                        |                  |                      |                      | 276523        | 0.37   | 49900       | bb       |        |
| 2    | 2.913                |               |                   |                        |                  |                      |                      | 510130        | 0.69   | 66982       | bb       |        |
| 3    | 4.351                |               |                   |                        |                  |                      |                      | 821480        | 1.11   | 77988       | bb       |        |
| 4    | 7.410                |               |                   |                        |                  |                      |                      | 72353889      | 97.83  | 2982634     | bb       |        |
| 4    | 7.410                | 72353889      |                   |                        | No               |                      |                      |               | No     |             |          |        |

## Mass Spectrum List Report

### Analysis Info

Analysis Name VNPT90\_pos\_000001.d

Method XMASS\_Method

Sample Name: VNPT90\_pos  
VNPT90\_pos: in 1:1 THF:MeOH w/ NaCl.

Acquisition Date 12/13/2010 2:48:12 PM

Operator FTMS\_USER

Instrument apex-Qe

### Acquisition Parameter

Sample Name: VNPT90

Exact Mass of (C<sub>27</sub>H<sub>33</sub>N<sub>3</sub>O)Na<sup>+</sup>: 438.251584u

Observed Mass: 438.252060u

Difference: 1.1 ppm

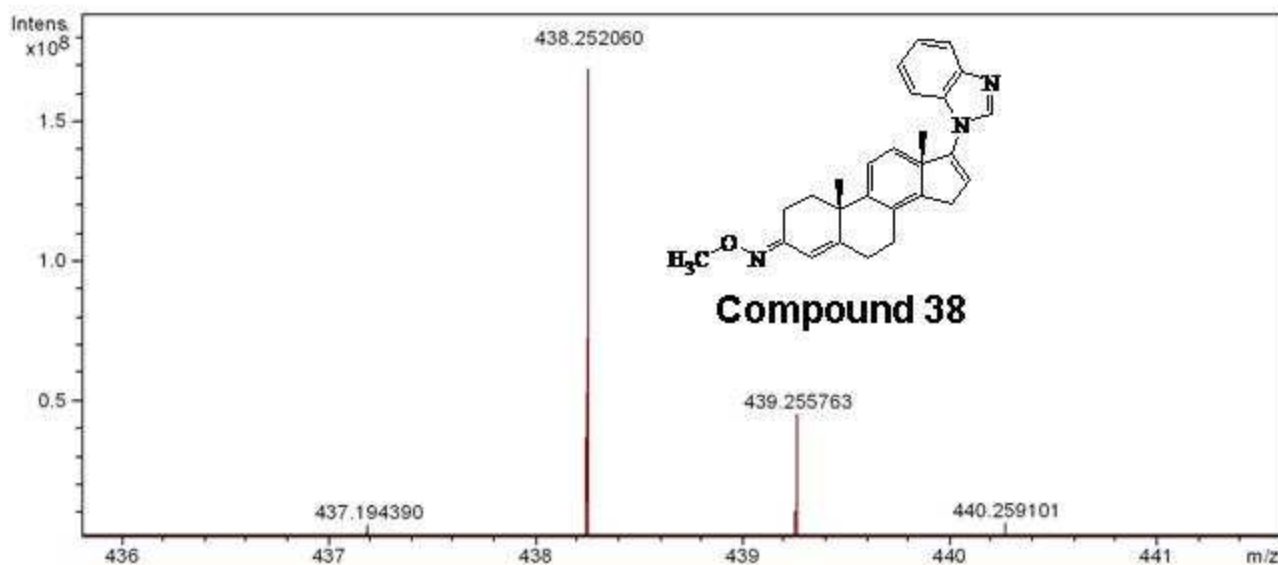

| #  | m/z        | I         |
|----|------------|-----------|
| 1  | 219.124631 | 2574927   |
| 2  | 413.266960 | 8050259   |
| 3  | 416.267615 | 17567324  |
| 4  | 416.270108 | 71315036  |
| 5  | 417.270928 | 7669343   |
| 6  | 417.273591 | 24768095  |
| 7  | 418.276985 | 4046435   |
| 8  | 437.194390 | 5367501   |
| 9  | 438.248374 | 20856533  |
| 10 | 438.250131 | 38055637  |
| 11 | 438.252060 | 174108373 |
| 12 | 438.256591 | 3182293   |
| 13 | 439.251788 | 7808733   |
| 14 | 439.253076 | 10653405  |
| 15 | 439.255763 | 45002461  |
| 16 | 440.259101 | 5836517   |
| 17 | 443.292697 | 5840638   |
| 18 | 461.291776 | 2971562   |
| 19 | 463.247635 | 3695551   |
| 20 | 463.303667 | 2658240   |
| 21 | 463.305263 | 2664896   |
| 22 | 463.307719 | 16158656  |
| 23 | 464.310818 | 5484491   |

**SAMPLE INFORMATION**

Sample Name: VNPT91EZ  
 Sample Type: Unknown  
 Vial: 14  
 Injection #: 1  
 Injection Volume: 10.00 ul  
 Run Time: 20.0 Mnutes  
 Sample Set Name:

Acquired By: System  
 Date Acquired: 4/18/2012 12:06:02 PM  
 Acq. Method Set: VN124  
 Date Processed: 4/18/2012 12:36:11 PM  
 Processing Method: VN124venky  
 Channel Name: WIn Ch1  
 Proc. Chnl. Descr.: FDA 242.7 nm

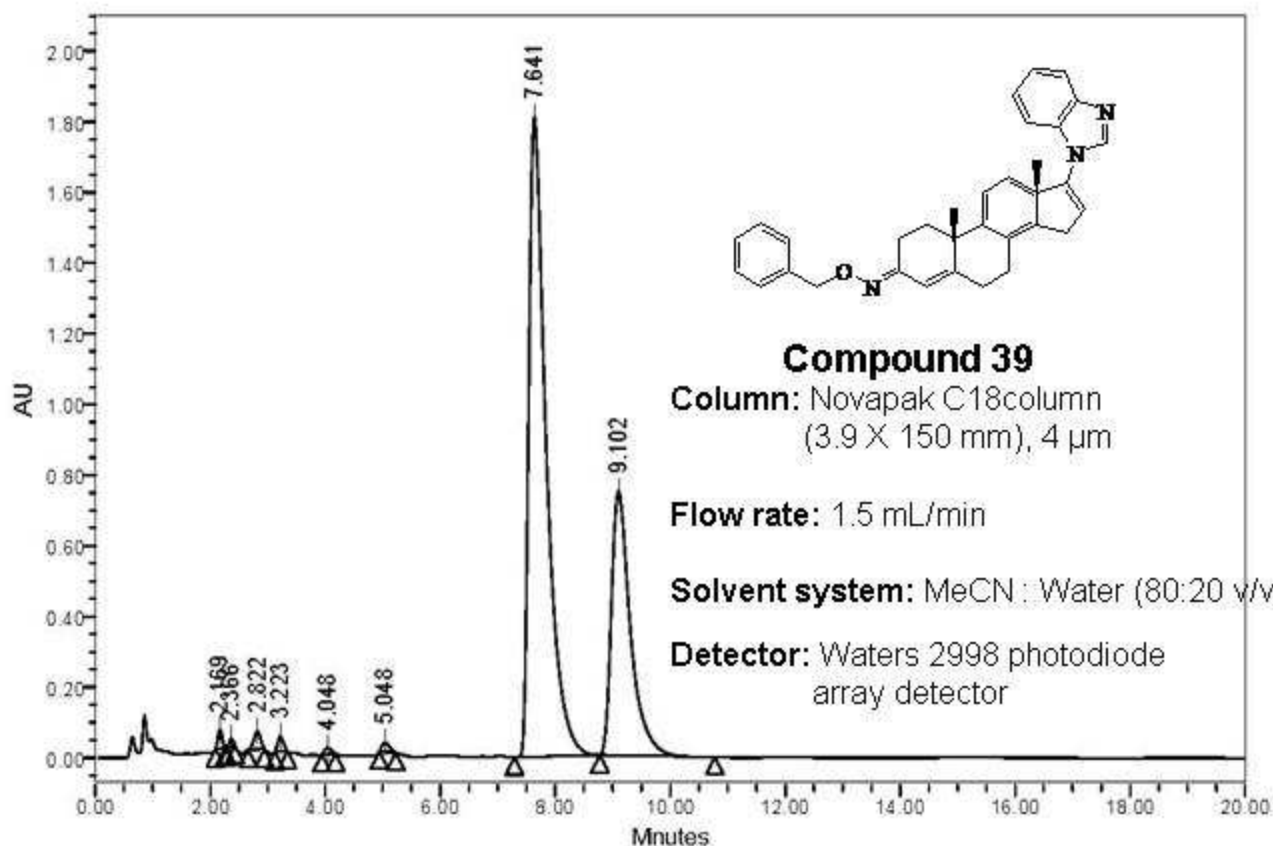

**PDA Result Table**

| Name | Retention Time (min) | Purity1 Angle | Purity1 Threshold | PDA Match1 Spect. Name | PDA Match1 Angle | PDA Match1 Threshold | PDA Match1 Lib. Name | Area (μV*sec) | % Area | Height (μV) | Int Type | Amount |
|------|----------------------|---------------|-------------------|------------------------|------------------|----------------------|----------------------|---------------|--------|-------------|----------|--------|
| 1    | 2.169                |               |                   |                        |                  |                      |                      | 281170        | 0.50   | 52418       | bb       |        |
| 2    | 2.366                |               |                   |                        |                  |                      |                      | 108346        | 0.19   | 23308       | bb       |        |
| 3    | 2.822                |               |                   |                        |                  |                      |                      | 405503        | 0.72   | 51482       | bb       |        |
| 4    | 3.223                |               |                   |                        |                  |                      |                      | 294087        | 0.52   | 42465       | bb       |        |
| 5    | 4.048                |               |                   |                        |                  |                      |                      | 131555        | 0.23   | 17038       | bb       |        |
| 6    | 5.048                |               |                   |                        |                  |                      |                      | 242246        | 0.43   | 26854       | bb       |        |
| 7    | 7.641                |               |                   |                        |                  |                      |                      | 37898416      | 67.06  | 1810460     | bb       |        |
| 8    | 9.102                |               |                   |                        |                  |                      |                      | 17155637      | 30.35  | 748129      | bb       |        |

# Mass Spectrum List Report

## Analysis Info

Analysis Name VNPT91\_pos\_000001.d

Method XMASS\_Method

Sample Name: VNPT91\_pos

VNPT91\_pos: in 1:1 THF:MeOH w/ NaCl.

Acquisition Date 12/13/2010 2:51:51 PM

Operator FTMS\_USER

Instrument apex-Qe

## Acquisition Parameter

Sample Name: VNPT91

Exact Mass of (C<sub>33</sub>H<sub>37</sub>N<sub>3</sub>O)<sup>Na+</sup>: 514.282884u

Observed Mass: 514.283403u

Difference: 1.0 ppm

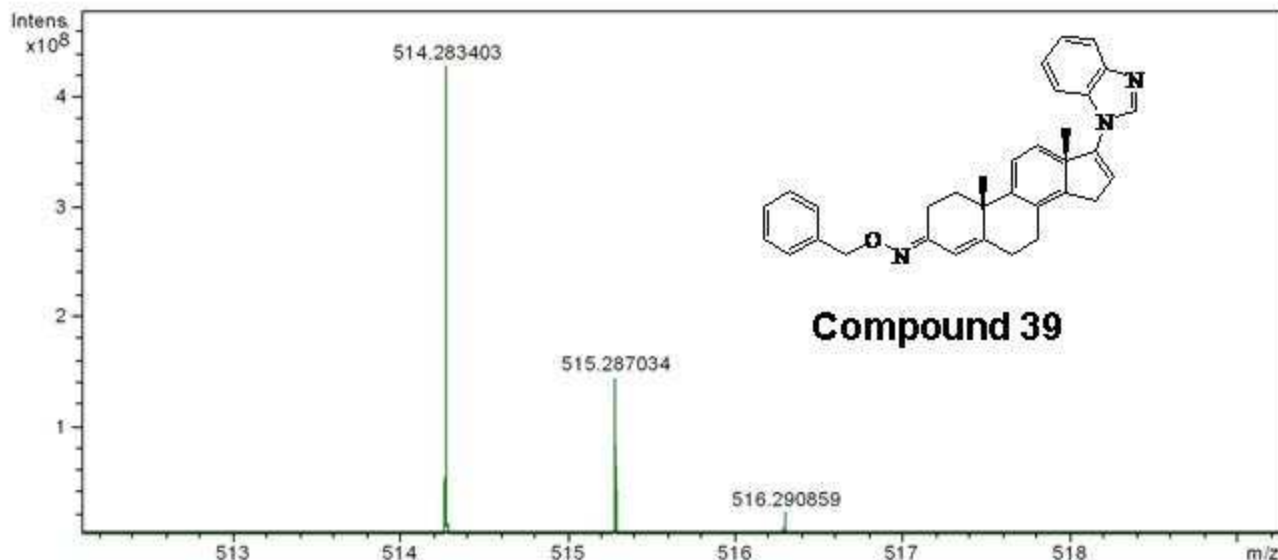

| #  | m/z        | I         |
|----|------------|-----------|
| 1  | 257.140458 | 7961506   |
| 2  | 413.267041 | 9796655   |
| 3  | 437.194474 | 6372640   |
| 4  | 492.296638 | 45985994  |
| 5  | 492.301584 | 187543755 |
| 6  | 493.300248 | 25276638  |
| 7  | 493.303108 | 9834718   |
| 8  | 493.305230 | 59355358  |
| 9  | 494.303758 | 6232305   |
| 10 | 494.308746 | 9810162   |
| 11 | 507.330529 | 6953455   |
| 12 | 514.278070 | 64991861  |
| 13 | 514.283403 | 427602549 |
| 14 | 514.287283 | 18092661  |
| 15 | 514.288720 | 11080309  |
| 16 | 514.290105 | 7660149   |
| 17 | 515.281541 | 34255496  |
| 18 | 515.282982 | 27841160  |
| 19 | 515.287034 | 144355976 |
| 20 | 516.285144 | 6963867   |
| 21 | 516.290859 | 21934747  |
| 22 | 528.263300 | 6980474   |
| 23 | 530.272963 | 7154590   |

### SAMPLE INFORMATION

Sample Name: VNPT135  
 Sample Type: Unknown  
 Vial: 21  
 Injection #: 2  
 Injection Volume: 10.00 ul  
 Run Time: 20.0 Mnutes  
 Sample Set Name:

Acquired By: System  
 Date Acquired: 4/18/2012 12:51:36 PM  
 Acq. Method Set: VN124  
 Date Processed: 4/18/2012 1:26:05 PM  
 Processing Method: VN124venky  
 Channel Name: WIn Ch1  
 Proc. Chnl. Descr.: FDA 261.6 nm

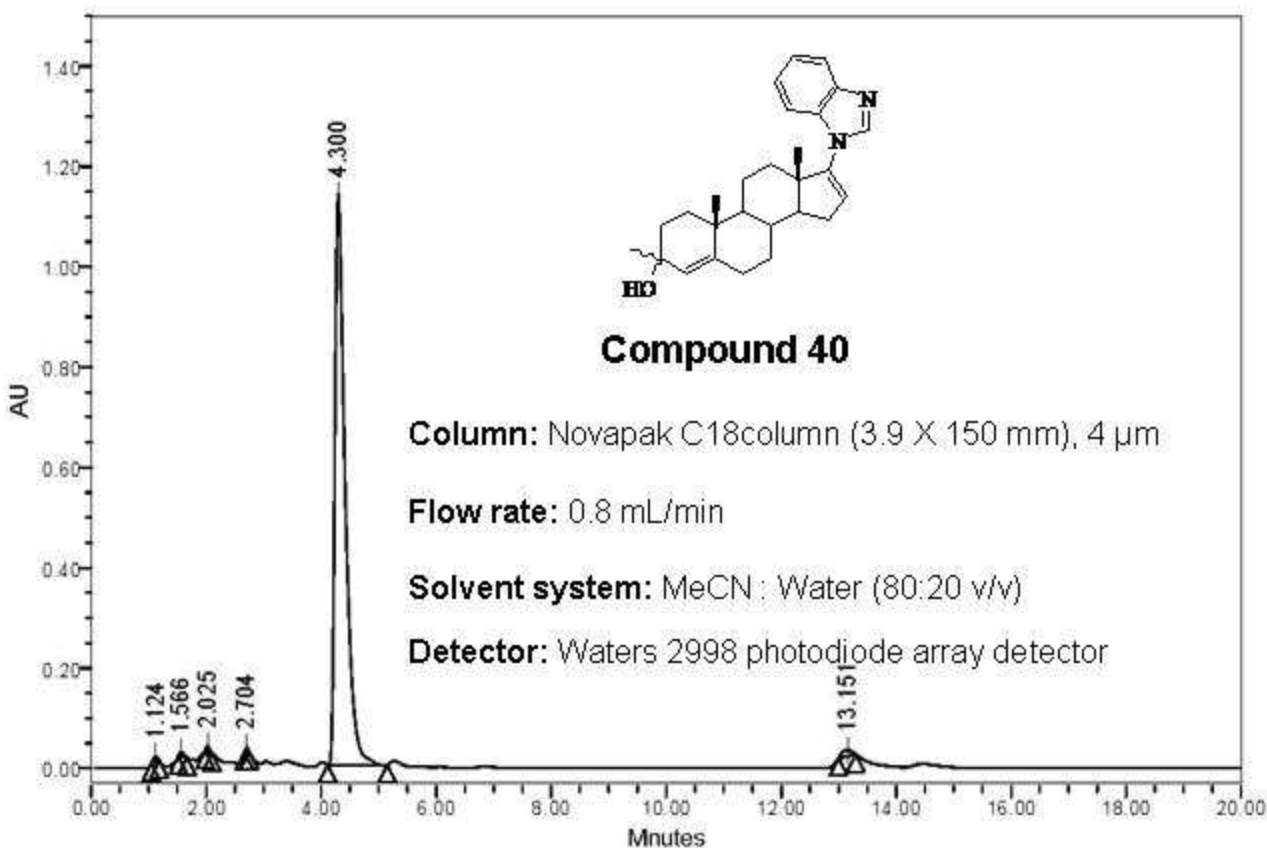

PDA Result Table

| Name | Retention Time (min) | Purity1 Angle | Purity1 Threshold | PDA Match1 Spect. Name | PDA Match1 Angle | PDA Match1 Threshold | PDA Match1 Lib. Name | Area (μV*sec) | % Area | Height (μV) | Int Type | Amount |
|------|----------------------|---------------|-------------------|------------------------|------------------|----------------------|----------------------|---------------|--------|-------------|----------|--------|
| 1    | 1.124                |               |                   |                        |                  |                      |                      | 51733         | 0.36   | 10202       | bb       |        |
| 2    | 1.566                |               |                   |                        |                  |                      |                      | 47653         | 0.33   | 9677        | bb       |        |
| 3    | 2.025                |               |                   |                        |                  |                      |                      | 43769         | 0.30   | 11467       | bb       |        |
| 4    | 2.704                |               |                   |                        |                  |                      |                      | 28431         | 0.20   | 9262        | bb       |        |
| 5    | 4.300                |               |                   |                        |                  |                      |                      | 14097027      | 97.79  | 1139189     | bb       |        |
| 6    | 13.151               |               |                   |                        |                  |                      |                      | 146781        | 1.02   | 12631       | bb       |        |
| 6    | 13.151               | 146781        |                   |                        | No               |                      |                      |               | No     |             |          |        |

## Mass Spectrum List Report

### Analysis Info

Analysis Name VNPT135\_pos\_000001.d

Method XMASS\_Method

Sample Name: VNPT135\_pos

VNPT135\_pos: in 1:1 THF:MeOH w/ NaCl.

Acquisition Date 12/13/2010 3:15:24 PM

Operator FTMS\_USER

Instrument apex-Qe

### Acquisition Parameter

Sample Name: VNPT135

Exact Mass of (C<sub>27</sub>H<sub>34</sub>N<sub>2</sub>O)Na<sup>+</sup>: 425.256335u

Observed Mass: 425.257060u

Difference: 1.7 ppm

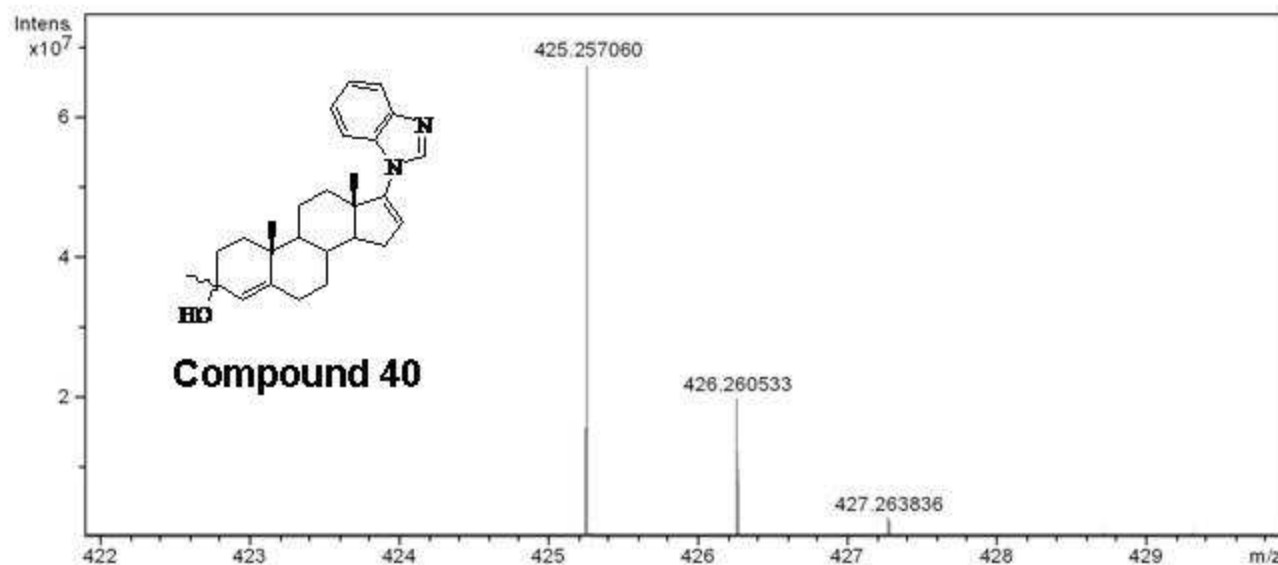

| #  | m/z        | I         |
|----|------------|-----------|
| 1  | 403.271288 | 36826730  |
| 2  | 403.273131 | 33826410  |
| 3  | 403.274930 | 122072682 |
| 4  | 403.277216 | 6772330   |
| 5  | 403.278083 | 4212330   |
| 6  | 404.274853 | 23309931  |
| 7  | 404.276519 | 11656811  |
| 8  | 404.278251 | 49163883  |
| 9  | 405.278221 | 4771436   |
| 10 | 405.281837 | 6237804   |
| 11 | 425.253455 | 16060075  |
| 12 | 425.254614 | 14722731  |
| 13 | 425.257060 | 67481259  |
| 14 | 426.257035 | 6530736   |
| 15 | 426.260533 | 19984048  |
| 16 | 426.266079 | 8052400   |
| 17 | 437.194395 | 9666291   |
| 18 | 441.249109 | 6147856   |
| 19 | 441.251922 | 30699281  |
| 20 | 442.255364 | 9125656   |
| 21 | 443.288145 | 8040224   |
| 22 | 443.289864 | 9060128   |
| 23 | 443.292625 | 44625696  |

Reported by User: System

Project Name: FDA\_Default

**SAMPLE INFORMATION**

Sample Name: VNPT179  
 Sample Type: Unknown  
 Vial: 26  
 Injection #: 1  
 Injection Volume: 20.00 ul  
 Run Time: 30.0 Minutes  
 Sample Set Name:

Acquired By: System  
 Date Acquired: 4/16/2012 3:50:31 PM  
 Acq. Method Set: VN124  
 Date Processed: 4/16/2012 5:15:43 PM  
 Processing Method: VN124venky  
 Channel Name: WIn Ch1  
 Proc. Chnl. Descr.: FDA 242.7 nm

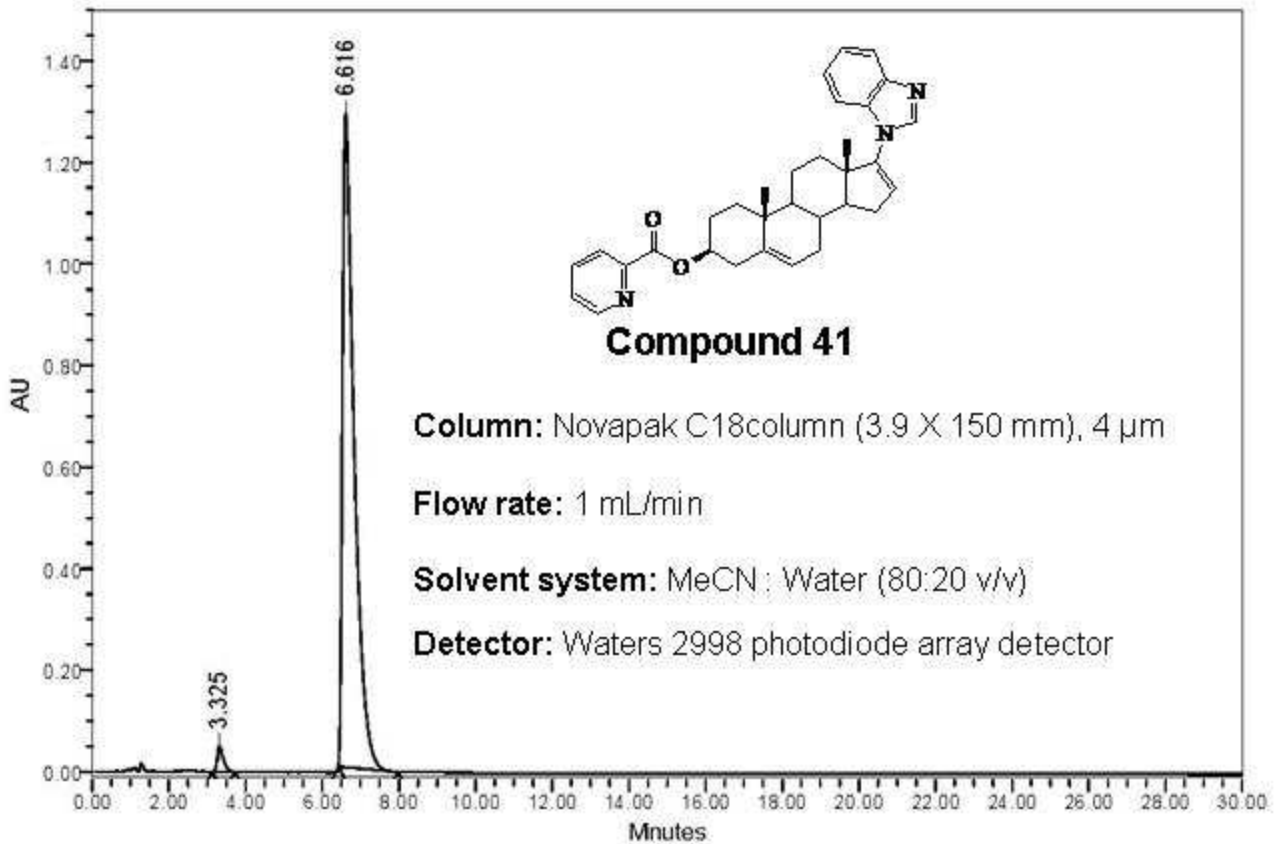

**PDA Result Table**

| Name | RT    | Area     | Purity (#1)<br>Angle | Purity (#1)<br>Threshold | Purity<br>Flag | Match (#1)<br>Spect. Name | Match (#1)<br>Angle | Match (#1)<br>Threshold | PDA Match<br>Flag |
|------|-------|----------|----------------------|--------------------------|----------------|---------------------------|---------------------|-------------------------|-------------------|
| 1    | 3.325 | 551467   |                      |                          | No             |                           |                     |                         | No                |
| 2    | 6.616 | 27187061 |                      |                          | No             |                           |                     |                         | No                |

| Name | Retention Time<br>(min) | Purity1<br>Angle | Purity1<br>Threshold | PDA Match1<br>Spect. Name | PDA Match1<br>Angle | PDA Match1<br>Threshold | PDA Match1<br>Lib. Name | Area<br>(µV*sec) | % Area | Height<br>(µV) | Int Type | Amount |
|------|-------------------------|------------------|----------------------|---------------------------|---------------------|-------------------------|-------------------------|------------------|--------|----------------|----------|--------|
| 1    | 3.325                   |                  |                      |                           |                     |                         |                         | 551467           | 1.99   | 49837          | bb       |        |
| 2    | 6.616                   |                  |                      |                           |                     |                         |                         | 27187061         | 98.01  | 1290219        | bb       |        |



# Mass Spectrum List Report

## Analysis Info

Analysis Name VNPT179\_pos\_000001.d  
Method XMASS\_Method  
Sample Name: VNPT179\_pos  
VNPT179\_pos: in 1:1 THF:MeOH w/ NaCl.

Acquisition Date 3/20/2012 11:47:08 AM  
Operator FTMS\_USER  
Instrument apex-Qe

## Acquisition Parameter

Sample: VNPT179

Exact Mass of (C<sub>32</sub>H<sub>35</sub>N<sub>3</sub>O<sub>2</sub>)Na<sup>+</sup> = 516.262148u

Observed Mass = 516.261474u

Difference = -1.3 ppm

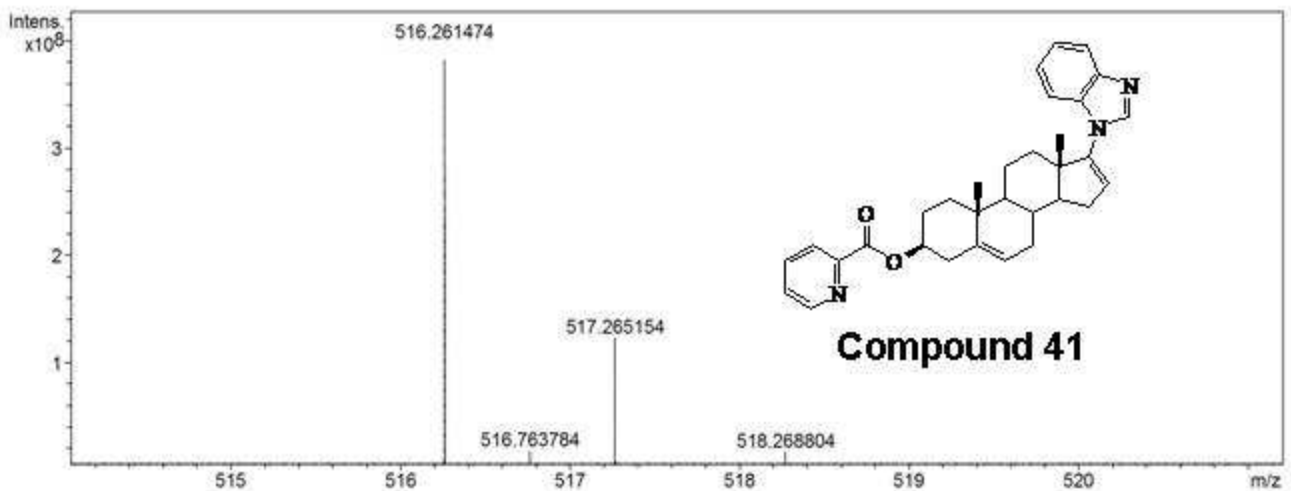

| m/z        | I         |
|------------|-----------|
| 197.934590 | 1822853   |
| 198.377329 | 5411965   |
| 215.088630 | 1580010   |
| 215.088993 | 34418026  |
| 215.089216 | 2782186   |
| 288.289811 | 2729377   |
| 413.265369 | 3316464   |
| 413.266167 | 25123568  |
| 414.269713 | 3206388   |
| 494.278329 | 3346440   |
| 494.279957 | 67017736  |
| 495.283499 | 20823052  |
| 516.245880 | 3133532   |
| 516.258064 | 8555612   |
| 516.258869 | 6937692   |
| 516.261474 | 396909660 |
| 516.763784 | 17362014  |
| 517.259856 | 2213472   |
| 517.261533 | 2603104   |
| 517.262460 | 2534496   |
| 517.263060 | 2675808   |

**SAMPLE INFORMATION**

Sample Name: VNPT177B  
 Sample Type: Unknown  
 Vial: 34  
 Injection #: 1  
 Injection Volume: 20.00 ul  
 Run Time: 30.0 Minutes  
 Sample Set Name:

Acquired By: System  
 Date Acquired: 4/16/2012 3:19:08 PM  
 Acq. Method Set: VNI24  
 Date Processed: 4/16/2012 3:50:49 PM  
 Processing Method: VNI24venky  
 Channel Name: WIn Ch1  
 Proc. Chnl. Descr.: FDA 260.5 nm

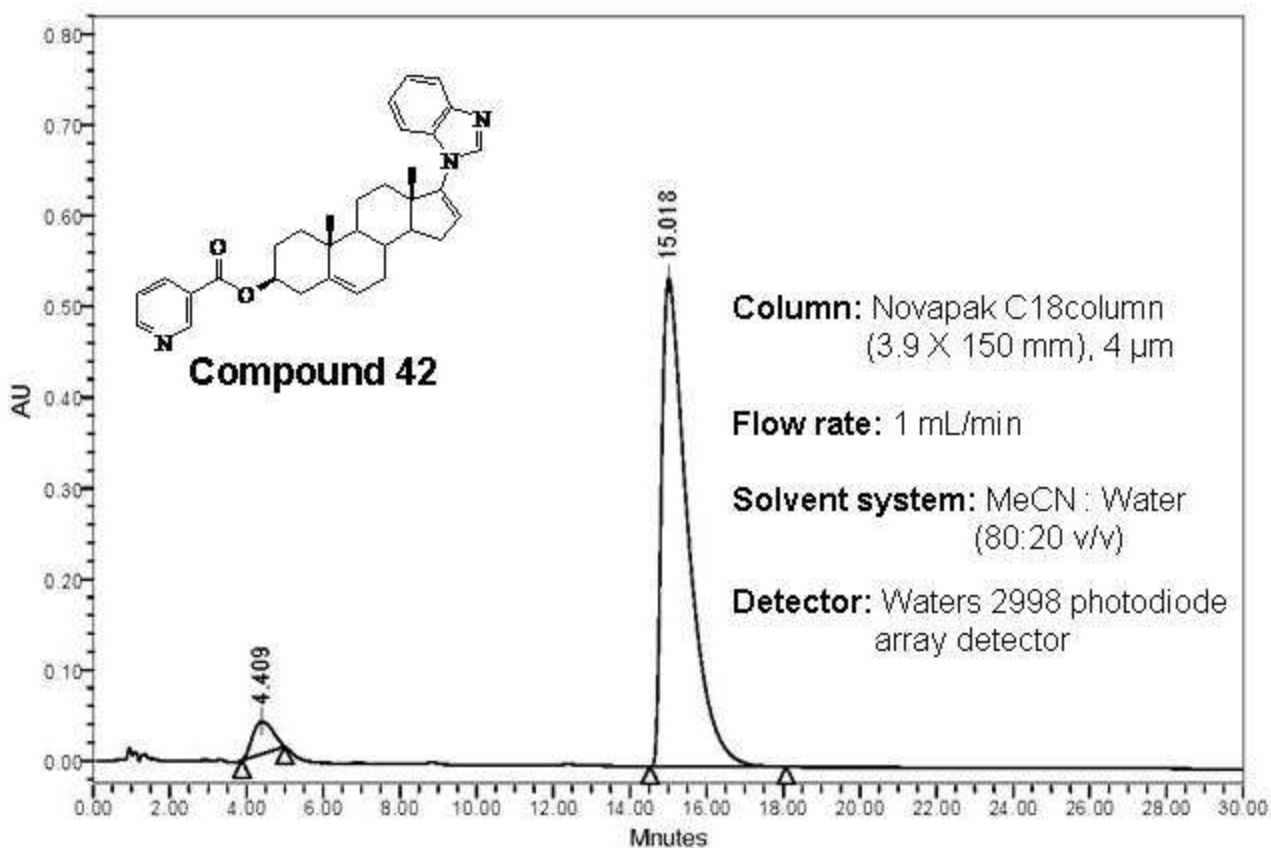

**PDA Result Table**

| Name | RT     | Area     | Purity (#1) Angle | Purity (#1) Threshold | Purity Flag | Match (#1) Spect. Name | Match (#1) Angle | Match (#1) Threshold | PDA Match Flag |
|------|--------|----------|-------------------|-----------------------|-------------|------------------------|------------------|----------------------|----------------|
| 1    | 4.409  | 1300457  |                   |                       | No          |                        |                  |                      | No             |
| 2    | 15.018 | 25447192 |                   |                       | No          |                        |                  |                      | No             |

# Mass Spectrum List Report

## Analysis Info

Analysis Name VNPT177B\_pos\_000001.d  
Method XMASS\_Method  
Sample Name: VNPT177B\_pos  
VNPT177B\_pos: in 1:1 THF:MeOH w/ NaCl

Acquisition Date 3/20/2012 11:43:04 AM  
Operator FTMS\_USER  
Instrument apex-Qe

## Acquisition Parameter

Sample: VNPT177B

Exact Mass of (C<sub>32</sub>H<sub>35</sub>N<sub>3</sub>O<sub>2</sub>)Na<sup>+</sup> = 516.262148u

Observed Mass = 516.261786u

Difference = < -1.0 ppm

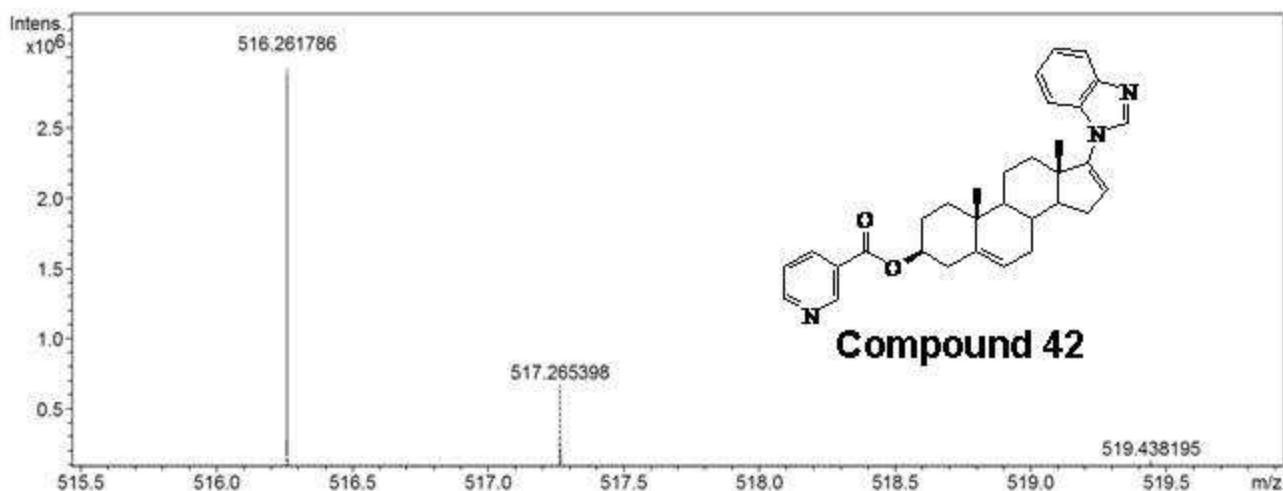

| m/z        | I        |
|------------|----------|
| 185.062451 | 1490630  |
| 209.097058 | 1390642  |
| 209.499908 | 904522   |
| 215.086193 | 1017311  |
| 215.088455 | 1842847  |
| 215.088911 | 49435935 |
| 215.089145 | 3093279  |
| 215.089265 | 1611839  |
| 215.089387 | 947647   |
| 215.089509 | 687919   |
| 216.092342 | 2405503  |
| 231.062890 | 2400542  |
| 245.099516 | 853453   |
| 247.140256 | 660689   |
| 247.143846 | 705169   |
| 273.047555 | 1148229  |
| 288.288980 | 986446   |
| 288.289607 | 14552526 |
| 289.293048 | 1163668  |
| 301.140993 | 1604117  |
| 310.271618 | 586250   |

**SAMPLE INFORMATION**

Sample Name: VNPT178  
 Sample Type: Unknown  
 Vial: 25  
 Injection #: 1  
 Injection Volume: 10.00 ul  
 Run Time: 25.0 Mnutes  
 Sample Set Name:

Acquired By: System  
 Date Acquired: 4/17/2012 1:20:21 PM  
 Acq. Method Set: VN124  
 Date Processed: 4/17/2012 5:50:01 PM  
 Processing Method: VN124venky  
 Channel Name: WIn Ch1  
 Proc. Chnl. Descr.: FDA 254.8 nm

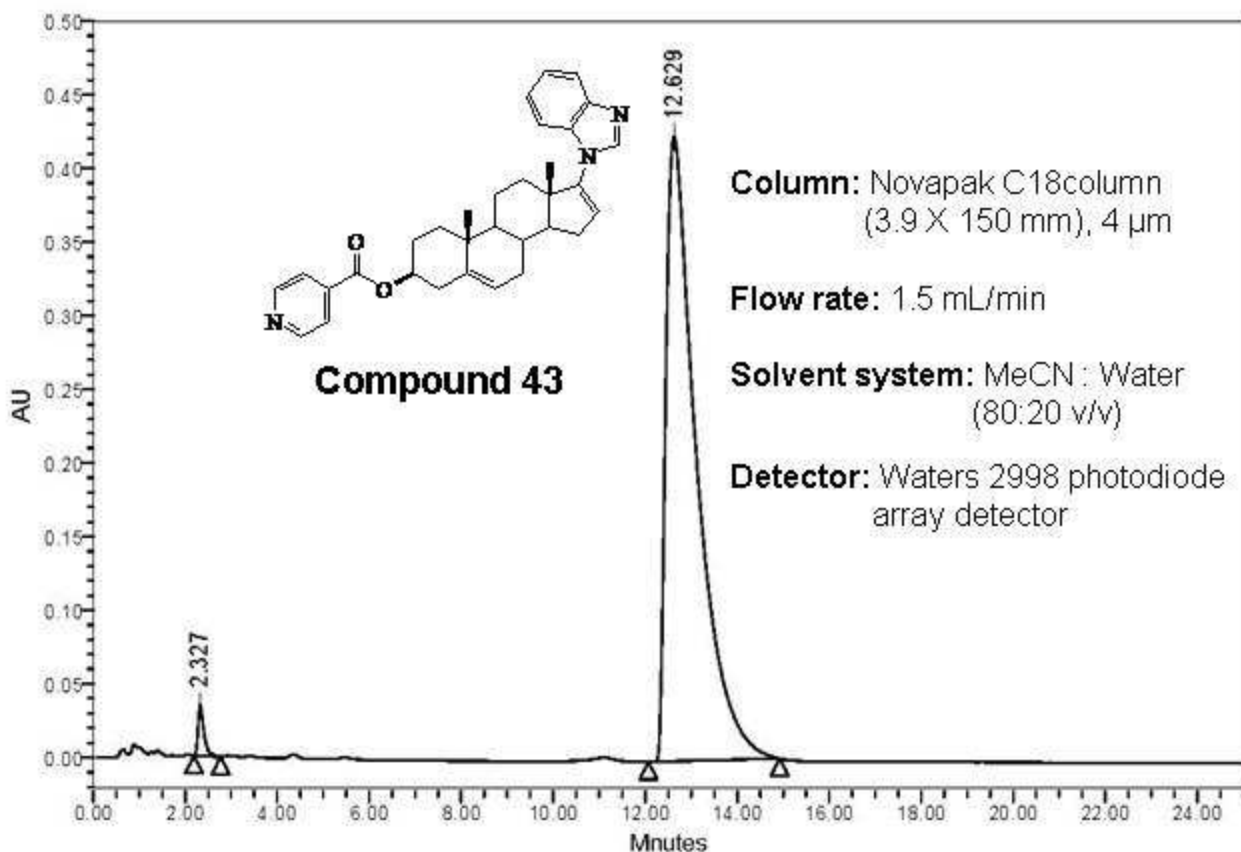

**PDA Result Table**

| Name | RT     | Area     | Purity (#1) Angle | Purity (#1) Threshold | Purity Flag | Match (#1) Spect. Name | Match (#1) Angle | Match (#1) Threshold | PDA Match Flag |
|------|--------|----------|-------------------|-----------------------|-------------|------------------------|------------------|----------------------|----------------|
| 1    | 2.327  | 306176   |                   |                       | No          |                        |                  |                      | No             |
| 2    | 12.629 | 19652190 |                   |                       | No          |                        |                  |                      | No             |

| Name | Retention Time (min) | Purity1 Angle | Purity1 Threshold | PDA Match1 Spect. Name | PDA Match1 Angle | PDA Match1 Threshold | PDA Match1 Lib. Name | Area (µV*sec) | % Area | Height (µV) | Int Type | Amount |
|------|----------------------|---------------|-------------------|------------------------|------------------|----------------------|----------------------|---------------|--------|-------------|----------|--------|
| 1    | 2.327                |               |                   |                        |                  |                      |                      | 306176        | 1.53   | 34529       | bb       |        |
| 2    | 12.629               |               |                   |                        |                  |                      |                      | 19652190      | 98.47  | 424202      | bb       |        |

# Mass Spectrum List Report

## Analysis Info

Analysis Name: VNPT178\_pos\_000001.d  
Method: XMASS\_Method  
Sample Name: VNPT178\_pos  
VNPT178\_pos: in 1:1 THF:MeOH w/ NaCl.

Acquisition Date: 3/20/2012 11:38:43 AM  
Operator: FTMS\_USER  
Instrument: apex-Qe

## Acquisition Parameter

Sample: VNPT178

Exact Mass of (C<sub>32</sub>H<sub>35</sub>N<sub>3</sub>O<sub>2</sub>)Na<sup>+</sup> = 516.262148u

Observed Mass = 516.261577u

Difference = -1.1 ppm

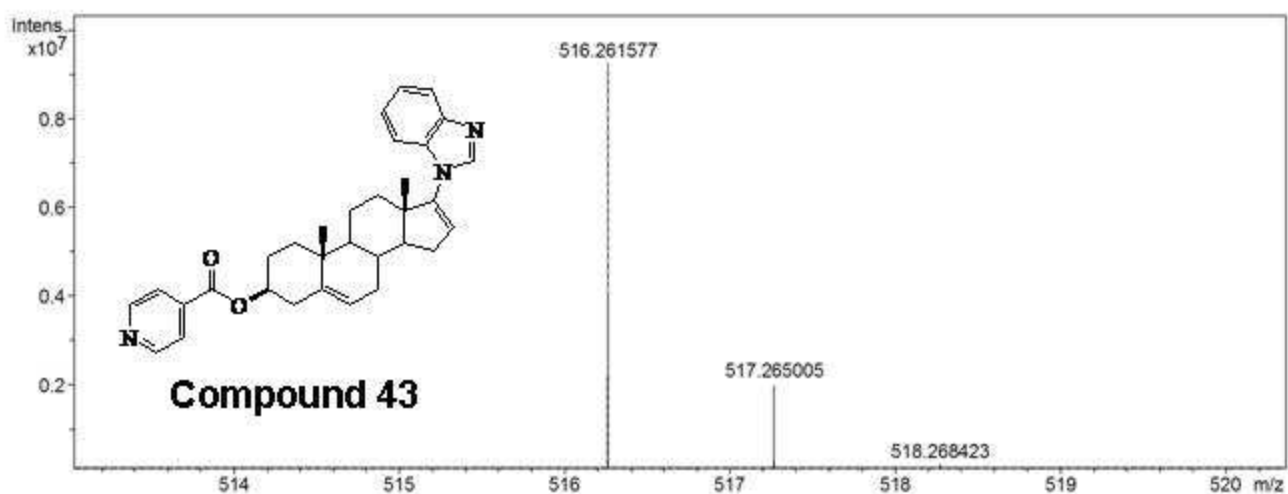

| m/z        | I         |
|------------|-----------|
| 185.062477 | 1065821   |
| 209.097140 | 2554732   |
| 215.088622 | 3864074   |
| 215.088876 | 36556586  |
| 216.092292 | 1936729   |
| 231.062860 | 1750153   |
| 273.047517 | 1827067   |
| 288.289553 | 7934390   |
| 301.140957 | 1170096   |
| 316.320830 | 4056634   |
| 360.323466 | 1730833   |
| 389.258530 | 1145729   |
| 413.265859 | 16268233  |
| 414.269355 | 2832844   |
| 429.239902 | 3820018   |
| 494.265021 | 2184844   |
| 494.275782 | 1652364   |
| 494.276404 | 2849932   |
| 494.276992 | 4674700   |
| 494.277485 | 3841164   |
| 494.279453 | 160095372 |

**SAMPLE INFORMATION**

Sample Name: VNFP307C  
 Sample Type: Unknown  
 Vial: 32  
 Injection #: 1  
 Injection Volume: 20.00 ul  
 Run Time: 30.0 Minutes  
 Sample Set Name: Puru Sample Set 2

Acquired By: System  
 Date Acquired: 4/13/2012 4:49:26 AM  
 Acq. Method Set: VN124  
 Date Processed: 4/13/2012 12:05:26 PM  
 Processing Method: VN124venky  
 Channel Name: WWin Ch1  
 Proc. Chnl. Descr.: PDA 242.7 nm

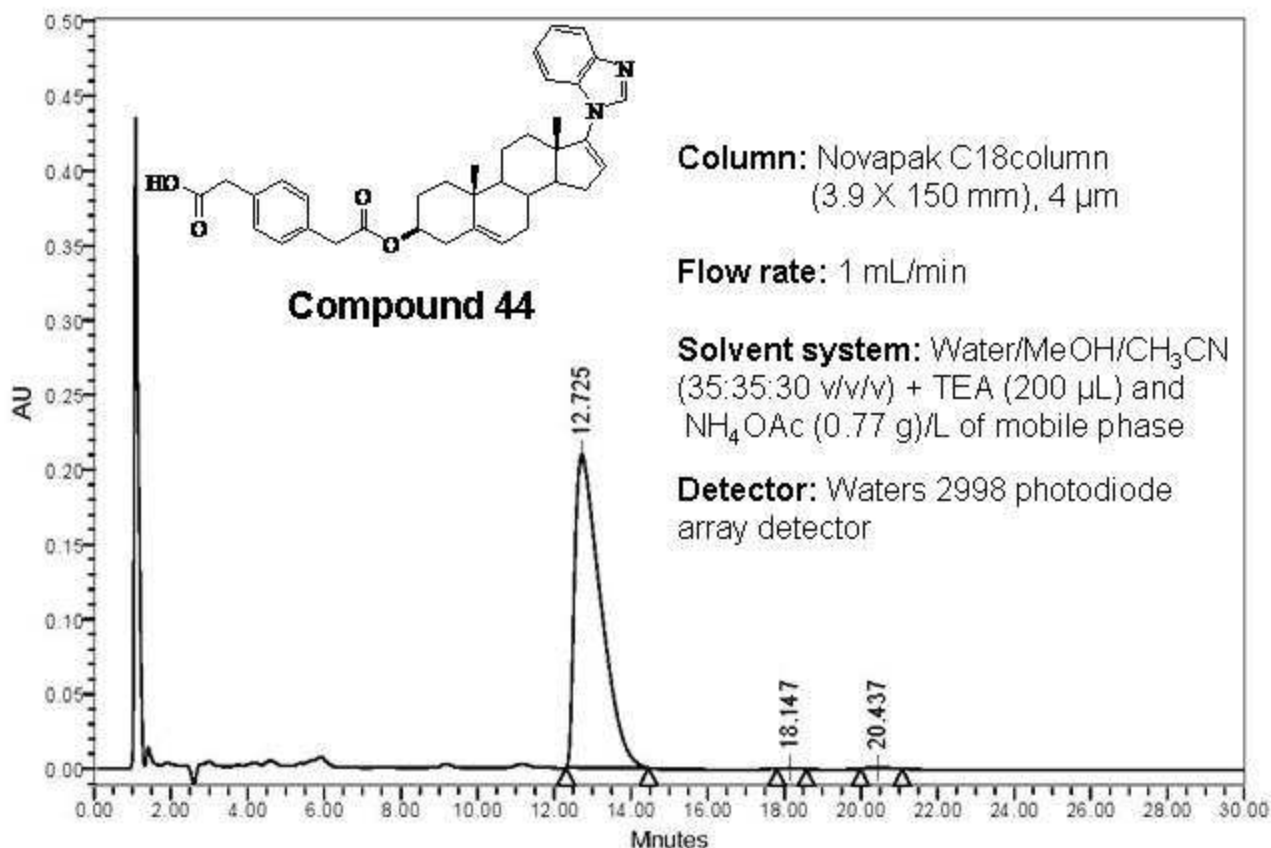

**PDA Result Table**

| Name | Retention Time (min) | Purity1 Angle | Purity1 Threshold | PDA Match1 Spect. Name | PDA Match1 Angle | PDA Match1 Threshold | PDA Match1 Lib. Name | Area (µV*sec) | % Area | Height (µV) | Int Type | Amount |
|------|----------------------|---------------|-------------------|------------------------|------------------|----------------------|----------------------|---------------|--------|-------------|----------|--------|
| 1    | 12.725               |               |                   |                        |                  |                      |                      | 9835773       | 99.54  | 209607      | bb       |        |
| 2    | 18.147               |               |                   |                        |                  |                      |                      | 14037         | 0.14   | 544         | bb       |        |
| 3    | 20.437               |               |                   |                        |                  |                      |                      | 31755         | 0.32   | 870         | bb       |        |
|      | 20.437               | 31755         |                   |                        | No               |                      |                      |               | No     |             |          |        |

# Mass Spectrum List Report

## Analysis Info

Analysis Name VNPT307C\_pos\_000001.d  
Method XMASS\_Method  
Sample Name: VNPT307C\_pos  
VNPT307C\_pos: in 1:1 THF:MeOH w/ NaCl.

Acquisition Date 3/20/2012 11:30:04 AM  
Operator FTMS\_USER  
Instrument apex-Qe

## Acquisition Parameter

Sample: VNPT307C

Exact Mass of (C<sub>36</sub>H<sub>40</sub>N<sub>2</sub>O<sub>4</sub>)Na<sup>+</sup> = 587.288029u

Observed Mass = 587.287654u

Difference = < -1.0 ppm

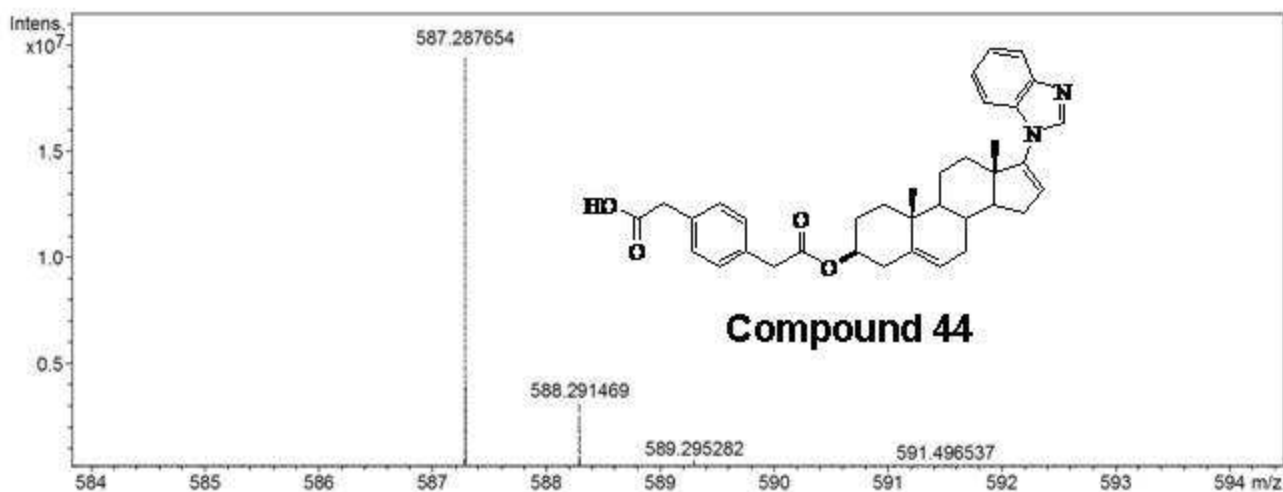

| m/z        | I        |
|------------|----------|
| 184.723590 | 1413539  |
| 185.062424 | 3832089  |
| 215.088615 | 2539430  |
| 215.088961 | 35047206 |
| 231.062920 | 3051173  |
| 288.289724 | 1830199  |
| 413.265200 | 2912084  |
| 413.266025 | 30145364 |
| 413.266860 | 2572116  |
| 414.269513 | 4845397  |
| 429.240036 | 16276324 |
| 429.240877 | 1447268  |
| 430.243262 | 1568869  |
| 522.595663 | 2752675  |
| 522.596907 | 25943203 |
| 522.598278 | 2046115  |
| 523.600455 | 7666858  |
| 550.610122 | 2990436  |
| 550.621650 | 1256804  |
| 550.622477 | 2005348  |
| 550.624122 | 6589797  |

**SAMPLE INFORMATION**

Sample Name: VNFP305  
 Sample Type: Unknown  
 Vial: 29  
 Injection #: 1  
 Injection Volume: 20.00 ul  
 Run Time: 30.0 Mnutes  
 Sample Set Name:

Acquired By: System  
 Date Acquired: 4/19/2012 1:28:31 PM  
 Acq. Method Set: VN124  
 Date Processed: 4/19/2012 2:25:22 PM  
 Processing Method: VN124venky  
 Channel Name: WIn Ch1  
 Proc. Chnl. Descr.: FDA 242.7 nm

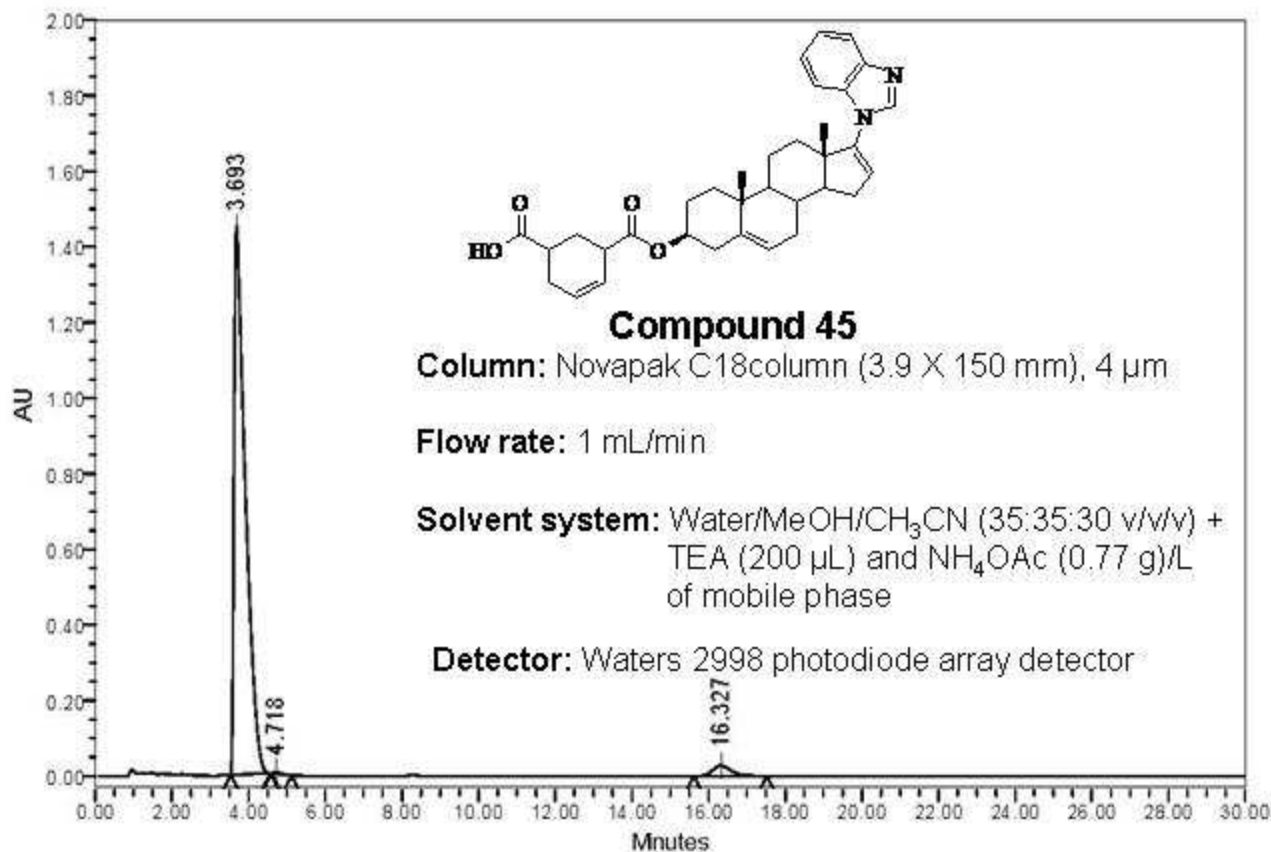

**PDA Result Table**

| Name | Retention Time (min) | Purity1 Angle | Purity1 Threshold | PDA Match1 Spect. Name | PDA Match1 Angle | PDA Match1 Threshold | PDA Match1 Lib. Name | Area (μV*sec) | % Area | Height (μV) | Int Type | Amount |
|------|----------------------|---------------|-------------------|------------------------|------------------|----------------------|----------------------|---------------|--------|-------------|----------|--------|
| 1    | 3.693                |               |                   |                        |                  |                      |                      | 29609358      | 96.73  | 1453562     | bb       |        |
| 2    | 4.718                |               |                   |                        |                  |                      |                      | 52987         | 0.17   | 3831        | bb       |        |
| 3    | 16.327               |               |                   |                        |                  |                      |                      | 948867        | 3.10   | 27735       | bb       |        |



# Mass Spectrum List Report

## Analysis Info

Analysis Name VNPT305\_pos\_000001.d  
Method XMASS\_Method  
Sample Name: VNPT305\_pos  
VNPT305\_pos: in 1:1 THF:MeOH w/ NaCl.

Acquisition Date 3/20/2012 11:21:17 AM  
Operator FTMS\_USER  
Instrument apex-Qe

## Acquisition Parameter

Sample: VNPT305

Exact Mass of (C<sub>34</sub>H<sub>40</sub>N<sub>2</sub>O<sub>4</sub>)Na<sup>+</sup> = 563.288029u

Observed Mass = 563.287968u

Difference = < -1.0 ppm

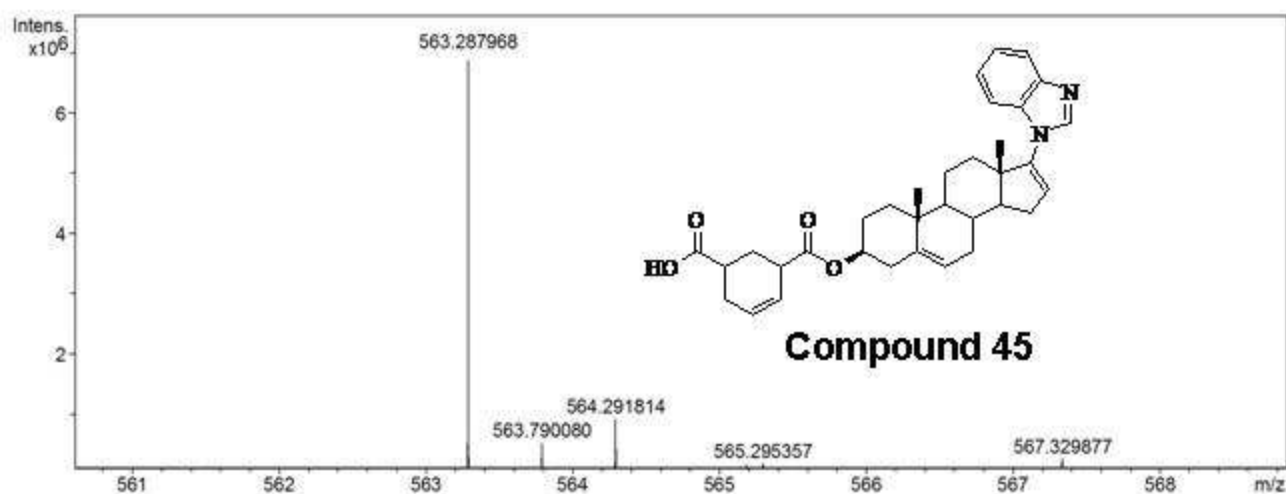

| m/z        | I        |
|------------|----------|
| 184.723534 | 788919   |
| 185.062355 | 2047755  |
| 209.499911 | 826085   |
| 215.088626 | 1621843  |
| 215.088971 | 16155155 |
| 231.062933 | 3294610  |
| 275.314670 | 741804   |
| 283.094117 | 7861642  |
| 299.068021 | 10771920 |
| 300.071368 | 842837   |
| 413.266271 | 5815272  |
| 414.269588 | 750188   |
| 429.239295 | 807968   |
| 429.240195 | 8858656  |
| 430.243867 | 649763   |
| 475.193433 | 752823   |
| 475.194206 | 696759   |
| 522.597101 | 12162398 |
| 523.600407 | 1687906  |
| 541.305990 | 10032548 |
| 542.309702 | 1342632  |

### SAMPLE INFORMATION

Sample Name: VNFP306  
 Sample Type: Unknown  
 Vial: 31  
 Injection #: 1  
 Injection Volume: 20.00 ul  
 Run Time: 30.0 Minutes  
 Sample Set Name: Furu Sample Set 2

Acquired By: System  
 Date Acquired: 4/13/2012 4:18:11 AM  
 Acq. Method Set: VN124  
 Date Processed: 4/16/2012 1:07:01 PM  
 Processing Method: VN124venky  
 Channel Name: WIn Ch1  
 Proc. Chnl. Descr.: FDA 309.3 nm

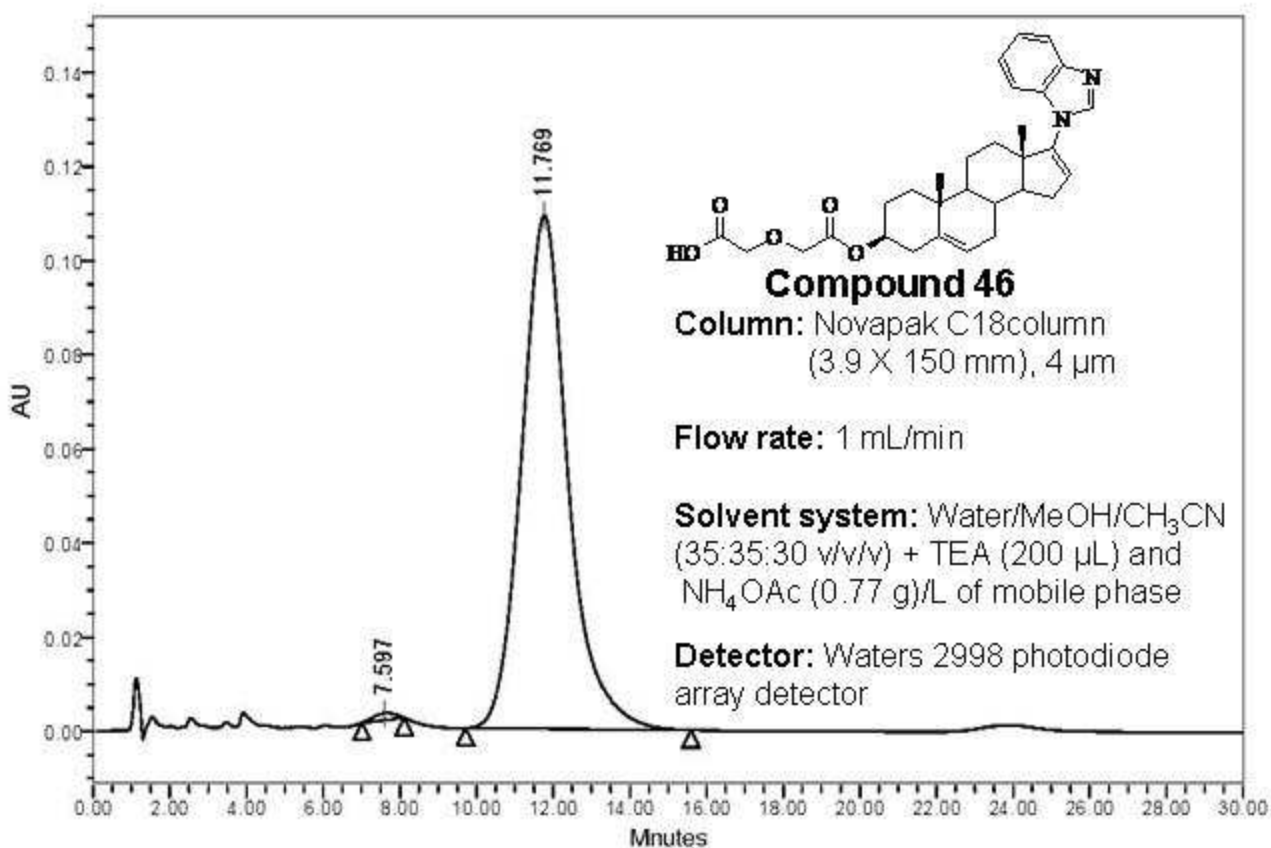

PDA Result Table

| Name | RT     | Area    | Purity (#1) Angle | Purity (#1) Threshold | Purity Flag | Match (#1) Spect. Name | Match (#1) Angle | Match (#1) Threshold | PDA Match Flag |
|------|--------|---------|-------------------|-----------------------|-------------|------------------------|------------------|----------------------|----------------|
| 1    | 7.597  | 58941   |                   |                       | No          |                        |                  |                      | No             |
| 2    | 11.769 | 9196748 |                   |                       | No          |                        |                  |                      | No             |

| Name | Retention Time (min) | Purity1 Angle | Purity1 Threshold | PDA Match1 Spect. Name | PDA Match1 Angle | PDA Match1 Threshold | PDA Match1 Lib. Name | Area (µV*sec) | % Area | Height (µV) | Int Type | Amount |
|------|----------------------|---------------|-------------------|------------------------|------------------|----------------------|----------------------|---------------|--------|-------------|----------|--------|
| 1    | 7.597                |               |                   |                        |                  |                      |                      | 58941         | 0.64   | 1464        | bb       |        |
| 2    | 11.769               |               |                   |                        |                  |                      |                      | 9196748       | 99.36  | 109087      | bb       |        |

# Mass Spectrum List Report

## Analysis Info

Analysis Name VNPT306\_pos\_000001.d  
Method XMASS\_Method  
Sample Name: VNPT306\_pos  
VNPT306\_pos: in 1:1 THF:MeOH w/ NaCl.

Acquisition Date 3/20/2012 11:25:50 AM  
Operator FTMS\_USER  
Instrument apex-Qe

## Acquisition Parameter

Sample: VNPT306

Exact Mass of (C<sub>30</sub>H<sub>36</sub>N<sub>2</sub>O<sub>5</sub>)Na<sup>+</sup> = 527.251643u

Observed Mass = 527.251610u

Difference = < -1.0 ppm

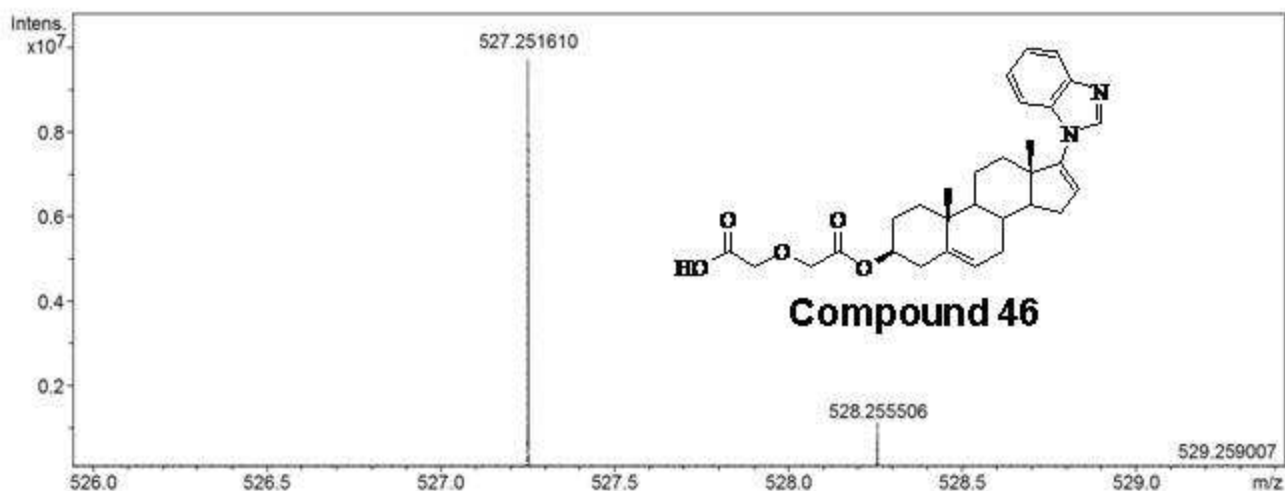

| m/z        | I        |
|------------|----------|
| 184.723567 | 1354535  |
| 185.062420 | 4080649  |
| 209.499907 | 859991   |
| 215.088620 | 1381261  |
| 215.088997 | 17456685 |
| 215.089199 | 1567213  |
| 231.062948 | 2398701  |
| 275.314597 | 985332   |
| 275.319017 | 841972   |
| 413.266188 | 19946348 |
| 414.269687 | 1766383  |
| 429.238362 | 942233   |
| 429.240104 | 21519257 |
| 430.243703 | 1700380  |
| 505.270133 | 1121166  |
| 522.597030 | 27270358 |
| 522.598186 | 2472150  |
| 523.600619 | 7920858  |
| 527.250311 | 1060074  |
| 527.251610 | 9858282  |
| 528.255506 | 1114862  |

**SAMPLE INFORMATION**

Sample Name: VNPT55  
 Sample Type: Unknown  
 Vial: 3  
 Injection #: 1  
 Injection Volume: 10.00 ul  
 Run Time: 20.0 Minutes  
 Sample Set Name:

Acquired By: System  
 Date Acquired: 4/16/2012 5:14:35 PM  
 Acq. Method Set: VN124  
 Date Processed: 4/16/2012 5:37:09 PM  
 Processing Method: VN124venky  
 Channel Name: WIn Ch1  
 Proc. Chnl. Descr.: FDA 242.7 nm

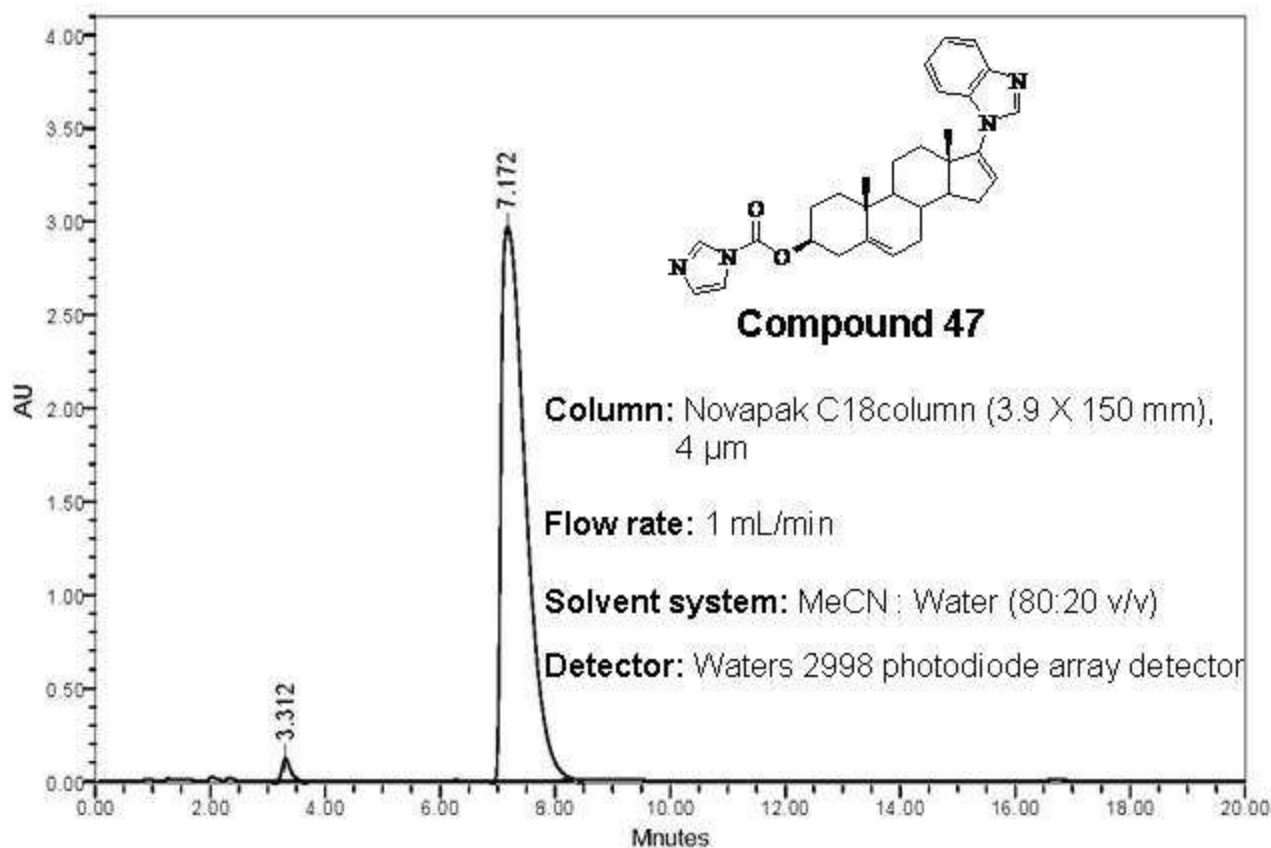

**PDA Result Table**

| Name | RT    | Area     | Purity (#1) Angle | Purity (#1) Threshold | Purity Flag | Match (#1) Spect. Name | Match (#1) Angle | Match (#1) Threshold | PDA Match Flag |
|------|-------|----------|-------------------|-----------------------|-------------|------------------------|------------------|----------------------|----------------|
| 1    | 3.312 | 1208766  |                   |                       | No          |                        |                  |                      | No             |
| 2    | 7.172 | 86587610 |                   |                       | No          |                        |                  |                      | No             |

| Name | Retention Time (min) | Purity1 Angle | Purity1 Threshold | PDA Match1 Spect. Name | PDA Match1 Angle | PDA Match1 Threshold | PDA Match1 Lib. Name | Area (μV*sec) | % Area | Height (μV) | Int Type | Amount |
|------|----------------------|---------------|-------------------|------------------------|------------------|----------------------|----------------------|---------------|--------|-------------|----------|--------|
| 1    | 3.312                |               |                   |                        |                  |                      |                      | 1208766       | 1.38   | 121508      | bb       |        |
| 2    | 7.172                |               |                   |                        |                  |                      |                      | 86587610      | 98.62  | 2971456     | bb       |        |

# Mass Spectrum List Report

## Analysis Info

Analysis Name VNPT55\_pos\_000003.d  
Method XMASS\_Method  
Sample Name: VNPT55\_pos  
VNPT55\_pos: in 1:1 THF:MeOH w/ NaCl.

Acquisition Date 12/13/2010 2:21:55 PM  
Operator FTMS\_USER  
Instrument apex-Qe

## Acquisition Parameter

Sample Name: VNPT55  
Exact Mass of (C<sub>30</sub>H<sub>34</sub>N<sub>4</sub>O<sub>2</sub>)Na<sup>+</sup>: 505.257397u  
Observed Mass: 505.257797u  
Difference: < 1.0 ppm

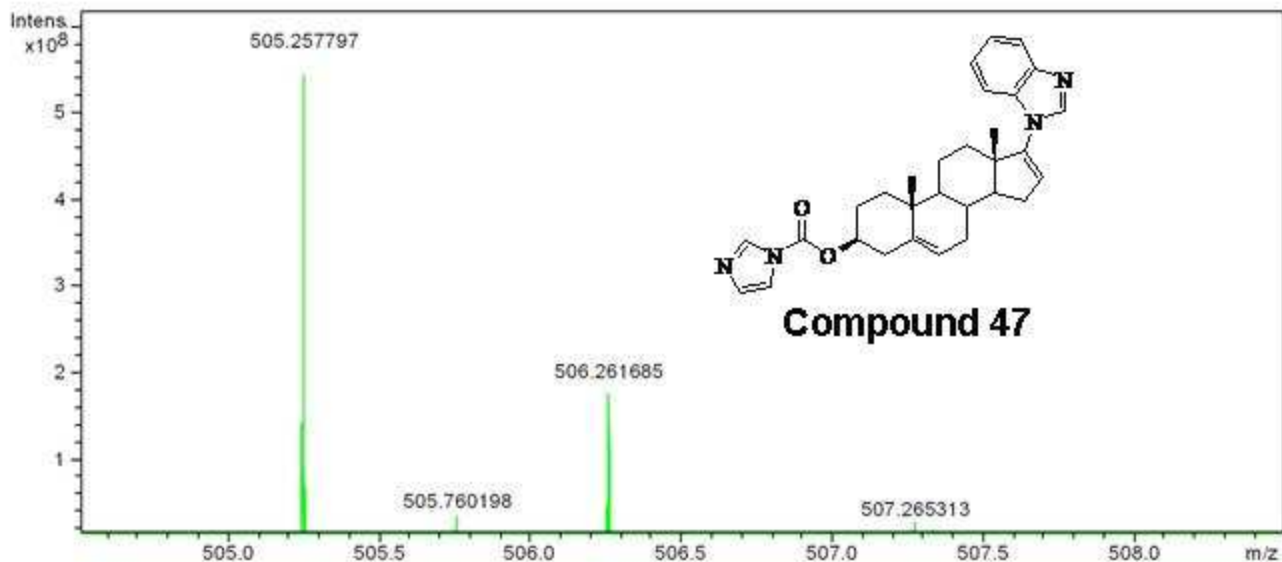

| #  | m/z        | I         |
|----|------------|-----------|
| 1  | 371.248676 | 11977620  |
| 2  | 437.194304 | 19395642  |
| 3  | 447.265010 | 19674327  |
| 4  | 461.268391 | 14628311  |
| 5  | 463.304127 | 10950144  |
| 6  | 483.270994 | 36534184  |
| 7  | 483.272990 | 19404712  |
| 8  | 483.274223 | 40040360  |
| 9  | 483.276045 | 286324848 |
| 10 | 483.278097 | 29095848  |
| 11 | 483.279379 | 13154216  |
| 12 | 484.274508 | 16029630  |
| 13 | 484.277525 | 12203966  |
| 14 | 484.279676 | 85981118  |
| 15 | 485.283277 | 11655124  |
| 16 | 500.268386 | 11671843  |
| 17 | 505.252033 | 141310353 |
| 18 | 505.255574 | 63699345  |
| 19 | 505.257797 | 564984209 |
| 20 | 505.262526 | 18012561  |
| 21 | 505.263850 | 12339601  |
| 22 | 505.265141 | 8595857   |
| 23 | 505.754534 | 17463708  |

**SAMPLE INFORMATION**

|                   |              |                     |                      |
|-------------------|--------------|---------------------|----------------------|
| Sample Name:      | VNPT124      | Acquired By:        | System               |
| Sample Type:      | Unknown      | Date Acquired:      | 4/18/2012 3:46:28 PM |
| Vial:             | 17           | Acq. Method Set:    | VN124                |
| Injection #:      | 1            | Date Processed:     | 4/18/2012 4:12:16 PM |
| Injection Volume: | 15.00 ul     | Processing Method:  | VN124venky           |
| Run Time:         | 20.0 Minutes | Channel Name:       | WIn Ch1              |
| Sample Set Name:  |              | Proc. Chnl. Descr.: | FDA 242.7 nm         |

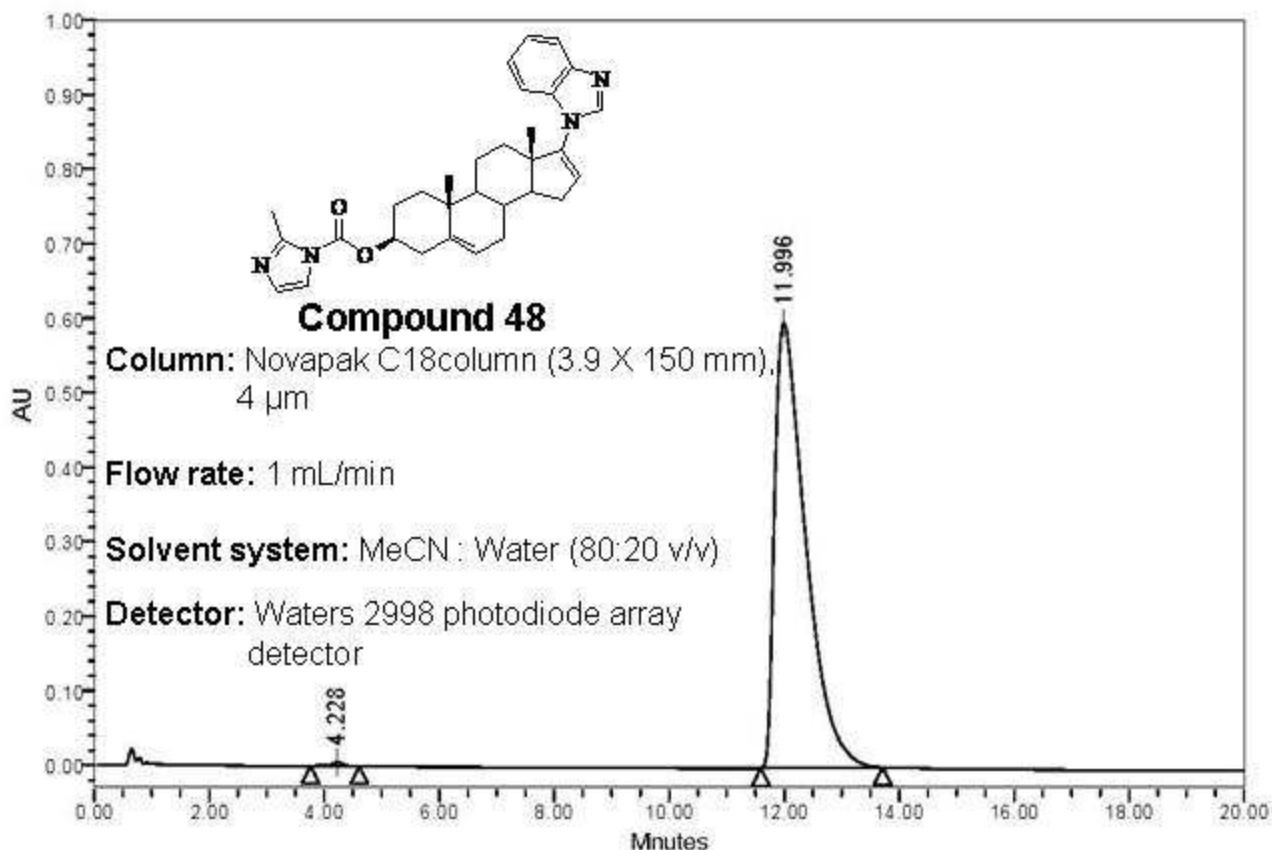

**PDA Result Table**

| Name | RT     | Area     | Purity (#1) Angle | Purity (#1) Threshold | Purity Flag | Match (#1) Spect. Name | Match (#1) Angle | Match (#1) Threshold | PDA Match Flag |
|------|--------|----------|-------------------|-----------------------|-------------|------------------------|------------------|----------------------|----------------|
| 1    | 4.228  | 85756    |                   |                       | No          |                        |                  |                      | No             |
| 2    | 11.996 | 22321100 |                   |                       | No          |                        |                  |                      | No             |

# Mass Spectrum List Report

## Analysis Info

Analysis Name VNPT124\_pos\_000001.d

Method XMASS\_Method

Sample Name: VNPT124\_pos

VNPT124\_pos; in 1:1 THF:MeOH w/ NaCl.

Acquisition Date 12/13/2010 3:09:48 PM

Operator FTMS\_USER

Instrument apex-Qe

## Acquisition Parameter

Sample Name: VNPT124

Exact Mass of (C<sub>31</sub>H<sub>36</sub>N<sub>4</sub>O<sub>2</sub>)Na<sup>+</sup>: 519.273048u

Observed Mass: 519.273048u

Difference: < 1.0 ppm

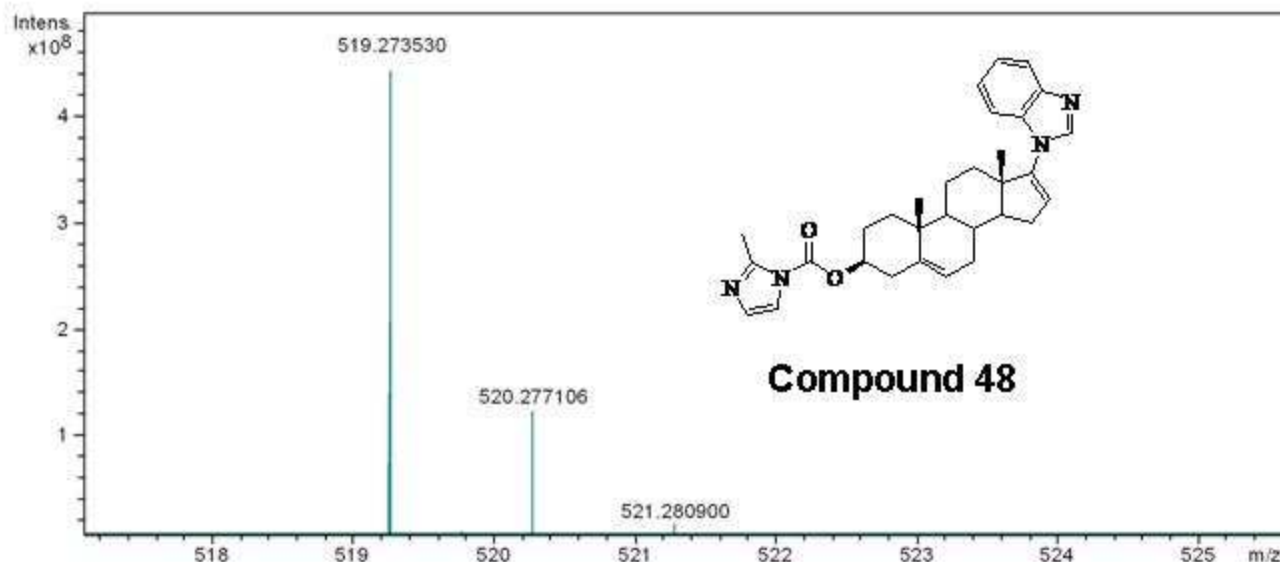

| #  | m/z        | I         |
|----|------------|-----------|
| 1  | 259.635577 | 8467253   |
| 2  | 437.194366 | 14273672  |
| 3  | 453.302128 | 9473279   |
| 4  | 463.304118 | 6124888   |
| 5  | 475.284244 | 14331345  |
| 6  | 476.287497 | 4847068   |
| 7  | 497.288537 | 5080782   |
| 8  | 497.289576 | 8302286   |
| 9  | 497.292015 | 50081486  |
| 10 | 498.295472 | 17133275  |
| 11 | 507.330366 | 15601484  |
| 12 | 519.263745 | 5126119   |
| 13 | 519.273530 | 452767720 |
| 14 | 519.275741 | 46772200  |
| 15 | 519.277296 | 19607528  |
| 16 | 519.278741 | 11366376  |
| 17 | 519.280143 | 7053288   |
| 18 | 519.281571 | 5115880   |
| 19 | 519.775808 | 10325998  |
| 20 | 520.270138 | 4567029   |
| 21 | 520.273080 | 11505653  |
| 22 | 520.277106 | 123056117 |
| 23 | 520.281089 | 5930997   |

Reported by User: System

Project Name: FDA\_Default

**SAMPLE INFORMATION**

Sample Name: VNPT153B  
 Sample Type: Unknown  
 Vial: 24  
 Injection #: 1  
 Injection Volume: 5.00 ul  
 Run Time: 20.0 Minutes  
 Sample Set Name:

Acquired By: System  
 Date Acquired: 4/17/2012 4:39:33 PM  
 Acq. Method Set: VN124  
 Date Processed: 4/17/2012 5:02:57 PM  
 Processing Method: VN124venky  
 Channel Name: WWin Ch1  
 Proc. Chnl. Descr.: FDA 242.7 nm

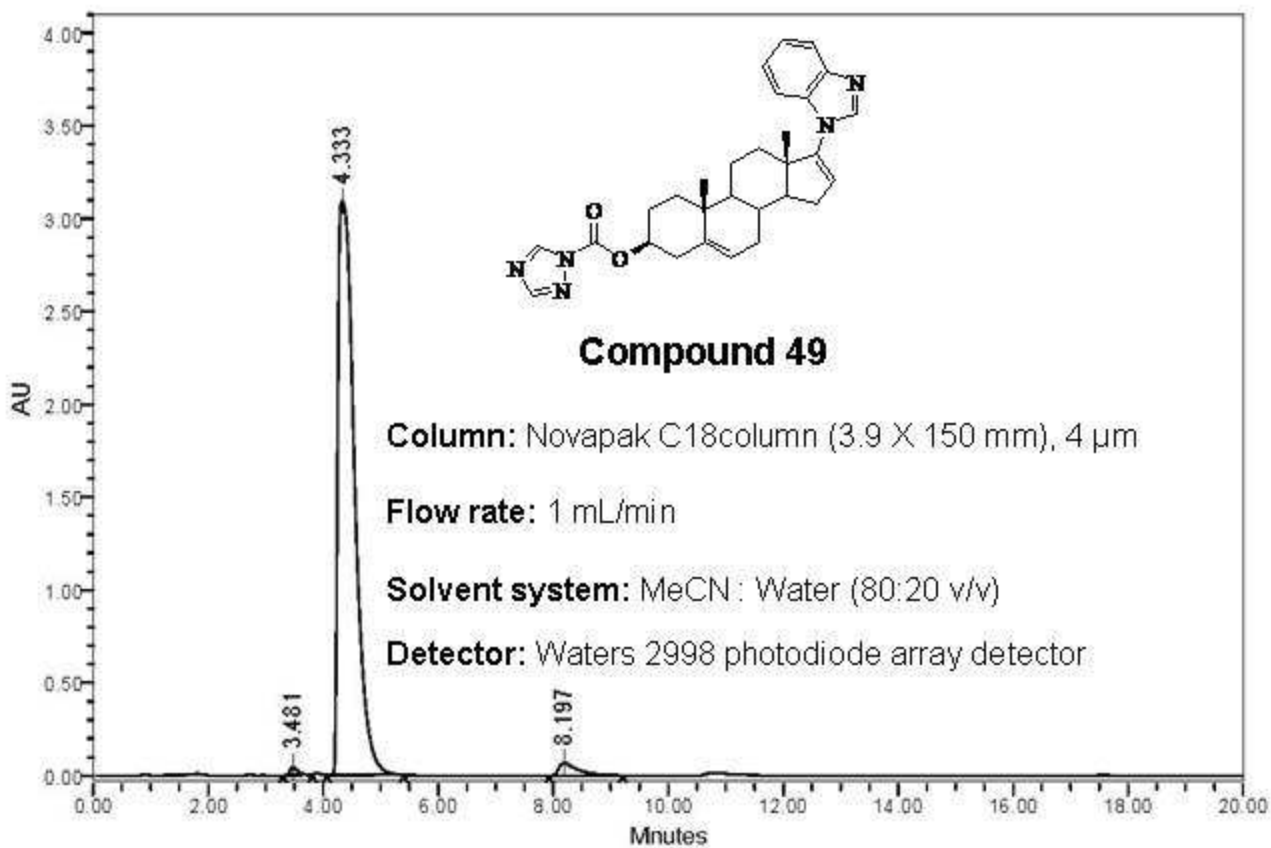

**PDA Result Table**

| Name | Retention Time (min) | Purity1 Angle | Purity1 Threshold | PDA Match1 Spect. Name | PDA Match1 Angle | PDA Match1 Threshold | PDA Match1 Lib. Name | Area (μV*sec) | % Area | Height (μV) | Int Type | Amount |
|------|----------------------|---------------|-------------------|------------------------|------------------|----------------------|----------------------|---------------|--------|-------------|----------|--------|
| 1    | 3.481                |               |                   |                        |                  |                      |                      | 430247        | 0.67   | 45813       | bb       |        |
| 2    | 4.333                |               |                   |                        |                  |                      |                      | 62017322      | 96.79  | 3091354     | bb       |        |
| 3    | 8.197                |               |                   |                        |                  |                      |                      | 1625863       | 2.54   | 68672       | bb       |        |



# Mass Spectrum List Report

## Analysis Info

Analysis Name VNPT153B\_pos\_000001.d  
Method XMASS\_Method  
Sample Name: VNPT153B\_pos  
VNPT153B\_pos: in 1:1 THF:MeOH w/ NaCl

Acquisition Date 3/20/2012 11:34:29 AM  
Operator FTMS\_USER  
Instrument apex-Qe

## Acquisition Parameter

Sample: VNPT153B

Exact Mass of (C<sub>29</sub>H<sub>33</sub>N<sub>5</sub>O<sub>2</sub>)Na<sup>+</sup> = 506.252646u

Observed Mass = 506.252542u

Difference = < -1.0 ppm

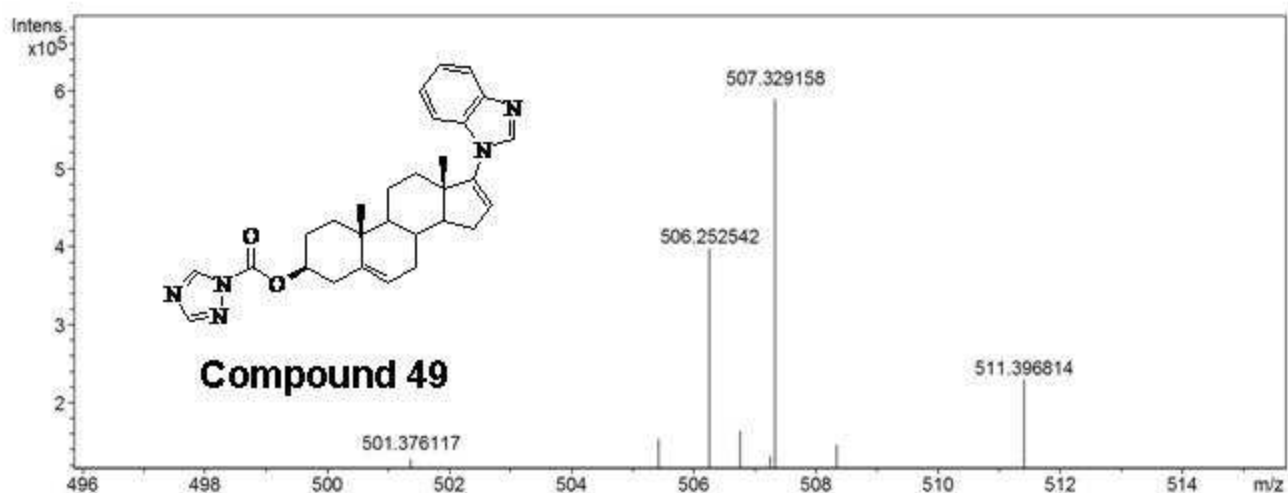

| m/z        | I        |
|------------|----------|
| 184.315475 | 139658   |
| 184.723645 | 874819   |
| 184.949376 | 116849   |
| 185.062462 | 2233145  |
| 193.872434 | 121730   |
| 193.996706 | 121389   |
| 195.643278 | 209406   |
| 204.161043 | 125813   |
| 209.499908 | 874755   |
| 213.073307 | 237163   |
| 214.140641 | 425445   |
| 214.729692 | 1642449  |
| 215.083463 | 149318   |
| 215.086190 | 1015528  |
| 215.088571 | 3477104  |
| 215.088905 | 54268720 |
| 216.089478 | 115767   |
| 216.091969 | 499152   |
| 216.092332 | 2510608  |
| 216.825607 | 113252   |
| 217.093155 | 223540   |
